# Supplementary material for: Reactivity differences between 2,4- and 2,5-disubstituted zirconacyclopentadienes: a highly selective and general approach to 2,4-disubstituted phospholes
Source: Royal Society of Chemistry journal article supplement (doi:10.1039/c3dt51158h), 2013-01-01

Supporting Information

**Reactivity differences between 2,4- and 2,5-disubstituted zirconacyclopentadienes: a highly selective and general approach to 2,4-disubstituted phospholes.**

Guillaume Bousrez,<sup>a</sup> Florian Jaroschik,<sup>\*a</sup> Dominique Harakat,<sup>a</sup> Agathe Martinez,<sup>a</sup> Emmanuel Nicolas,<sup>b</sup> Xavier F. Le Goff,<sup>b</sup> Jan Szymoniak<sup>\*a</sup>

<sup>a</sup> Institut de Chimie Moléculaire de Reims, ICMR, UMR CNRS 7312, Université de Reims, BP 1039, 51687 Reims, France.

<sup>b</sup> Laboratoire « Hétéroéléments et Coordination », Ecole Polytechnique and CNRS, 91128 Palaiseau Cedex, France.

Fax: +33 326913166

Tel: +33 326913244

E-mail: florian.jaroschik@univ-reims.fr; jan.szymoniak@univ-reims.fr

Content

|                                                                                                          |     |
|----------------------------------------------------------------------------------------------------------|-----|
| I. Spectroscopic data of compounds <b>3a-m</b>                                                           | S2  |
| II. Crystallographic data for <b>1b</b> , <b>3a</b> and <b>5a</b>                                        | S12 |
| III. Details on DFT calculations of compounds <b>1a</b> , <b>1b</b> , <b>1d</b> and <b>1e</b>            | S15 |
| IV. References for Gaussian                                                                              | S26 |
| V. <sup>1</sup> H, <sup>13</sup> C and <sup>31</sup> P NMR spectra for compounds <b>1b</b> , <b>3a-l</b> | S27 |

## I. Spectroscopic data of compounds **3a-m**

### General procedure for the optimized preparation of phospholes **3**.

A Schlenk tube was loaded with dichlorozirconocene ( $\text{Cp}_2\text{ZrCl}_2$ ) (584 mg, 2.0 mmol), lanthanum (186 mg, 1.32 mmol) and THF (10 mL) under an atmosphere of argon. The resulting mixture was stirred vigorously at room temperature until a deep red color appeared. At this stage, the alkyne (4 mmol) was added to the reaction mixture and the stirring was continued until complete disappearance of the alkyne as shown by TLC. Then the optimized amount of dichlorophenylphosphine (1.05 - 1.70 mmol) was added at  $-78^\circ\text{C}$ . After slow warming to room temperature, the reaction mixture was stirred for 18 h. After that time, petroleum ether (20 mL) was added to the brown solution and the solution was filtered over a short column of basic aluminum oxide using petroleum ether/ethyl acetate 8:2 as eluent. The solvent was evaporated and the crude residue was purified by flash column chromatography on silica gel using petroleum ether to yield phospholes **3**. Alternatively, solid phospholes were obtained by recrystallisation from the crude residue using diethyl ether.

### Procedure for determining the ratio **3/4**

The above reaction was carried out with 1.0 equivalent of dichlorophosphine. Before quenching the reaction mixture, a sample (2 mL) of the solution of phospholes was taken, quenched with water and extracted with diethyl ether. The solvent was evaporated and the residue was analyzed by  $^1\text{H}$  NMR to determine the ratio **3/4** based on the protons of the phosphole and butadiene backbones.

### **1,2,4-triphenylphosphole (3a)**

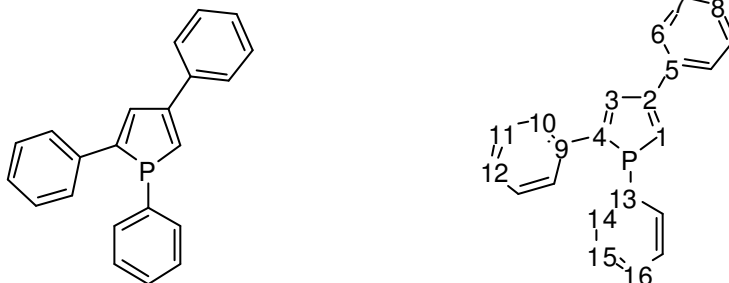

According to the general procedure using phenylacetylene (0.42 mL, 4.0 mmol) and dichlorophenylphosphine (0.14 mL, 1.0 mmol), **3a** was obtained as a light yellow solid in 70.0 % yield (0.70 mmol, 218 mg).

$^1\text{H}$  (500 MHz,  $\text{CDCl}_3$ )

7.08 (dd,  $J_{\text{P-H}} = 40.0$  Hz,  $J_{\text{H-H}} = 1.5$  Hz, 1H, H1), 7.22-7.29 (m, 3H, H12, H15), 7.31 (d,  $J_{\text{H-H}} = 8.0$  Hz, 2H, H11), 7.34-7.38 (m, 3H, H8, H16), 7.43 (d,  $J_{\text{H-H}} = 7.0$  Hz, 2H, H7), 7.46 (d,  $J_{\text{P-H}} = 7.5$  Hz, 2H, H14), 7.61 (d,  $J_{\text{H-H}} = 8.0$  Hz, 2H, H10), 7.66 (dd,  $J_{\text{P-H}} = 12.5$  Hz,  $J_{\text{H-H}} = 1.5$  Hz, 1H, H3), 7.73 (d,  $J_{\text{H-H}} = 7.0$  Hz, 2H, H6).

$^{13}\text{C}$  (125 MHz,  $\text{CDCl}_3$ )

126.6 (d,  $J_{\text{P-C}} = 1.3$  Hz, CH, C6), 126.8 (d,  $J_{\text{P-C}} = 9.5$  Hz, CH, C10), 127.5 (CH, C12), 128.0 (CH, C1), 128.2 (CH, C8), 128.8 (CH, C7), 128.8 (d,  $J_{\text{P-C}} = 6.6$  Hz, CH, C15), 128.9 (CH, C11), 129.7 (d,  $J_{\text{P-C}} = 1.5$  Hz, CH, C16), 130.8 (d,  $J_{\text{P-C}} = 9.9$  Hz, C, C13), 131.9 (d,  $J_{\text{P-C}} = 10.3$

Hz, CH, C3), 134.0 (d,  $J_{P-C} = 19.5$  Hz, CH, C14), 136.5 (d,  $J_{P-C} = 15.9$  Hz, C, C9), 137.0 (d,  $J_{P-C} = 3.0$  Hz, C, C5), 150.4 (d,  $J_{P-C} = 7.8$  Hz, C, C2), 153.8 (d,  $J_{P-C} = 2.0$  Hz, C, C4).

$^{31}\text{P}$  (200 MHz,  $\text{CDCl}_3$ )  
11.3.

HRMS (EI) for  $\text{C}_{22}\text{H}_{17}\text{P}$  : calc. (m/z) 312.1068 ; found (m/z) 312.1068.

Melting point: 124°C

### 2,4-bis(4-methylphenyl)-1-phenylphosphole (3b)

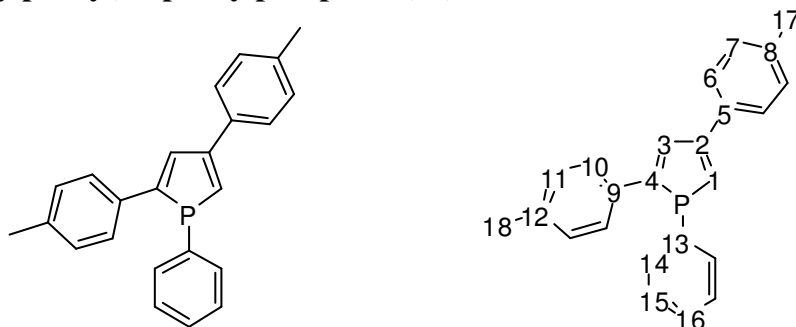

According to the general procedure using 4-methylphenylacetylene (464 mg, 4.0 mmol) and dichlorophenylphosphine (0.14 mL, 1.0 mmol), **3b** was obtained as a yellow solid in 60.9 % yield (0.61 mmol, 207 mg).

$^1\text{H}$  (500 MHz,  $\text{CDCl}_3$ )  
2.36 (s, 3H, H18), 2.44 (s, 3H, H17), 7.03 (dd,  $J_{P-H} = 40.0$  Hz,  $J_{H-H} = 1.5$  Hz, 1H, H1), 7.15 (d,  $J_{H-H} = 8.0$  Hz, 2H, H11), 7.28 (m, 5H, H7, H15, H16), 7.47 (ddd,  $J_{P-H} = 8.5$  Hz,  $J_{H-H} = 8.5$  Hz,  $J_{H-H} = 1.5$  Hz, 2H, H14), 7.55 (d,  $J_{H-H} = 7.5$  Hz, 2H, H10), 7.64 (dd,  $J_{P-H} = 13.0$  Hz,  $J_{H-H} = 1.5$  Hz, 1H, H3), 7.71 (d,  $J_{H-H} = 8.0$  Hz, 2H, H6).

$^{13}\text{C}$  (125 MHz,  $\text{CDCl}_3$ )  
21.3 (CH<sub>3</sub>, C17), 21.3 (CH<sub>3</sub>, C18), 126.3 (CH, C1), 126.4 (d,  $J_{P-C} = 0.9$  Hz, CH, C6), 126.6 (d,  $J_{P-C} = 9.4$  Hz, CH, C10), 128.7 (d,  $J_{P-C} = 8.4$  Hz, CH, C15), 129.5 (CH, 2C, C7, C11), 129.5 (d,  $J_{P-C} = 1.3$  Hz, CH, C16), 131.2 (d,  $J_{P-C} = 10.1$  Hz, CH, C3), 131.2 (d,  $J_{P-C} = 10.3$  Hz, C, C13), 133.7 (d,  $J_{P-C} = 16.0$  Hz, C, C9), 134.0 (d,  $J_{P-C} = 19.4$  Hz, CH, C14), 134.2 (d,  $J_{P-C} = 3.1$  Hz, C, C5), 137.3 (C, C12), 137.9 (C, C8), 150.3 (d,  $J_{P-C} = 7.9$  Hz, C, C2), 153.6 (d,  $J_{P-C} = 1.6$  Hz, C, C4).

$^{31}\text{P}$  (200 MHz,  $\text{CDCl}_3$ )  
10.8.

HRMS (EI) for  $\text{C}_{24}\text{H}_{21}\text{P}$  : calc. (m/z) 340.1381 ; found (m/z) 340.1381.

### 2,4-bis(4-chlorophenyl)-1-phenylphosphole (3c)

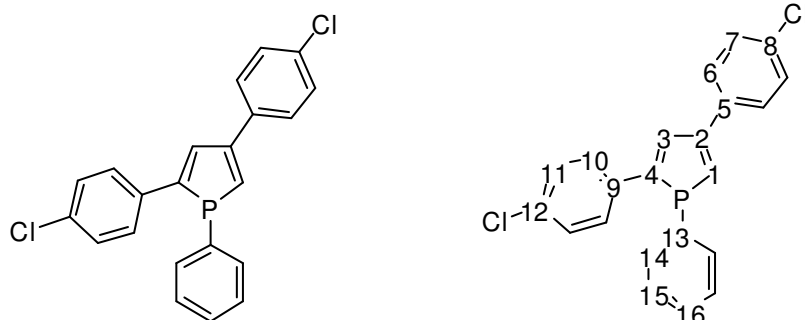

According to the general procedure using 4-chlorophenylacetylene (476 mg, 4.0 mmol) and dichlorophenylphosphine (0.24 mL, 1.7 mmol), **3c** was obtained as a light yellow solid in 45.7 % yield (0.78 mmol, 295 mg).

$^1\text{H}$  (500 MHz,  $\text{CDCl}_3$ )

7.09 (d,  $J_{\text{P-H}} = 38.0$  Hz, 1H, H1), 7.29-7.32 (m, 3H, H11, H16), 7.34-7.35 (m, 2H, H15), 7.38-7.44 (m, 4H, H7, H14), 7.53 (d,  $J_{\text{H-H}} = 8.5$  Hz, 2H, H10), 7.57 (d,  $J_{\text{P-H}} = 12.5$  Hz, 1H, H3), 7.64 (d,  $J_{\text{H-H}} = 8.0$  Hz, 2H, H6).

$^{13}\text{C}$  (125 MHz,  $\text{CDCl}_3$ )

127.7 (CH, C11), 127.8 (d,  $J_{\text{P-C}} = 1.3$  Hz, CH, C6), 127.9 (d,  $J_{\text{P-C}} = 9.4$  Hz, CH, C10), 128.6 (d,  $J_{\text{P-C}} = 1.0$  Hz, CH, C1), 128.9 (d,  $J_{\text{P-C}} = 3.3$  Hz, CH, C15), 129.0 (d,  $J_{\text{P-C}} = 2.0$  Hz, CH, C7), 130.0 (d,  $J_{\text{P-C}} = 1.5$  Hz, CH, C16), 131.7 (d,  $J_{\text{P-C}} = 10.4$  Hz, CH, C3), 133.4 (d,  $J_{\text{P-C}} = 0.9$  Hz, C, C5), 134.0 (d,  $J_{\text{P-C}} = 19.6$  Hz, CH, C14), 134.0 (C, C8), 134.8 (d,  $J_{\text{P-C}} = 16.4$  Hz, C, C9), 135.2 (d,  $J_{\text{P-C}} = 3.0$  Hz, C, C13), 135.8 (C, C12), 149.0 (d,  $J_{\text{P-C}} = 7.8$  Hz, C, C2), 152.9 (d,  $J_{\text{P-C}} = 2.1$  Hz, C, C4).

$^{31}\text{P}$  (200 MHz,  $\text{CDCl}_3$ )

12.3.

HRMS (EI) for  $\text{C}_{22}\text{H}_{15}\text{Cl}_2\text{P}$  : calc. (m/z) 380.0288 ; found (m/z) 380.0288.

### 2,4-bis(4-fluorophenyl)-1-phenylphosphole (**3d**)

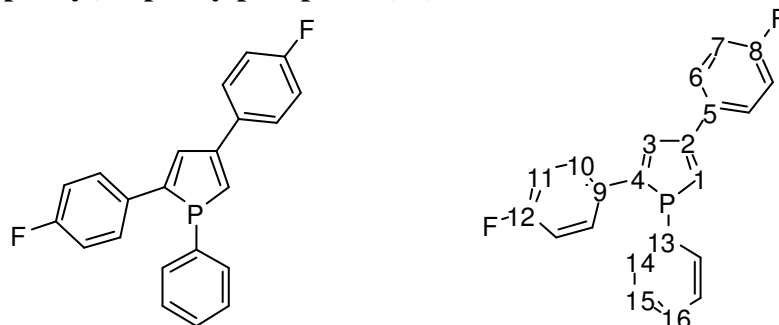

According to the general procedure using 4-fluorophenylacetylene (480 mg, 4.0 mmol) and dichlorophenylphosphine (0.20 mL, 1.4 mmol), **3d** was obtained as a light yellow oil in 48.0 % yield (0.67 mmol, 234 mg).

$^1\text{H}$  (500 MHz,  $\text{CDCl}_3$ )

6.97 (dd,  $J_{\text{P-H}} = 39.0$  Hz,  $J_{\text{H-H}} = 1.5$  Hz, 1H, H1), 6.98 (dd,  $J_{\text{H-H}} = 8.0$  Hz,  $J_{\text{F-H}} = 8.0$  Hz, 2H, H11), 7.11 (dd,  $J_{\text{H-H}} = 8.5$  Hz,  $J_{\text{F-H}} = 8.5$  Hz, 2H, H7), 7.24-7.30 (m, 3H, H15, H16), 7.38 (ddd,  $J_{\text{P-H}} = 8.5$  Hz,  $J_{\text{H-H}} = 8.5$  Hz,  $J_{\text{H-H}} = 1.5$  Hz, 2H, H14), 7.48 (dd,  $J_{\text{P-H}} = 12.5$  Hz,  $J_{\text{H-H}} = 1.5$  Hz, 1H, H3), 7.52 (dd,  $J_{\text{H-H}} = 7.5$  Hz,  $J_{\text{F-H}} = 5.5$  Hz, 2H, H10), 7.67 (dd,  $J_{\text{H-H}} = 8.5$  Hz,  $J_{\text{F-H}} = 5.0$  Hz, 2H, H6).

$^{13}\text{C}$  (125 MHz,  $\text{CDCl}_3$ )

115.7 (d,  $J_{\text{P-C}} = 2.9$  Hz, CH, C11), 115.9 (d,  $J_{\text{P-C}} = 3.0$  Hz, CH, C7), 127.4 (CH, C1), 128.2 (dd,  $J_{\text{P-C}} = 9.1$  Hz,  $J_{\text{F-C}} = 8.1$  Hz, CH, C10), 128.2 (dd,  $J_{\text{P-C}} = 3.8$  Hz,  $J_{\text{F-C}} = 10.4$  Hz, CH, C6), 128.9 (d,  $J_{\text{P-C}} = 8.5$  Hz, CH, C15), 129.9 (d,  $J_{\text{P-C}} = 1.4$  Hz, CH, C16), 130.4 (d,  $J_{\text{P-C}} = 9.6$  Hz, C, C13), 131.5 (dd,  $J_{\text{P-C}} = 10.1$  Hz, CH, C3), 132.6 (dd,  $J_{\text{P-C}} = 16.3$  Hz,  $J_{\text{F-C}} = 3.5$  Hz, C, C9), 133.1 (dd,  $J_{\text{P-C}} = 3.3$  Hz,  $J_{\text{F-C}} = 3.3$  Hz, C, C5), 134.0 (d,  $J_{\text{P-C}} = 19.5$  Hz, CH, C14), 149.3 (d,  $J_{\text{P-C}} = 7.6$  Hz, C, C2), 153.1 (d,  $J_{\text{P-C}} = 1.8$  Hz, C, C4), 161.6 (d,  $J_{\text{F-C}} = 33.1$  Hz, C, C12), 163.6 (d,  $J_{\text{F-C}} = 33.8$  Hz, C, C8).

$^{19}\text{F}$  (470 MHz,  $\text{CDCl}_3$ )

-113.7, -114.6.

$^{31}\text{P}$  (200 MHz,  $\text{CDCl}_3$ )

11.9.

HRMS (EI) for  $\text{C}_{22}\text{H}_{15}\text{F}_2\text{P}$  : calc. (m/z) 348.0879 ; found (m/z) 348.0879.

### 2,4-bis(4-methoxyphenyl)-1-phenylphosphole (3e)

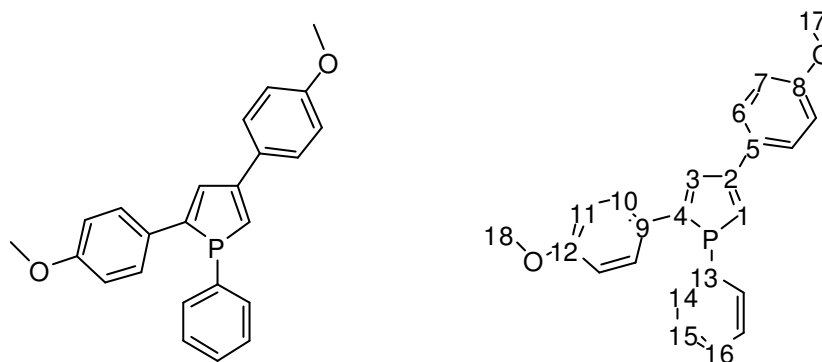

According to the general procedure using 4-methoxyphenylacetylene (0.46 mL, 4.0 mmol) and dichlorophenylphosphine (0.20 mL, 1.4 mmol), **3e** was obtained as a yellow solid in 36.5 % yield (0.51 mmol, 190 mg).

$^1\text{H}$  (500 MHz,  $\text{CDCl}_3$ )

3.81 (s, 3H, H18), 3.88 (s, 3H, H17), 6.88 (d,  $J_{\text{H-H}} = 8.0$  Hz, 2H, H11), 6.91 (d,  $J_{\text{P-H}} = 38.0$  Hz, 1H, H1), 7.00 (d,  $J_{\text{H-H}} = 8.0$  Hz, 2H, H7), 7.30 (m, 3H, H15, H16), 7.47 (ddd,  $J_{\text{P-H}} = 8.0$  Hz,  $J_{\text{H-H}} = 8.0$  Hz,  $J_{\text{H-H}} = 1.5$  Hz, 2H, H14), 7.56 (d,  $J_{\text{P-H}} = 11.0$  Hz, 1H, H3), 7.58 (d,  $J_{\text{H-H}} = 7.0$  Hz, 2H, H10), 7.70 (d,  $J_{\text{H-H}} = 8.0$  Hz, 2H, H6).

$^{13}\text{C}$  (125 MHz,  $\text{CDCl}_3$ )

55.3 (CH<sub>3</sub>, C18), 55.4 (CH<sub>3</sub>, C17), 114.1 (CH, C11), 114.2 (CH, C7), 124.5 (CH, C1), 127.7 (CH, C6), 127.8 (d,  $J_{\text{P-C}} = 9.4$  Hz, CH, C10), 128.7 (d,  $J_{\text{P-C}} = 8.4$  Hz, CH, C15), 129.4 (d,  $J_{\text{P-C}} = 16.4$  Hz, C, C9), 129.5 (d,  $J_{\text{P-C}} = 1.0$  Hz, CH, C16), 129.8 (d,  $J_{\text{P-C}} = 3.3$  Hz, C, C5), 130.2 (d,  $J_{\text{P-C}} = 10.0$  Hz, CH, C3), 131.5 (d,  $J_{\text{P-C}} = 10.9$  Hz, C, C13), 133.9 (d,  $J_{\text{P-C}} = 19.4$  Hz, CH, C14), 150.0 (d,  $J_{\text{P-C}} = 7.6$  Hz, C, C2), 153.3 (d,  $J_{\text{P-C}} = 1.8$  Hz, C, C4), 159.2 (C, C12), 159.6 (C, C8).

$^{31}\text{P}$  (200 MHz,  $\text{CDCl}_3$ )

10.6.

HRMS (EI) for  $\text{C}_{24}\text{H}_{21}\text{O}_2\text{P}$  : calc. (m/z) 372.1279 ; found (m/z) 372.1279.

### 2,4-bis(2-naphthyl)-1-phenylphosphole (3f)

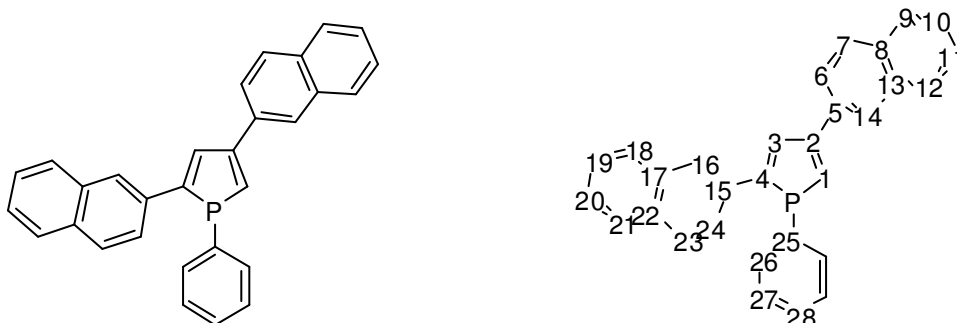

According to the general procedure using 2-naphthylacetylene (304 mg, 4.0 mmol) and dichlorophenylphosphine (0.20 mL, 1.4 mmol), **3f** was obtained as a yellow solid in 24.3 % yield (0.34 mmol, 140 mg).

$^1\text{H}$  (500 MHz,  $\text{CDCl}_3$ )

7.27 (d,  $J_{\text{P-H}} = 38.0$  Hz, 1H, H1), 7.29 (d,  $J_{\text{H-H}} = 6.0$  Hz, 3H, H27, H28), 7.45-7.49 (m, 3H, H19, H20, H23), 7.51-7.58 (m, 3H, H7, H26), 7.53 (d,  $J_{\text{H-H}} = 8.5$  Hz, 1H, H10), 7.82-7.85 (m, 3H, H18, H21, H24), 7.90 (d,  $J_{\text{H-H}} = 4.0$  Hz, 2H, H6, H11), 7.93-7.97 (m, 2H, H12), 7.95 (d,  $J_{\text{P-H}} = 13.5$  Hz, 1H, H3), 8.10 (s, 1H, H16), 8.24 (s, 1H, H14).

$^{13}\text{C}$  (125 MHz,  $\text{CDCl}_3$ )

124.7 (CH, C6), 125.0 (d,  $J_{\text{P-C}} = 8.3$  Hz, CH, C24), 125.4 (d,  $J_{\text{P-C}} = 1.6$  Hz, CH, C14), 125.6 (d,  $J_{\text{P-C}} = 10.8$  Hz, CH, C16), 125.9 (CH, C7), 126.3 (CH, C23), 126.4 (CH, C19), 126.4 (CH, C20), 127.8 (CH, C10), 127.8 (CH, C11), 128.2 (CH, C18), 128.4 (CH, C9), 128.4 (CH, C21), 128.5 (CH, C12), 128.6 (CH, C1), 128.8 (d,  $J_{\text{P-C}} = 8.8$  Hz, CH, C27), 129.7 (d,  $J_{\text{P-C}} = 1.2$  Hz, CH, C28), 130.8 (d,  $J_{\text{P-C}} = 10.0$  Hz, C, C25), 132.3 (d,  $J_{\text{P-C}} = 10.3$  Hz, CH, C3), 132.9 (C, C17), 133.1 (C, C13), 133.6 (d,  $J_{\text{P-C}} = 11.9$  Hz, C, C15), 133.9 (d,  $J_{\text{P-C}} = 19.3$  Hz, CH, C26), 134.0 (C, C17), 134.1 (C, C13), 134.2 (d,  $J_{\text{P-C}} = 2.9$  Hz, C, C5), 150.3 (d,  $J_{\text{P-C}} = 7.7$  Hz, C, C2), 153.8 (d,  $J_{\text{P-C}} = 1.8$  Hz, C, C4).

$^{31}\text{P}$  (200 MHz,  $\text{CDCl}_3$ )

11.7.

HRMS (EI) for  $C_{30}H_{21}P$  : calc. (m/z) 412.1381 ; found (m/z) 412.1381.

### 1-phenyl-2,4-bis(2-thienyl)phosphole (3g)

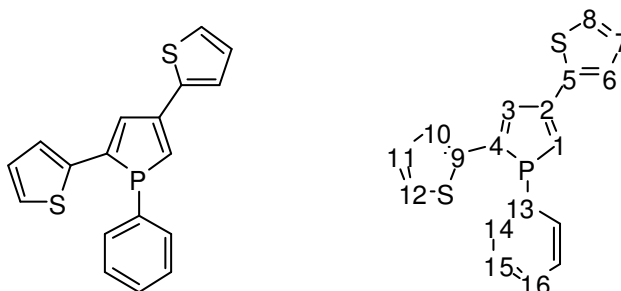

According to the general procedure using 2-thienylacetylene (0.38 mL, 4.0 mmol) and dichlorophenylphosphine (0.14 mL, 1.0 mmol), **3g** was obtained as a yellow solid in 57.1 % yield (0.57 mmol, 185 mg).

$^1H$  (500 MHz,  $CDCl_3$ )

6.88 (dd,  $J_{P-H} = 38.5$  Hz,  $J_{H-H} = 1.5$  Hz, 1H, H1), 6.94 (dd,  $J_{H-H} = 5.0$  Hz,  $J_{H-H} = 3.5$  Hz, 1H, H11), 7.08 (d,  $J_{H-H} = 3.5$  Hz, 1H, H10), 7.10 (dd,  $J_{H-H} = 5.0$  Hz,  $J_{H-H} = 3.5$  Hz, 1H, H7), 7.17 (d,  $J_{H-H} = 5.0$  Hz, 1H, H12), 7.30-7.33 (m, 4H, H8, H15, H16), 7.37 (d,  $J_{H-H} = 3.5$  Hz, 2H, H6), 7.43 (dd,  $J_{P-H} = 11.5$  Hz,  $J_{H-H} = 1.5$  Hz, 1H, H3), 7.50 (ddd,  $J_{P-H} = 8.0$  Hz,  $J_{H-H} = 8.0$  Hz,  $J_{H-H} = 1.5$  Hz, 2H, H14).

$^{13}C$  (125 MHz,  $CDCl_3$ )

124.7 (d,  $J_{P-C} = 3.5$  Hz, CH, C12), 124.8 (d,  $J_{P-C} = 1.6$  Hz, CH, C6), 124.9 ( $J_{P-C} = 0.5$  Hz CH, C1), 125.1 (d,  $J_{P-C} = 7.3$  Hz, CH, C10), 125.5 (d,  $J_{P-C} = 0.6$  Hz, CH, C8), 127.9 (CH, C7), 127.9 (CH, C11), 128.9 (d,  $J_{P-C} = 8.6$  Hz, CH, C15), 130.0 (d,  $J_{P-C} = 1.5$  Hz, CH, C16), 130.5 (d,  $J_{P-C} = 9.1$  Hz, CH, C3), 130.8 (d,  $J_{P-C} = 11.8$  Hz, C, C13), 134.2 (d,  $J_{P-C} = 20.4$  Hz, CH, C14), 139.9 (d,  $J_{P-C} = 20.1$  Hz, C, C9), 140.8 (d,  $J_{P-C} = 2.9$  Hz, C, C5), 143.8 (d,  $J_{P-C} = 7.8$  Hz, C, C2), 147.0 (d,  $J_{P-C} = 4.4$  Hz, C, C4).

$^{31}P$  (200 MHz,  $CDCl_3$ )

13.4.

HRMS (EI) for  $C_{18}H_{13}PS_2$  : calc. (m/z) 324.0196 ; found (m/z) 324.0196.

### 2,4-bis(1-pentyl)-1-phenylphosphole (3h)

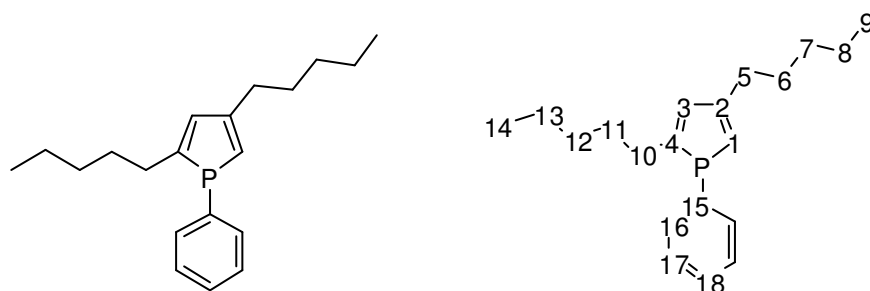

According to the general procedure using 1-heptyne (0.52 mL, 4.0 mmol) and dichlorophenylphosphine (0.14 mL, 1.0 mmol), **3h** was obtained as a colourless oil in 63.3 % yield (0.63 mmol, 190 mg).

$^1\text{H}$  (500 MHz,  $\text{CDCl}_3$ )

0.84 (t,  $J_{\text{H-H}} = 7.0$  Hz, 3H, H9), 0.91 (t,  $J_{\text{H-H}} = 7.0$  Hz, 3H, H14), 1.23-1.26 (m, 4H, H8, H13), 1.35 (dd,  $J_{\text{H-H}} = 7.5$  Hz,  $J_{\text{H-H}} = 3.5$  Hz, 4H, H7, H12), 1.43-1.50 (m, 2H, H11), 1.58-1.63 (m, 2H, H6), 2.37 (t,  $J_{\text{H-H}} = 8.5$  Hz, 2H, H10), 2.45 (t,  $J_{\text{H-H}} = 7.5$  Hz, 2H, H5), 6.23 (dd,  $J_{\text{P-H}} = 40.5$  Hz,  $J_{\text{H-H}} = 1.5$  Hz, 1H, H1), 6.48 (dd,  $J_{\text{P-H}} = 14.5$  Hz,  $J_{\text{H-H}} = 1.5$  Hz, 1H, H3), 7.27-7.32 (m, 5H, H16, H17, H18).

$^{13}\text{C}$  (125 MHz,  $\text{CDCl}_3$ )

14.1 ( $\text{CH}_3$ , C14), 14.2 ( $\text{CH}_3$ , C9), 22.6 ( $\text{CH}_2$ , C8), 22.7 ( $\text{CH}_2$ , C13), 28.7 (d,  $J_{\text{P-C}} = 2.1$  Hz,  $\text{CH}_2$ , C6), 30.5 ( $\text{CH}_2$ , C7), 30.6 ( $\text{CH}_2$ , C12), 30.8 (d,  $J_{\text{P-C}} = 6.6$  Hz,  $\text{CH}_2$ , C11), 31.7 (d,  $J_{\text{P-C}} = 9.0$  Hz,  $\text{CH}_2$ , C10), 33.5 (d,  $J_{\text{P-C}} = 3.4$  Hz,  $\text{CH}_2$ , C5), 124.1 (CH, C1), 128.6 (d,  $J_{\text{P-C}} = 8.1$  Hz, CH, C17), 129.2 (d,  $J_{\text{P-C}} = 1.1$  Hz, CH, C18), 130.7 (d,  $J_{\text{P-C}} = 10.4$  Hz, C, C15), 133.7 (d,  $J_{\text{P-C}} = 19.0$  Hz, CH, C16), 134.3 (d,  $J_{\text{P-C}} = 10.9$  Hz, CH, C3), 154.4 (d,  $J_{\text{P-C}} = 7.8$  Hz, C, C2), 156.3 (d,  $J_{\text{P-C}} = 4.6$  Hz, C, C4).

$^{31}\text{P}$  (200 MHz,  $\text{CDCl}_3$ )

8.1.

HRMS (ESI) for  $\text{C}_{20}\text{H}_{29}\text{P}$  [ $\text{M}+\text{H}$ ]: calc. (m/z) 301.2007 ; found (m/z) 301.2079.

### 2,4-bis(tert-butyl)-1-phenylphosphole (3i)

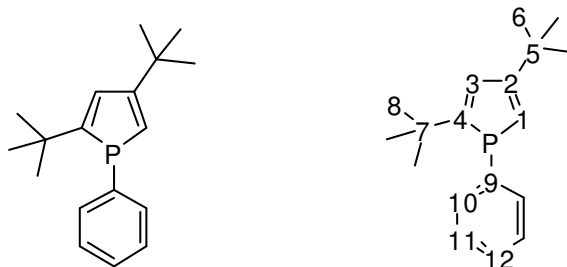

According to the general procedure using tert-butylacetylene (0.48 mL, 4.0 mmol) and dichlorophenylphosphine (0.20 mL, 1.4 mmol), **3i** was obtained as a colourless oil in 47.3 % yield (0.66 mmol, 180 mg).



$^1\text{H}$  (500 MHz,  $\text{CDCl}_3$ )

1.10 (s, 9H, H8), 1.24 (s, 9H, H6), 6.24 (dd,  $J_{\text{P-H}} = 41.0$  Hz,  $J_{\text{H-H}} = 1.5$  Hz, 1H, H1), 6.75 (dd,  $J_{\text{P-H}} = 15.0$  Hz,  $J_{\text{H-H}} = 1.5$  Hz, 1H, H3), 7.23 (m, 2H, H10), 7.30 (m, 3H, H11, H12).

$^{13}\text{C}$  (125 MHz,  $\text{CDCl}_3$ )

29.8 (d,  $J_{\text{P-C}} = 1.9$  Hz,  $\text{CH}_3$ , C6), 32.4 (d,  $J_{\text{P-C}} = 5.9$  Hz,  $\text{CH}_3$ , C8), 34.7 (d,  $J_{\text{P-C}} = 2.8$  Hz, C, C5), 35.7 (d,  $J_{\text{P-C}} = 13.9$  Hz, C, C7), 122.7 (d,  $J_{\text{P-C}} = 1.3$  Hz, CH, C1), 128.2 (d,  $J_{\text{P-C}} = 8.6$  Hz, CH, C11), 129.3 (d,  $J_{\text{P-C}} = 1.6$  Hz, CH, C12), 130.9 (d,  $J_{\text{P-C}} = 10.8$  Hz, CH, C3), 132.2 (d,  $J_{\text{P-C}} = 10.8$  Hz, C, C9), 134.2 (d,  $J_{\text{P-C}} = 20.1$  Hz, CH, C10), 161.8 (d,  $J_{\text{P-C}} = 7.1$  Hz, C, C4), 165.8 (d,  $J_{\text{P-C}} = 9.1$  Hz, C, C2).

$^{31}\text{P}$  (200 MHz,  $\text{CDCl}_3$ )

1.4.

HRMS (EI) for  $\text{C}_{18}\text{H}_{25}\text{P}$  : calc. (m/z) 272.1694 ; found (m/z) 272.1694.

### 1-phenyl-2,4-bis(trimethylsilyl)phosphole (3j)

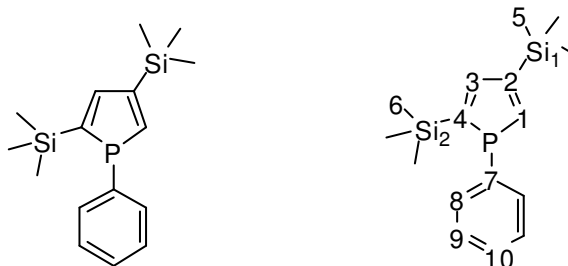

According to the general procedure using trimethylsilylacetylene (0.56 mL, 4.0 mmol) and dichlorophenylphosphine (0.14 mL, 1.0 mmol), **3j** was obtained as a colourless oil in 72.4 % yield (0.72 mmol, 220 mg).

$^1\text{H}$  (500 MHz,  $\text{CDCl}_3$ )

0.07 (s, 9H, H5), 0.27 (s, 9H, H6), 7.24-7.27 (m, 4H, H8, H9), 7.29 (dd,  $J_{\text{P-H}} = 18.5$  Hz,  $J_{\text{H-H}} = 1.0$  Hz, 1H, H3), 7.31-7.32 (m, 1H, H10), 7.43 (dd,  $J_{\text{P-H}} = 40.5$  Hz,  $J_{\text{H-H}} = 1.0$  Hz, 1H, H1).

$^{13}\text{C}$  (125 MHz,  $\text{CDCl}_3$ )

-0.9 ( $\text{CH}_3$ , C5), 0.2 (d,  $J_{\text{P-C}} = 2.7$  Hz,  $\text{CH}_3$ , C6), 128.4 (d,  $J_{\text{P-C}} = 8.8$  Hz, CH, C9), 129.6 (d,  $J_{\text{P-C}} = 1.8$  Hz, CH, C10), 130.3 (d,  $J_{\text{P-C}} = 9.0$  Hz, C, C7), 134.5 (d,  $J_{\text{P-C}} = 19.4$  Hz, CH, C8), 147.4 (d,  $J_{\text{P-C}} = 10.1$  Hz, CH, C3), 149.4 (d,  $J_{\text{P-C}} = 10.8$  Hz, CH, C1), 150.3 (d,  $J_{\text{P-C}} = 26.1$  Hz, C, C4), 154.8 (d,  $J_{\text{P-C}} = 5.5$  Hz, C, C2).

$^{29}\text{Si}$  (100 MHz)

-7.04 (d,  $J_{\text{P-Si}} = 25.8$  Hz, Si2), -8.17 (d,  $J_{\text{P-Si}} = 8.0$  Hz, Si1)

$^{31}\text{P}$  (200 MHz,  $\text{CDCl}_3$ )

31.9.

HRMS (EI) for  $\text{C}_{16}\text{H}_{25}\text{PSi}_2$  : calc. (m/z) 304.1232 ; found (m/z) 304.1232.

### 1-cyclohexyl-2,4-diphenylphosphole (3k)

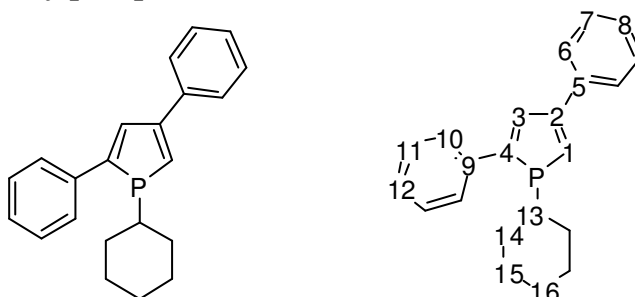

According to the general procedure using phenylacetylene (0.42 mL, 4.0 mmol) and dichlorocyclohexylphosphine (0.15 mL, 1.0 mmol), **3k** was obtained as a light yellow solid in 40.3 % yield (0.40 mmol, 128 mg).

$^1\text{H}$  (500 MHz,  $\text{CDCl}_3$ )

1.10-1.30 (m, 6H, H15, H16), 1.60-1.68 (m, 4H, H14), 2.09-2.14 (m, 1H, H13), 6.96 (dd,  $J_{\text{P-H}} = 36.5$  Hz,  $J_{\text{H-H}} = 1.0$  Hz, 1H, H1), 7.30-7.36 (m, 2H, H8, H12), 7.40-7.46 (m, 4H, H7, H11), 7.52 (dd,  $J_{\text{P-H}} = 11.5$  Hz,  $J_{\text{H-H}} = 1.0$  Hz, 1H, H3), 7.62 (d,  $J_{\text{H-H}} = 8.0$  Hz, 2H, H10), 7.70 (d,  $J_{\text{H-H}} = 7.5$  Hz, 2H, H6).

$^{13}\text{C}$  (125 MHz,  $\text{CDCl}_3$ )

26.1 ( $\text{CH}_2$ , 2C, C15, C16), 27.5 (d,  $J_{\text{P-C}} = 10.0$  Hz,  $\text{CH}_2$ , C14), 37.5 (d,  $J_{\text{P-C}} = 12.6$  Hz, CH, C13), 125.1 (d,  $J_{\text{P-C}} = 4.1$  Hz, CH, C1), 126.4 (CH, C11), 127.0 (d,  $J_{\text{P-C}} = 9.1$  Hz, CH, C6), 127.3 (CH, C8), 127.8 (CH, C12), 128.8 (d,  $J_{\text{P-C}} = 9.3$  Hz, CH, C10), 131.9 (d,  $J_{\text{P-C}} = 8.8$  Hz, CH, C3), 132.9 (CH, C7), 137.4 (d,  $J_{\text{P-C}} = 2.8$  Hz, C, C5), 137.9 (d,  $J_{\text{P-C}} = 15.8$  Hz, C, C9), 150.4 (d,  $J_{\text{P-C}} = 6.6$  Hz, C, C2), 152.3 (d,  $J_{\text{P-C}} = 4.6$  Hz, C, C4).

$^{31}\text{P}$  (200 MHz,  $\text{CDCl}_3$ )

26.3.

HRMS (EI) for  $\text{C}_{22}\text{H}_{23}\text{P}$  : calc. (m/z) 318.1537 ; found (m/z) 318.1537.

### 3,5-dimethyl-2,4-diphenyl-phenylphosphole (3l)

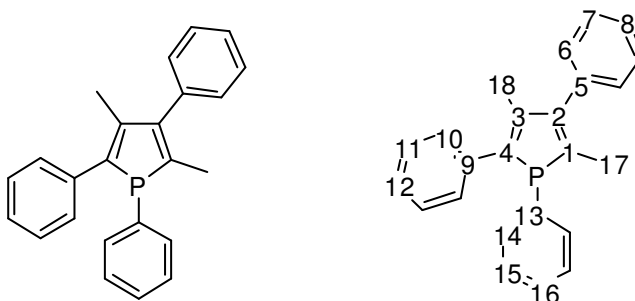

According to the general procedure using phenylpropyne (0.50 mL, 4.0 mmol) and dichlorophenylphosphine (0.28 mL, 2.0 mmol), **3l** was obtained as a colourless oil in 25 % yield (0.50 mmol, 169 mg). In addition a non-separable mixture of **3l** and **3m** (1 : 1) was obtained in 13 % yield (0.26 mmol, 89 mg).

$^1\text{H}$  (500 MHz,  $\text{CDCl}_3$ )

1.92 (d,  $J_{\text{P-H}} = 11.0$  Hz, 3H, H17), 1.98 (d,  $J_{\text{P-H}} = 3.0$  Hz, 3H, H18), 7.13-7.16 (m, 1H, H12), 7.23-7.24 (m, 3H, H15, H16), 7.25-7.29 (m, 4H, H7, H11), 7.30-7.35 (m, 3H, H8, H14), 7.36 (d,  $J_{\text{H-H}} = 7.5$  Hz, 2H, H10), 7.43 (dd,  $J_{\text{H-H}} = 7.5$  Hz,  $J_{\text{P-H}} = 1.5$  Hz, 2H, H6).

$^{13}\text{C}$  (125 MHz,  $\text{CDCl}_3$ )

14.0 (d,  $J_{\text{P-C}} = 20.4$  Hz,  $\text{CH}_3$ , C17), 16.8 (d,  $J_{\text{P-C}} = 1.8$  Hz,  $\text{CH}_3$ , C18), 126.1 (CH, C12), 127.1 (CH, C8), 128.3 (d,  $J_{\text{P-C}} = 2.3$  Hz, CH, 2C, C6, C7), 128.7 (d,  $J_{\text{P-C}} = 8.0$  Hz, CH, C15), 129.3 (d,  $J_{\text{P-C}} = 8.5$  Hz, CH, C10), 129.3 (CH, C16), 129.6 (d,  $J_{\text{P-C}} = 1.3$  Hz, CH, C11), 132.2 (d,  $J_{\text{P-C}} = 11.9$  Hz, C, C13), 133.6 (d,  $J_{\text{P-C}} = 18.6$  Hz, CH, C14), 137.8 (d,  $J_{\text{P-C}} = 17.9$  Hz, C, C9), 138.1 (d,  $J_{\text{P-C}} = 3.5$  Hz, C, C5), 142.2 (C, C4), 142.7 (C, C1), 143.1 (d,  $J_{\text{P-C}} = 11.8$  Hz, C, C3), 149.5 (d,  $J_{\text{P-C}} = 10.6$  Hz, C, C2).

$^{31}\text{P}$  (200 MHz,  $\text{CDCl}_3$ )

15.8

HRMS (EI) for  $\text{C}_{24}\text{H}_{21}\text{P}$  : calc. (m/z) 340.1381 ; found (m/z) 340.1381.

### 3,4-dimethyl-2,5-diphenyl-phenylphosphole (3m)

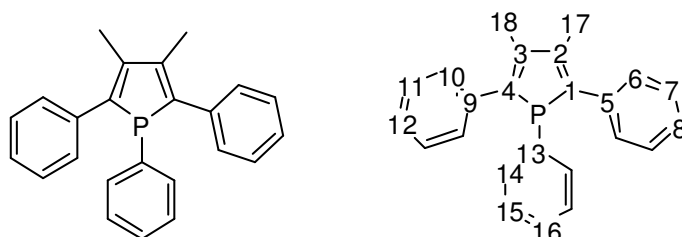

$^1\text{H}$  (500 MHz,  $\text{CDCl}_3$ )

2.10 (d,  $J_{\text{P-H}} = 2.5$  Hz, 6H, H17, H18), 6.91-6.97 (m, 2H, H8, H12), 7.01-7.07 (m, 2H, H14), 7.12-7.20 (m, 7H, H7, H11, H15, H16), 7.22-7.28 (m, 4H, H6, H10).

$^{13}\text{C}$  (125 MHz,  $\text{CDCl}_3$ )

15.4 (d,  $J_{\text{P-C}} = 1.3$  Hz,  $\text{CH}_3$ , 2C, C17, C18), 126.3 (CH, C8, C12), 128.3 (d,  $J_{\text{P-C}} = 12.4$  Hz, CH, C7, C11), 128.4 (d,  $J_{\text{P-C}} = 6.8$  Hz, CH, C6, C10), 128.9 (CH, C16), 129.4 (d,  $J_{\text{P-C}} = 8.4$  Hz, CH, C15), 131.9 (d,  $J_{\text{P-C}} = 12.3$  Hz, CH, C13), 133.1 (d,  $J_{\text{P-C}} = 18.0$  Hz, CH, C14), 137.6 (d,  $J_{\text{P-C}} = 17.6$  Hz, C, C5, C9), 143.5 (d,  $J_{\text{P-C}} = 11.8$  Hz, C, C2, C3), 144.9 (d,  $J_{\text{P-C}} = 1.5$  Hz, C, C1, C4).

$^{31}\text{P}$  (200 MHz,  $\text{CDCl}_3$ )

13.9

## II. Crystallographic data for **1b**, **3a**, **5a**

### Crystal data for **1b**

|                                             |                                                                          |
|---------------------------------------------|--------------------------------------------------------------------------|
| Compound                                    | bg237                                                                    |
| Molecular formula                           | C <sub>26</sub> H <sub>22</sub> Zr, 1/2(C <sub>4</sub> H <sub>8</sub> O) |
| Molecular weight                            | 461.71                                                                   |
| Crystal habit                               | Orange Block                                                             |
| Crystal dimensions(mm)                      | 0.40x0.16x0.10                                                           |
| Crystal system                              | triclinic                                                                |
| Space group                                 | P-1                                                                      |
| a(Å)                                        | 13.136(1)                                                                |
| b(Å)                                        | 13.406(1)                                                                |
| c(Å)                                        | 13.761(1)                                                                |
| α(°)                                        | 115.669(1)                                                               |
| β(°)                                        | 95.441(1)                                                                |
| γ(°)                                        | 95.918(1)                                                                |
| V(Å <sup>3</sup> )                          | 2146.1(3)                                                                |
| Z                                           | 4                                                                        |
| d(g-cm <sup>-3</sup> )                      | 1.429                                                                    |
| F(000)                                      | 952                                                                      |
| μ(cm <sup>-1</sup> )                        | 0.526                                                                    |
| Absorption corrections                      | multi-scan ; 0.8170 min, 0.9492 max                                      |
| Diffractometer                              | KappaCCD                                                                 |
| X-ray source                                | MoKα                                                                     |
| λ(Å)                                        | 0.71069                                                                  |
| Monochromator                               | graphite                                                                 |
| T (K)                                       | 150.0(1)                                                                 |
| Scan mode                                   | phi and omega scans                                                      |
| Maximum θ                                   | 30.03                                                                    |
| HKL ranges                                  | -18 17 ; -17 18 ; -19 19                                                 |
| Reflections measured                        | 23820                                                                    |
| Unique data                                 | 12382                                                                    |
| Rint                                        | 0.0348                                                                   |
| Reflections used                            | 10938                                                                    |
| Criterion                                   | I > 2σ(I)                                                                |
| Refinement type                             | Fsqd                                                                     |
| Hydrogen atoms                              | constr                                                                   |
| Parameters refined                          | 532                                                                      |
| Reflections / parameter                     | 20                                                                       |
| wR2                                         | 0.0789                                                                   |
| R1                                          | 0.0375                                                                   |
| Weights a, b                                | 0.0000 ; 3.0712                                                          |
| GoF                                         | 1.082                                                                    |
| difference peak / hole (e Å <sup>-3</sup> ) | 0.568(0.075) / -0.613(0.075)                                             |

### Crystal data for 3a

|                                             |                                     |
|---------------------------------------------|-------------------------------------|
| Compound                                    | fj373                               |
| Molecular formula                           | 'C <sub>22</sub> H <sub>17</sub> P' |
| Molecular weight                            | 312.33                              |
| Crystal habit                               | Yellow Block                        |
| Crystal dimensions(mm)                      | 0.30x0.20x0.15                      |
| Crystal system                              | monoclinic                          |
| Space group                                 | P2 <sub>1</sub> /c                  |
| a(Å)                                        | 5.884(1)                            |
| b(Å)                                        | 8.898(1)                            |
| c(Å)                                        | 30.968(1)                           |
| α(°)                                        | 90.00                               |
| β(°)                                        | 96.658(2)                           |
| γ(°)                                        | 90.00                               |
| V(Å <sup>3</sup> )                          | 1610.4(3)                           |
| Z                                           | 4                                   |
| d(g·cm <sup>-3</sup> )                      | 1.288                               |
| F(000)                                      | 656                                 |
| μ(cm <sup>-1</sup> )                        | 0.167                               |
| Absorption corrections                      | multi-scan ; 0.9515 min, 0.9753 max |
| Diffractometer                              | KappaCCD                            |
| X-ray source                                | MoKα                                |
| λ(Å)                                        | 0.71069                             |
| Monochromator                               | graphite                            |
| T (K)                                       | 150.0(1)                            |
| Scan mode                                   | phi and omega scans                 |
| Maximum θ                                   | 28.70                               |
| HKL ranges                                  | -6 7 ; -12 10 ; -38 41              |
| Reflections measured                        | 8866                                |
| Unique data                                 | 4031                                |
| Rint                                        | 0.0329                              |
| Reflections used                            | 3582                                |
| Criterion                                   | I > 2σ(I)                           |
| Refinement type                             | Fsqd                                |
| Hydrogen atoms                              | constr                              |
| Parameters refined                          | 208                                 |
| Reflections / parameter                     | 17                                  |
| wR2                                         | 0.1149                              |
| R1                                          | 0.0462                              |
| Weights a, b                                | 0.0483 ; 0.8203                     |
| GoF                                         | 1.055                               |
| difference peak / hole (e Å <sup>-3</sup> ) | 0.362(0.047) / -0.306(0.047)        |

### Crystal data for 5a

|                                             |                                     |
|---------------------------------------------|-------------------------------------|
| Compound                                    | fj_triphenylphosphol                |
| Molecular formula                           | 'C <sub>22</sub> H <sub>17</sub> P' |
| Molecular weight                            | 312.33                              |
| Crystal habit                               | Yellow Block                        |
| Crystal dimensions(mm)                      | 0.22x0.18x0.10                      |
| Crystal system                              | monoclinic                          |
| Space group                                 | P2 <sub>1</sub>                     |
| a(Å)                                        | 12.079(1)                           |
| b(Å)                                        | 5.832(1)                            |
| c(Å)                                        | 12.562(1)                           |
| α(°)                                        | 90.000(1)                           |
| β(°)                                        | 115.528(1)                          |
| γ(°)                                        | 90.000(1)                           |
| V(Å <sup>3</sup> )                          | 798.54(16)                          |
| Z                                           | 2                                   |
| d(g·cm <sup>-3</sup> )                      | 1.299                               |
| F(000)                                      | 328                                 |
| μ(cm <sup>-1</sup> )                        | 0.169                               |
| Absorption corrections                      | multi-scan ; 0.9638 min, 0.9833 max |
| Diffractometer                              | KappaCCD                            |
| X-ray source                                | MoKα                                |
| λ(Å)                                        | 0.71069                             |
| Monochromator                               | graphite                            |
| T (K)                                       | 150.0(1)                            |
| Scan mode                                   | phi and omega scans                 |
| Maximum θ                                   | 30.03                               |
| HKL ranges                                  | -10 16 ; -8 7 ; -17 17              |
| Reflections measured                        | 5707                                |
| Unique data                                 | 3917                                |
| Rint                                        | 0.0256                              |
| Reflections used                            | 3795                                |
| Criterion                                   | I > 2σ(I)                           |
| Refinement type                             | Fsqd                                |
| Hydrogen atoms                              | constr                              |
| Parameters refined                          | 209                                 |
| Reflections / parameter                     | 18                                  |
| wR2                                         | 0.0788                              |
| R1                                          | 0.0359                              |
| Flack's parameter                           | 0.17(8)                             |
| Weights a, b                                | 0.0000 ; 0.3882                     |
| GoF                                         | 1.064                               |
| difference peak / hole (e Å <sup>-3</sup> ) | 0.219(0.041) / -0.188(0.041)        |

### III. Details on DFT calculations of compounds **1a**, **1b**, **1d** and **1e**

#### Geometry, three lowest frequencies and thermochemistry of **1a**

| Center Number | Atomic Number | Atomic Type | Coordinates (Angstroms) |           |           |
|---------------|---------------|-------------|-------------------------|-----------|-----------|
|               |               |             | X                       | Y         | Z         |
| 1             | 40            | 0           | 0.839773                | -1.156427 | 0.035012  |
| 2             | 6             | 0           | -1.385991               | -1.262938 | 0.180932  |
| 3             | 6             | 0           | -1.917983               | -0.002141 | 0.062898  |
| 4             | 6             | 0           | -1.013893               | 1.164438  | -0.064460 |
| 5             | 6             | 0           | 0.349917                | 1.058601  | -0.129762 |
| 6             | 6             | 0           | 1.217637                | 2.254032  | -0.124287 |
| 7             | 6             | 0           | 0.857818                | 3.438519  | 0.563535  |
| 8             | 6             | 0           | 1.693068                | 4.557935  | 0.567742  |
| 9             | 6             | 0           | 2.919313                | 4.530701  | -0.109268 |
| 10            | 6             | 0           | 3.302142                | 3.366268  | -0.785238 |
| 11            | 6             | 0           | 2.467542                | 2.244989  | -0.785036 |
| 12            | 6             | 0           | 2.064135                | -2.850044 | -1.526514 |
| 13            | 6             | 0           | 2.419655                | -1.539145 | -1.968705 |
| 14            | 6             | 0           | 1.247844                | -0.924542 | -2.510722 |
| 15            | 6             | 0           | 0.170938                | -1.852456 | -2.387263 |
| 16            | 6             | 0           | 0.676577                | -3.040978 | -1.780169 |
| 17            | 6             | 0           | 0.598090                | -1.626769 | 2.563201  |
| 18            | 6             | 0           | 1.226220                | -0.348035 | 2.473533  |
| 19            | 6             | 0           | 2.533423                | -0.532510 | 1.929269  |
| 20            | 6             | 0           | 2.710874                | -1.920745 | 1.672514  |
| 21            | 6             | 0           | 1.511067                | -2.599980 | 2.053742  |
| 22            | 1             | 0           | -1.492497               | 2.147629  | -0.070798 |
| 23            | 1             | 0           | -0.077701               | 3.466343  | 1.113246  |
| 24            | 1             | 0           | 1.391546                | 5.450950  | 1.107554  |
| 25            | 1             | 0           | 3.569259                | 5.399995  | -0.102133 |
| 26            | 1             | 0           | 4.251468                | 3.331274  | -1.311918 |
| 27            | 1             | 0           | 2.773258                | 1.349652  | -1.317366 |
| 28            | 1             | 0           | 2.736186                | -3.576348 | -1.092971 |
| 29            | 1             | 0           | 3.411100                | -1.109266 | -1.940895 |
| 30            | 1             | 0           | 1.189247                | 0.057003  | -2.954762 |
| 31            | 1             | 0           | -0.846762               | -1.687322 | -2.704137 |
| 32            | 1             | 0           | 0.105107                | -3.931543 | -1.559776 |
| 33            | 1             | 0           | -0.386914               | -1.822612 | 2.956670  |
| 34            | 1             | 0           | 0.797462                | 0.594002  | 2.777036  |
| 35            | 1             | 0           | 3.255083                | 0.250173  | 1.744480  |
| 36            | 1             | 0           | 3.602884                | -2.384036 | 1.276345  |
| 37            | 1             | 0           | 1.343788                | -3.667022 | 2.008259  |
| 38            | 1             | 0           | -2.068615               | -2.114772 | 0.216679  |
| 39            | 6             | 0           | -3.390216               | 0.250352  | 0.024716  |
| 40            | 6             | 0           | -3.939809               | 1.256193  | -0.796889 |
| 41            | 6             | 0           | -4.275088               | -0.523655 | 0.802972  |
| 42            | 6             | 0           | -5.320761               | 1.472299  | -0.844454 |
| 43            | 1             | 0           | -3.284052               | 1.856319  | -1.419495 |
| 44            | 6             | 0           | -5.654307               | -0.307472 | 0.757343  |
| 45            | 1             | 0           | -3.868757               | -1.285819 | 1.460393  |
| 46            | 6             | 0           | -6.184800               | 0.692737  | -0.067354 |
| 47            | 1             | 0           | -5.721395               | 2.246685  | -1.491828 |
| 48            | 1             | 0           | -6.314808               | -0.911756 | 1.372095  |
| 49            | 1             | 0           | -7.256261               | 0.863659  | -0.100823 |

Harmonic frequencies (cm<sup>-1</sup>), IR intensities (KM/Mole), Raman scattering activities (A<sup>4</sup>/AMU), depolarization ratios for plane and unpolarized incident light, reduced masses (AMU), force constants (mDyne/A), and normal coordinates:

|                | 1<br>A  | 2<br>A  | 3<br>A  |
|----------------|---------|---------|---------|
| Frequencies -- | 27.4444 | 31.4898 | 34.8488 |
| Red. masses -- | 3.9262  | 3.5015  | 4.7318  |
| Frc consts --  | 0.0017  | 0.0020  | 0.0034  |
| IR Inten --    | 0.0898  | 0.0210  | 0.1548  |

Sum of electronic and zero-point Energies= -1049.969302  
 Sum of electronic and thermal Energies= -1049.945737

Sum of electronic and thermal Enthalpies= -1049.944792  
 Sum of electronic and thermal Free Energies= -1050.024931

HF=-1050.3666336

**Geometry, three lowest frequencies and thermochemistry of 1b (monomer)**

| Center Number | Atomic Number | Atomic Type | Coordinates (Angstroms) |           |           |
|---------------|---------------|-------------|-------------------------|-----------|-----------|
|               |               |             | X                       | Y         | Z         |
| 1             | 40            | 0           | -0.000288               | -0.662840 | 0.000235  |
| 2             | 6             | 0           | 3.742734                | 0.026978  | -0.649235 |
| 3             | 6             | 0           | 5.139925                | 0.058320  | -0.655201 |
| 4             | 6             | 0           | 5.822999                | 1.142589  | -0.092455 |
| 5             | 6             | 0           | 5.090176                | 2.191272  | 0.479440  |
| 6             | 6             | 0           | 3.694532                | 2.160536  | 0.481514  |
| 7             | 6             | 0           | 2.980203                | 1.081796  | -0.095881 |
| 8             | 6             | 0           | 1.507661                | 1.025313  | -0.101155 |
| 9             | 6             | 0           | 0.730755                | 2.156436  | -0.044565 |
| 10            | 6             | 0           | -0.731114               | 2.156521  | 0.041945  |
| 11            | 6             | 0           | -1.508005               | 1.025478  | 0.100020  |
| 12            | 6             | 0           | -2.980552               | 1.081813  | 0.094876  |
| 13            | 6             | 0           | -3.695005               | 2.159834  | -0.483699 |
| 14            | 6             | 0           | -5.090653               | 2.190430  | -0.481613 |
| 15            | 6             | 0           | -5.823335               | 1.142302  | 0.091478  |
| 16            | 6             | 0           | -5.140128               | 0.058736  | 0.655422  |
| 17            | 6             | 0           | -3.742936               | 0.027533  | 0.649445  |
| 18            | 6             | 0           | 0.558659                | -2.630461 | 1.601020  |
| 19            | 6             | 0           | -0.750454               | -2.166726 | 1.943762  |
| 20            | 6             | 0           | -0.620708               | -0.859153 | 2.505009  |
| 21            | 6             | 0           | 0.763093                | -0.511856 | 2.485647  |
| 22            | 6             | 0           | 1.490854                | -1.609253 | 1.934867  |
| 23            | 6             | 0           | 0.620127                | -0.861544 | -2.504499 |
| 24            | 6             | 0           | -0.764232               | -0.516798 | -2.485204 |
| 25            | 6             | 0           | -1.489867               | -1.614829 | -1.932725 |
| 26            | 6             | 0           | -0.555643               | -2.633959 | -1.597942 |
| 27            | 6             | 0           | 0.752457                | -2.168264 | -1.941736 |
| 28            | 1             | 0           | 3.223431                | -0.818182 | -1.089794 |
| 29            | 1             | 0           | 5.695597                | -0.763479 | -1.097527 |
| 30            | 1             | 0           | 6.908120                | 1.166623  | -0.090073 |
| 31            | 1             | 0           | 5.609411                | 3.030617  | 0.932935  |
| 32            | 1             | 0           | 3.144525                | 2.968944  | 0.952421  |
| 33            | 1             | 0           | 1.193849                | 3.147976  | -0.061748 |
| 34            | 1             | 0           | -1.194188               | 3.148093  | 0.058021  |
| 35            | 1             | 0           | -3.145060               | 2.967745  | -0.955534 |
| 36            | 1             | 0           | -5.609998               | 3.029211  | -0.936024 |
| 37            | 1             | 0           | -6.908459               | 1.166193  | 0.089082  |
| 38            | 1             | 0           | -5.695709               | -0.762619 | 1.098690  |
| 39            | 1             | 0           | -3.223509               | -0.817065 | 1.090935  |
| 40            | 1             | 0           | 0.797713                | -3.596997 | 1.181461  |
| 41            | 1             | 0           | -1.667038               | -2.731118 | 1.844916  |
| 42            | 1             | 0           | -1.422564               | -0.246891 | 2.887217  |
| 43            | 1             | 0           | 1.189963                | 0.415262  | 2.835117  |
| 44            | 1             | 0           | 2.560500                | -1.645521 | 1.787501  |
| 45            | 1             | 0           | 1.420829                | -0.248429 | -2.887774 |
| 46            | 1             | 0           | -1.193041               | 0.408995  | -2.835829 |
| 47            | 1             | 0           | -2.559473               | -1.653066 | -1.785581 |
| 48            | 1             | 0           | -0.792843               | -3.600362 | -1.177015 |
| 49            | 1             | 0           | 1.670212                | -2.730595 | -1.842005 |

Harmonic frequencies (cm<sup>-1</sup>), IR intensities (KM/Mole), Raman scattering activities (A<sup>4</sup>/AMU), depolarization ratios for plane and unpolarized incident light, reduced masses (AMU), force constants (mDyne/A), and normal coordinates:

|                | 1       | 2       | 3       |
|----------------|---------|---------|---------|
|                | A       | A       | A       |
| Frequencies -- | 21.5373 | 31.5347 | 38.4799 |
| Red. masses -- | 3.8242  | 4.7774  | 4.2532  |
| Frc consts --  | 0.0010  | 0.0028  | 0.0037  |
| IR Inten --    | 0.2220  | 0.1606  | 0.0238  |



Sum of electronic and zero-point Energies= -1049.973364  
Sum of electronic and thermal Energies= -1049.949773  
Sum of electronic and thermal Enthalpies= -1049.948829  
Sum of electronic and thermal Free Energies= -1050.028604

HF=-1050.3710451

### Geometry, three lowest frequencies and thermochemistry of 1d

| Center<br>Number | Atomic<br>Number | Atomic<br>Type | Coordinates (Angstroms) |           |           |
|------------------|------------------|----------------|-------------------------|-----------|-----------|
|                  |                  |                | X                       | Y         | Z         |
| 1                | 40               | 0              | -0.922081               | -1.137827 | 0.066493  |
| 2                | 6                | 0              | 1.329895                | -1.139703 | 0.180404  |
| 3                | 6                | 0              | 1.806921                | 0.131934  | -0.010312 |
| 4                | 6                | 0              | 0.863936                | 1.284408  | -0.199041 |
| 5                | 6                | 0              | -0.492057               | 1.061044  | -0.209544 |
| 6                | 6                | 0              | -1.517095               | 2.129692  | -0.233010 |
| 7                | 6                | 0              | -1.554642               | 3.133878  | 0.765703  |
| 8                | 6                | 0              | -2.560548               | 4.104098  | 0.788114  |
| 9                | 6                | 0              | -3.565235               | 4.105775  | -0.187458 |
| 10               | 6                | 0              | -3.549158               | 3.123699  | -1.184877 |
| 11               | 6                | 0              | -2.546589               | 2.148954  | -1.202781 |
| 12               | 6                | 0              | -2.514048               | -2.189400 | 1.848255  |
| 13               | 6                | 0              | -2.669912               | -0.775399 | 1.948850  |
| 14               | 6                | 0              | -1.440911               | -0.230003 | 2.429943  |
| 15               | 6                | 0              | -0.524786               | -1.308532 | 2.621229  |
| 16               | 6                | 0              | -1.187932               | -2.519585 | 2.256540  |
| 17               | 6                | 0              | -0.205347               | -2.096184 | -2.249213 |
| 18               | 6                | 0              | -1.166453               | -1.073746 | -2.511237 |
| 19               | 6                | 0              | -2.428586               | -1.519783 | -2.010333 |
| 20               | 6                | 0              | -2.245037               | -2.817255 | -1.447672 |
| 21               | 6                | 0              | -0.872165               | -3.171973 | -1.590023 |
| 22               | 1                | 0              | -0.781084               | 3.142270  | 1.527734  |
| 23               | 1                | 0              | -2.559848               | 4.860228  | 1.568046  |
| 24               | 1                | 0              | -4.346340               | 4.859207  | -0.170504 |
| 25               | 1                | 0              | -4.317795               | 3.117446  | -1.952569 |
| 26               | 1                | 0              | -2.543707               | 1.400600  | -1.987952 |
| 27               | 1                | 0              | -3.274908               | -2.890225 | 1.537461  |
| 28               | 1                | 0              | -3.565757               | -0.214539 | 1.721825  |
| 29               | 1                | 0              | -1.250953               | 0.812087  | 2.630378  |
| 30               | 1                | 0              | 0.484489                | -1.224950 | 2.992675  |
| 31               | 1                | 0              | -0.767109               | -3.514325 | 2.304615  |
| 32               | 1                | 0              | 0.838328                | -2.067408 | -2.519849 |
| 33               | 1                | 0              | -0.973629               | -0.142971 | -3.020918 |
| 34               | 1                | 0              | -3.364330               | -0.981626 | -2.067749 |
| 35               | 1                | 0              | -3.017320               | -3.432535 | -1.009950 |
| 36               | 1                | 0              | -0.420420               | -4.101705 | -1.273759 |
| 37               | 6                | 0              | 3.287057                | 0.424130  | -0.029583 |
| 38               | 6                | 0              | 3.976463                | 0.744648  | 1.155044  |
| 39               | 6                | 0              | 4.018981                | 0.370210  | -1.230922 |
| 40               | 6                | 0              | 5.351294                | 1.006545  | 1.139977  |
| 41               | 1                | 0              | 3.427605                | 0.785390  | 2.091512  |
| 42               | 6                | 0              | 5.393769                | 0.631582  | -1.249084 |
| 43               | 1                | 0              | 3.503104                | 0.121510  | -2.153962 |
| 44               | 6                | 0              | 6.064617                | 0.952231  | -0.063094 |
| 45               | 1                | 0              | 5.864084                | 1.251082  | 2.065559  |
| 46               | 1                | 0              | 5.939700                | 0.584195  | -2.186711 |
| 47               | 1                | 0              | 7.130950                | 1.155453  | -0.076019 |
| 48               | 6                | 0              | 1.486040                | 2.660688  | -0.381912 |
| 49               | 1                | 0              | 2.041129                | 2.979342  | 0.510577  |
| 50               | 1                | 0              | 2.211952                | 2.653041  | -1.204286 |
| 51               | 1                | 0              | 0.728115                | 3.415075  | -0.599822 |
| 52               | 6                | 0              | 2.221173                | -2.342096 | 0.396183  |
| 53               | 1                | 0              | 2.037463                | -3.114985 | -0.364977 |
| 54               | 1                | 0              | 3.290770                | -2.100508 | 0.371854  |
| 55               | 1                | 0              | 2.010895                | -2.817225 | 1.366223  |

Harmonic frequencies (cm<sup>-1</sup>), IR intensities (KM/Mole), Raman scattering activities (A<sup>4</sup>/AMU), depolarization ratios for plane and unpolarized incident light, reduced masses (AMU), force constants (mDyne/A), and normal coordinates:

|                | 1       | 2       | 3       |
|----------------|---------|---------|---------|
|                | A       | A       | A       |
| Frequencies -- | 20.9000 | 24.2791 | 34.1129 |
| Red. masses -- | 3.7776  | 3.6593  | 4.6868  |
| Frc consts --  | 0.0010  | 0.0013  | 0.0032  |
| IR Inten --    | 0.0163  | 0.0037  | 0.0487  |

HF=-1128.9703575

### Geometry, three lowest frequencies and thermochemistry of 1e

| Center Number | Atomic Number | Atomic Type | Coordinates (Angstroms) |           |           |
|---------------|---------------|-------------|-------------------------|-----------|-----------|
|               |               |             | X                       | Y         | Z         |
| 1             | 40            | 0           | 0.002098                | -0.844994 | 0.075088  |
| 2             | 6             | 0           | 3.754788                | -0.004102 | -0.961290 |
| 3             | 6             | 0           | 5.135315                | -0.067928 | -0.745157 |
| 4             | 6             | 0           | 5.726702                | 0.666633  | 0.289124  |
| 5             | 6             | 0           | 4.919760                | 1.473649  | 1.100547  |
| 6             | 6             | 0           | 3.540993                | 1.543233  | 0.879648  |
| 7             | 6             | 0           | 2.920463                | 0.807001  | -0.159158 |
| 8             | 6             | 0           | 1.447910                | 0.845287  | -0.332055 |
| 9             | 6             | 0           | 0.743260                | 1.979890  | -0.650172 |
| 10            | 6             | 0           | -0.759991               | 1.976113  | -0.642633 |
| 11            | 6             | 0           | -1.456649               | 0.840214  | -0.311735 |
| 12            | 6             | 0           | -2.929191               | 0.798016  | -0.135787 |
| 13            | 6             | 0           | -3.544510               | 1.509200  | 0.923279  |
| 14            | 6             | 0           | -4.923334               | 1.440512  | 1.144429  |
| 15            | 6             | 0           | -5.735245               | 0.659182  | 0.313222  |
| 16            | 6             | 0           | -5.148985               | -0.049701 | -0.741654 |
| 17            | 6             | 0           | -3.768511               | 0.013822  | -0.958805 |
| 18            | 6             | 0           | 0.702480                | -2.209648 | 2.147670  |
| 19            | 6             | 0           | -0.728838               | -2.136173 | 2.175216  |
| 20            | 6             | 0           | -1.093468               | -0.784149 | 2.440126  |
| 21            | 6             | 0           | 0.105767                | -0.021384 | 2.556670  |
| 22            | 6             | 0           | 1.214158                | -0.903575 | 2.391531  |
| 23            | 6             | 0           | 0.701946                | -1.473338 | -2.355103 |
| 24            | 6             | 0           | -0.724603               | -1.455073 | -2.352731 |
| 25            | 6             | 0           | -1.178346               | -2.530859 | -1.530599 |
| 26            | 6             | 0           | -0.032351               | -3.215187 | -1.031317 |
| 27            | 6             | 0           | 1.130051                | -2.559889 | -1.533347 |
| 28            | 1             | 0           | 3.316788                | -0.576853 | -1.770888 |
| 29            | 1             | 0           | 5.750165                | -0.691670 | -1.387791 |
| 30            | 1             | 0           | 6.797229                | 0.612287  | 0.459503  |
| 31            | 1             | 0           | 5.364323                | 2.051625  | 1.905710  |
| 32            | 1             | 0           | 2.923286                | 2.171760  | 1.514337  |
| 33            | 1             | 0           | -2.922792               | 2.119585  | 1.571806  |
| 34            | 1             | 0           | -5.364031               | 1.999625  | 1.964881  |
| 35            | 1             | 0           | -6.805801               | 0.605464  | 0.483592  |
| 36            | 1             | 0           | -5.767841               | -0.652325 | -1.400411 |
| 37            | 1             | 0           | -3.335214               | -0.536902 | -1.786024 |
| 38            | 1             | 0           | 1.289366                | -3.105126 | 2.002055  |
| 39            | 1             | 0           | -1.410184               | -2.966717 | 2.058397  |
| 40            | 1             | 0           | -2.099534               | -0.400327 | 2.519708  |
| 41            | 1             | 0           | 0.164509                | 1.040892  | 2.739339  |
| 42            | 1             | 0           | 2.256230                | -0.621985 | 2.424947  |
| 43            | 1             | 0           | 1.336323                | -0.795793 | -2.903866 |
| 44            | 1             | 0           | -1.343029               | -0.760907 | -2.898861 |
| 45            | 1             | 0           | -2.208772               | -2.788521 | -1.330839 |
| 46            | 1             | 0           | -0.042764               | -4.087578 | -0.394251 |
| 47            | 1             | 0           | 2.153932                | -2.846062 | -1.338554 |
| 48            | 6             | 0           | -1.455105               | 3.278438  | -1.017351 |
| 49            | 1             | 0           | -2.540235               | 3.165345  | -1.003935 |
| 50            | 1             | 0           | -1.192905               | 4.096536  | -0.333212 |
| 51            | 1             | 0           | -1.164358               | 3.606942  | -2.023911 |
| 52            | 6             | 0           | 1.427883                | 3.288904  | -1.020616 |
| 53            | 1             | 0           | 1.174929                | 4.097940  | -0.322147 |
| 54            | 1             | 0           | 2.513407                | 3.179225  | -1.027004 |

55                    1                    0                    1.118929                    3.628759                    -2.017817

-----  
 Harmonic frequencies (cm<sup>-1</sup>), IR intensities (KM/Mole), Raman scattering activities (A<sup>4</sup>/AMU), depolarization ratios for plane and unpolarized incident light, reduced masses (AMU), force constants (mDyne/A), and normal coordinates:

|                | 1       | 2       | 3       |
|----------------|---------|---------|---------|
|                | A       | A       | A       |
| Frequencies -- | 20.1136 | 24.4941 | 35.2801 |
| Red. masses -- | 3.8339  | 3.5997  | 4.7998  |
| Frc consts --  | 0.0009  | 0.0013  | 0.0035  |
| IR Inten --    | 0.0361  | 0.0309  | 0.0024  |

HF=-1128.9741671

### NBO analysis of 1a

Summary of Natural Population Analysis:

| Atom No | Natural Charge | Natural Population |         |         |          |
|---------|----------------|--------------------|---------|---------|----------|
|         |                | Core               | Valence | Rydberg | Total    |
| Zr 1    | 1.65141        | 35.97814           | 2.27740 | 0.09305 | 38.34859 |
| C 2     | -0.63201       | 1.99868            | 4.61760 | 0.01572 | 6.63201  |
| C 3     | -0.06900       | 1.99883            | 4.05613 | 0.01405 | 6.06900  |
| C 4     | -0.24217       | 1.99884            | 4.23251 | 0.01083 | 6.24217  |
| C 5     | -0.40529       | 1.99868            | 4.38545 | 0.02116 | 6.40529  |
| C 6     | -0.06047       | 1.99889            | 4.04746 | 0.01411 | 6.06047  |
| C 7     | -0.23130       | 1.99896            | 4.22189 | 0.01046 | 6.23130  |
| C 8     | -0.23748       | 1.99899            | 4.22699 | 0.01150 | 6.23748  |
| C 9     | -0.24956       | 1.99899            | 4.23914 | 0.01143 | 6.24956  |
| C 10    | -0.24048       | 1.99899            | 4.22996 | 0.01153 | 6.24048  |
| C 11    | -0.22950       | 1.99896            | 4.21985 | 0.01069 | 6.22950  |
| C 12    | -0.34454       | 1.99882            | 4.32860 | 0.01712 | 6.34454  |
| C 13    | -0.37345       | 1.99880            | 4.35806 | 0.01659 | 6.37345  |
| C 14    | -0.34287       | 1.99875            | 4.32790 | 0.01622 | 6.34287  |
| C 15    | -0.31852       | 1.99876            | 4.30331 | 0.01645 | 6.31852  |
| C 16    | -0.34932       | 1.99878            | 4.33440 | 0.01613 | 6.34932  |
| C 17    | -0.33398       | 1.99875            | 4.31909 | 0.01614 | 6.33398  |
| C 18    | -0.32554       | 1.99876            | 4.31013 | 0.01665 | 6.32554  |
| C 19    | -0.34516       | 1.99877            | 4.33017 | 0.01621 | 6.34516  |
| C 20    | -0.34717       | 1.99883            | 4.33139 | 0.01695 | 6.34717  |
| C 21    | -0.37385       | 1.99880            | 4.35831 | 0.01673 | 6.37385  |
| H 22    | 0.22748        | 0.00000            | 0.77013 | 0.00239 | 0.77252  |
| H 23    | 0.24208        | 0.00000            | 0.75652 | 0.00140 | 0.75792  |
| H 24    | 0.24203        | 0.00000            | 0.75684 | 0.00113 | 0.75797  |
| H 25    | 0.24108        | 0.00000            | 0.75789 | 0.00103 | 0.75892  |
| H 26    | 0.24066        | 0.00000            | 0.75826 | 0.00108 | 0.75934  |
| H 27    | 0.23208        | 0.00000            | 0.76642 | 0.00150 | 0.76792  |
| H 28    | 0.27012        | 0.00000            | 0.72895 | 0.00092 | 0.72988  |
| H 29    | 0.27128        | 0.00000            | 0.72784 | 0.00087 | 0.72872  |
| H 30    | 0.28235        | 0.00000            | 0.71665 | 0.00100 | 0.71765  |
| H 31    | 0.28315        | 0.00000            | 0.71587 | 0.00098 | 0.71685  |
| H 32    | 0.27264        | 0.00000            | 0.72650 | 0.00086 | 0.72736  |
| H 33    | 0.28078        | 0.00000            | 0.71826 | 0.00096 | 0.71922  |
| H 34    | 0.28279        | 0.00000            | 0.71616 | 0.00105 | 0.71721  |
| H 35    | 0.27849        | 0.00000            | 0.72050 | 0.00101 | 0.72151  |
| H 36    | 0.26991        | 0.00000            | 0.72918 | 0.00091 | 0.73009  |
| H 37    | 0.27186        | 0.00000            | 0.72720 | 0.00094 | 0.72814  |
| H 38    | 0.22732        | 0.00000            | 0.77146 | 0.00121 | 0.77268  |
| C 39    | -0.04663       | 1.99890            | 4.03491 | 0.01282 | 6.04663  |
| C 40    | -0.23229       | 1.99895            | 4.22319 | 0.01014 | 6.23229  |
| C 41    | -0.22520       | 1.99895            | 4.21590 | 0.01034 | 6.22520  |
| C 42    | -0.23772       | 1.99899            | 4.22718 | 0.01155 | 6.23772  |
| H 43    | 0.24435        | 0.00000            | 0.75439 | 0.00126 | 0.75565  |
| C 44    | -0.23902       | 1.99899            | 4.22857 | 0.01145 | 6.23902  |
| H 45    | 0.24181        | 0.00000            | 0.75678 | 0.00141 | 0.75819  |
| C 46    | -0.24573       | 1.99899            | 4.23544 | 0.01130 | 6.24573  |
| H 47    | 0.24200        | 0.00000            | 0.75692 | 0.00108 | 0.75800  |
| H 48    | 0.24145        | 0.00000            | 0.75747 | 0.00109 | 0.75855  |
| H 49    | 0.24113        | 0.00000            | 0.75783 | 0.00104 | 0.75887  |

```
=====
* Total * 0.00000 87.94857 129.56899 0.48244 218.00000
```

### NBO analysis of 1b

Summary of Natural Population Analysis:

| Atom No   | Natural Charge | Natural Population |           |         |           |
|-----------|----------------|--------------------|-----------|---------|-----------|
|           |                | Core               | Valence   | Rydberg | Total     |
| Zr 1      | 1.62533        | 35.97745           | 2.29605   | 0.10116 | 38.37467  |
| C 2       | -0.22729       | 1.99897            | 4.21780   | 0.01052 | 6.22729   |
| C 3       | -0.24104       | 1.99899            | 4.23049   | 0.01157 | 6.24104   |
| C 4       | -0.24886       | 1.99899            | 4.23842   | 0.01145 | 6.24886   |
| C 5       | -0.23852       | 1.99899            | 4.22805   | 0.01148 | 6.23852   |
| C 6       | -0.22642       | 1.99896            | 4.21710   | 0.01036 | 6.22642   |
| C 7       | -0.06325       | 1.99889            | 4.05037   | 0.01399 | 6.06325   |
| C 8       | -0.40753       | 1.99864            | 4.38821   | 0.02068 | 6.40753   |
| C 9       | -0.25030       | 1.99885            | 4.23948   | 0.01197 | 6.25030   |
| C 10      | -0.25029       | 1.99885            | 4.23947   | 0.01197 | 6.25029   |
| C 11      | -0.40756       | 1.99864            | 4.38824   | 0.02068 | 6.40756   |
| C 12      | -0.06320       | 1.99889            | 4.05032   | 0.01399 | 6.06320   |
| C 13      | -0.22641       | 1.99896            | 4.21709   | 0.01036 | 6.22641   |
| C 14      | -0.23854       | 1.99899            | 4.22806   | 0.01148 | 6.23854   |
| C 15      | -0.24888       | 1.99899            | 4.23843   | 0.01145 | 6.24888   |
| C 16      | -0.24105       | 1.99899            | 4.23050   | 0.01157 | 6.24105   |
| C 17      | -0.22726       | 1.99897            | 4.21777   | 0.01052 | 6.22726   |
| C 18      | -0.34699       | 1.99880            | 4.33113   | 0.01705 | 6.34699   |
| C 19      | -0.37512       | 1.99879            | 4.35960   | 0.01673 | 6.37512   |
| C 20      | -0.33739       | 1.99874            | 4.32253   | 0.01612 | 6.33739   |
| C 21      | -0.32233       | 1.99874            | 4.30688   | 0.01672 | 6.32233   |
| C 22      | -0.33879       | 1.99876            | 4.32377   | 0.01626 | 6.33879   |
| C 23      | -0.33741       | 1.99874            | 4.32255   | 0.01612 | 6.33741   |
| C 24      | -0.32245       | 1.99874            | 4.30700   | 0.01671 | 6.32245   |
| C 25      | -0.33896       | 1.99876            | 4.32393   | 0.01627 | 6.33896   |
| C 26      | -0.34692       | 1.99880            | 4.33107   | 0.01705 | 6.34692   |
| C 27      | -0.37495       | 1.99879            | 4.35944   | 0.01672 | 6.37495   |
| H 28      | 0.23210        | 0.00000            | 0.76639   | 0.00151 | 0.76790   |
| H 29      | 0.24102        | 0.00000            | 0.75791   | 0.00108 | 0.75898   |
| H 30      | 0.24146        | 0.00000            | 0.75751   | 0.00103 | 0.75854   |
| H 31      | 0.24212        | 0.00000            | 0.75675   | 0.00113 | 0.75788   |
| H 32      | 0.24001        | 0.00000            | 0.75857   | 0.00141 | 0.75999   |
| H 33      | 0.22819        | 0.00000            | 0.76944   | 0.00237 | 0.77181   |
| H 34      | 0.22820        | 0.00000            | 0.76943   | 0.00237 | 0.77180   |
| H 35      | 0.24000        | 0.00000            | 0.75858   | 0.00141 | 0.76000   |
| H 36      | 0.24212        | 0.00000            | 0.75675   | 0.00113 | 0.75788   |
| H 37      | 0.24146        | 0.00000            | 0.75751   | 0.00103 | 0.75854   |
| H 38      | 0.24101        | 0.00000            | 0.75791   | 0.00108 | 0.75899   |
| H 39      | 0.23209        | 0.00000            | 0.76639   | 0.00151 | 0.76791   |
| H 40      | 0.27062        | 0.00000            | 0.72846   | 0.00093 | 0.72938   |
| H 41      | 0.27110        | 0.00000            | 0.72795   | 0.00095 | 0.72890   |
| H 42      | 0.28292        | 0.00000            | 0.71606   | 0.00102 | 0.71708   |
| H 43      | 0.28252        | 0.00000            | 0.71644   | 0.00104 | 0.71748   |
| H 44      | 0.27916        | 0.00000            | 0.71976   | 0.00108 | 0.72084   |
| H 45      | 0.28293        | 0.00000            | 0.71605   | 0.00102 | 0.71707   |
| H 46      | 0.28253        | 0.00000            | 0.71644   | 0.00104 | 0.71747   |
| H 47      | 0.27913        | 0.00000            | 0.71978   | 0.00108 | 0.72087   |
| H 48      | 0.27061        | 0.00000            | 0.72847   | 0.00093 | 0.72939   |
| H 49      | 0.27107        | 0.00000            | 0.72798   | 0.00095 | 0.72893   |
| =====     |                |                    |           |         |           |
| * Total * | 0.00000        | 87.94766           | 129.55426 | 0.49808 | 218.00000 |

### NBO analysis of 1d

| Atom No | Natural Charge | Natural Population |         |         |          |
|---------|----------------|--------------------|---------|---------|----------|
|         |                | Core               | Valence | Rydberg | Total    |
| Zr 1    | 1.68663        | 35.97695           | 2.23732 | 0.09910 | 38.31337 |
| C 2     | -0.37831       | 1.99862            | 4.36050 | 0.01919 | 6.37831  |
| C 3     | -0.07962       | 1.99871            | 4.06516 | 0.01574 | 6.07962  |
| C 4     | -0.00424       | 1.99874            | 3.99285 | 0.01265 | 6.00424  |

|           |          |          |           |         |           |
|-----------|----------|----------|-----------|---------|-----------|
| C 5       | -0.43883 | 1.99860  | 4.42097   | 0.01926 | 6.43883   |
| C 6       | -0.05210 | 1.99888  | 4.03891   | 0.01430 | 6.05210   |
| C 7       | -0.24530 | 1.99894  | 4.23536   | 0.01100 | 6.24530   |
| C 8       | -0.23727 | 1.99898  | 4.22673   | 0.01156 | 6.23727   |
| C 9       | -0.25623 | 1.99899  | 4.24573   | 0.01151 | 6.25623   |
| C 10      | -0.23891 | 1.99899  | 4.22848   | 0.01145 | 6.23891   |
| C 11      | -0.23472 | 1.99894  | 4.22466   | 0.01113 | 6.23472   |
| C 12      | -0.34410 | 1.99883  | 4.32854   | 0.01674 | 6.34410   |
| C 13      | -0.36014 | 1.99877  | 4.34475   | 0.01661 | 6.36014   |
| C 14      | -0.33208 | 1.99874  | 4.31673   | 0.01660 | 6.33208   |
| C 15      | -0.33248 | 1.99874  | 4.31737   | 0.01636 | 6.33248   |
| C 16      | -0.36392 | 1.99878  | 4.34877   | 0.01636 | 6.36392   |
| C 17      | -0.32541 | 1.99875  | 4.31021   | 0.01646 | 6.32541   |
| C 18      | -0.34371 | 1.99874  | 4.32887   | 0.01610 | 6.34371   |
| C 19      | -0.26974 | 1.99878  | 4.35083   | 0.01613 | 6.36574   |
| C 20      | -0.34185 | 1.99882  | 4.32619   | 0.01683 | 6.34185   |
| C 21      | -0.36052 | 1.99878  | 4.34548   | 0.01626 | 6.36052   |
| H 22      | 0.24201  | 0.00000  | 0.75682   | 0.00117 | 0.75799   |
| H 23      | 0.24144  | 0.00000  | 0.75742   | 0.00113 | 0.75856   |
| H 24      | 0.24050  | 0.00000  | 0.75847   | 0.00104 | 0.75950   |
| H 25      | 0.24014  | 0.00000  | 0.75876   | 0.00110 | 0.75986   |
| H 26      | 0.23304  | 0.00000  | 0.76554   | 0.00142 | 0.76696   |
| H 27      | 0.26921  | 0.00000  | 0.72993   | 0.00086 | 0.73079   |
| H 28      | 0.27703  | 0.00000  | 0.72201   | 0.00096 | 0.72297   |
| H 29      | 0.28055  | 0.00000  | 0.71827   | 0.00117 | 0.71945   |
| H 30      | 0.27899  | 0.00000  | 0.72009   | 0.00092 | 0.72101   |
| H 31      | 0.27126  | 0.00000  | 0.72786   | 0.00088 | 0.72874   |
| H 32      | 0.27913  | 0.00000  | 0.71993   | 0.00093 | 0.72087   |
| H 33      | 0.28029  | 0.00000  | 0.71874   | 0.00097 | 0.71971   |
| H 34      | 0.27263  | 0.00000  | 0.72643   | 0.00094 | 0.72737   |
| H 35      | 0.26933  | 0.00000  | 0.72982   | 0.00085 | 0.73067   |
| H 36      | 0.27099  | 0.00000  | 0.72816   | 0.00085 | 0.72901   |
| C 37      | -0.04934 | 1.99890  | 4.03476   | 0.01568 | 6.04934   |
| C 38      | -0.23065 | 1.99890  | 4.22120   | 0.01055 | 6.23065   |
| C 39      | -0.23173 | 1.99890  | 4.22229   | 0.01055 | 6.23173   |
| C 40      | -0.23851 | 1.99899  | 4.22795   | 0.01157 | 6.23851   |
| H 41      | 0.24333  | 0.00000  | 0.75542   | 0.00126 | 0.75667   |
| C 42      | -0.23847 | 1.99899  | 4.22790   | 0.01158 | 6.23847   |
| H 43      | 0.24352  | 0.00000  | 0.75523   | 0.00125 | 0.75648   |
| C 44      | -0.24874 | 1.99899  | 4.23847   | 0.01128 | 6.24874   |
| H 45      | 0.24189  | 0.00000  | 0.75700   | 0.00111 | 0.75811   |
| H 46      | 0.24203  | 0.00000  | 0.75686   | 0.00111 | 0.75797   |
| H 47      | 0.24156  | 0.00000  | 0.75739   | 0.00105 | 0.75844   |
| C 48      | -0.72185 | 1.99923  | 4.71804   | 0.00459 | 6.72185   |
| H 49      | 0.24656  | 0.00000  | 0.75198   | 0.00147 | 0.75344   |
| H 50      | 0.25072  | 0.00000  | 0.74787   | 0.00141 | 0.74928   |
| H 51      | 0.25168  | 0.00000  | 0.74718   | 0.00114 | 0.74832   |
| C 52      | -0.72156 | 1.99923  | 4.71704   | 0.00530 | 6.72156   |
| H 53      | 0.23634  | 0.00000  | 0.76210   | 0.00156 | 0.76366   |
| H 54      | 0.24800  | 0.00000  | 0.75008   | 0.00192 | 0.75200   |
| H 55      | 0.23752  | 0.00000  | 0.76083   | 0.00165 | 0.76248   |
| =====     |          |          |           |         |           |
| * Total * | 0.00000  | 91.94522 | 141.54223 | 0.51255 | 234.00000 |

### NBO analysis of 1e

| Atom No | Natural Charge | Natural Population |         |         |          |
|---------|----------------|--------------------|---------|---------|----------|
|         |                | Core               | Valence | Rydberg | Total    |
| Zr 1    | 1.68547        | 35.97707           | 2.23933 | 0.09813 | 38.31453 |
| C 2     | -0.23528       | 1.99893            | 4.22548 | 0.01086 | 6.23528  |
| C 3     | -0.23800       | 1.99899            | 4.22755 | 0.01146 | 6.23800  |
| C 4     | -0.25648       | 1.99899            | 4.24598 | 0.01151 | 6.25648  |
| C 5     | -0.23824       | 1.99898            | 4.22769 | 0.01157 | 6.23824  |
| C 6     | -0.24725       | 1.99893            | 4.23717 | 0.01115 | 6.24725  |
| C 7     | -0.05543       | 1.99889            | 4.04204 | 0.01450 | 6.05543  |
| C 8     | -0.42279       | 1.99859            | 4.40484 | 0.01937 | 6.42279  |
| C 9     | -0.01911       | 1.99875            | 4.00777 | 0.01260 | 6.01911  |
| C 10    | -0.01904       | 1.99875            | 4.00768 | 0.01262 | 6.01904  |

|           |          |          |           |         |           |
|-----------|----------|----------|-----------|---------|-----------|
| C 11      | -0.42331 | 1.99859  | 4.40539   | 0.01933 | 6.42331   |
| C 12      | -0.05487 | 1.99889  | 4.04145   | 0.01453 | 6.05487   |
| C 13      | -0.24885 | 1.99893  | 4.23873   | 0.01119 | 6.24885   |
| C 14      | -0.23755 | 1.99898  | 4.22700   | 0.01157 | 6.23755   |
| C 15      | -0.25643 | 1.99899  | 4.24593   | 0.01151 | 6.25643   |
| C 16      | -0.23772 | 1.99899  | 4.22726   | 0.01147 | 6.23772   |
| C 17      | -0.23604 | 1.99893  | 4.22626   | 0.01085 | 6.23604   |
| C 18      | -0.36686 | 1.99881  | 4.35104   | 0.01701 | 6.36686   |
| C 19      | -0.37245 | 1.99880  | 4.35654   | 0.01710 | 6.37245   |
| C 20      | -0.33191 | 1.99875  | 4.31708   | 0.01608 | 6.33191   |
| C 21      | -0.32468 | 1.99875  | 4.30933   | 0.01660 | 6.32468   |
| C 22      | -0.33201 | 1.99875  | 4.31726   | 0.01600 | 6.33201   |
| C 23      | -0.33446 | 1.99875  | 4.31960   | 0.01611 | 6.33446   |
| C 24      | -0.33341 | 1.99875  | 4.31856   | 0.01609 | 6.33341   |
| C 25      | -0.36046 | 1.99878  | 4.34561   | 0.01607 | 6.36046   |
| C 26      | -0.34354 | 1.99881  | 4.32748   | 0.01725 | 6.34354   |
| C 27      | -0.36192 | 1.99878  | 4.34700   | 0.01614 | 6.36192   |
| H 28      | 0.23361  | 0.00000  | 0.76499   | 0.00140 | 0.76639   |
| H 29      | 0.24098  | 0.00000  | 0.75793   | 0.00109 | 0.75902   |
| H 30      | 0.24114  | 0.00000  | 0.75782   | 0.00103 | 0.75886   |
| H 31      | 0.24213  | 0.00000  | 0.75674   | 0.00113 | 0.75787   |
| H 32      | 0.24386  | 0.00000  | 0.75492   | 0.00122 | 0.75614   |
| H 33      | 0.24418  | 0.00000  | 0.75459   | 0.00123 | 0.75582   |
| H 34      | 0.24207  | 0.00000  | 0.75680   | 0.00113 | 0.75793   |
| H 35      | 0.24111  | 0.00000  | 0.75786   | 0.00103 | 0.75889   |
| H 36      | 0.24099  | 0.00000  | 0.75792   | 0.00109 | 0.75901   |
| H 37      | 0.23362  | 0.00000  | 0.76498   | 0.00141 | 0.76638   |
| H 38      | 0.27154  | 0.00000  | 0.72745   | 0.00101 | 0.72846   |
| H 39      | 0.27222  | 0.00000  | 0.72675   | 0.00103 | 0.72778   |
| H 40      | 0.28149  | 0.00000  | 0.71731   | 0.00120 | 0.71851   |
| H 41      | 0.27698  | 0.00000  | 0.72200   | 0.00102 | 0.72302   |
| H 42      | 0.28173  | 0.00000  | 0.71715   | 0.00112 | 0.71827   |
| H 43      | 0.27785  | 0.00000  | 0.72120   | 0.00095 | 0.72215   |
| H 44      | 0.27778  | 0.00000  | 0.72127   | 0.00095 | 0.72222   |
| H 45      | 0.27394  | 0.00000  | 0.72501   | 0.00104 | 0.72606   |
| H 46      | 0.27056  | 0.00000  | 0.72850   | 0.00093 | 0.72944   |
| H 47      | 0.27362  | 0.00000  | 0.72535   | 0.00102 | 0.72638   |
| C 48      | -0.71937 | 1.99924  | 4.71518   | 0.00495 | 6.71937   |
| H 49      | 0.25493  | 0.00000  | 0.74397   | 0.00110 | 0.74507   |
| H 50      | 0.24169  | 0.00000  | 0.75699   | 0.00132 | 0.75831   |
| H 51      | 0.24342  | 0.00000  | 0.75529   | 0.00129 | 0.75658   |
| C 52      | -0.71956 | 1.99924  | 4.71537   | 0.00495 | 6.71956   |
| H 53      | 0.24147  | 0.00000  | 0.75720   | 0.00133 | 0.75853   |
| H 54      | 0.25494  | 0.00000  | 0.74396   | 0.00110 | 0.74506   |
| H 55      | 0.24367  | 0.00000  | 0.75505   | 0.00129 | 0.75633   |
| =====     |          |          |           |         |           |
| * Total * | 0.00000  | 91.94537 | 141.54658 | 0.50805 | 234.00000 |

### Geometry, three lowest frequencies and thermochemistry of **1b** (tetramer)

| Center Number | Atomic Number | Atomic Type | Coordinates (Angstroms) |           |           |
|---------------|---------------|-------------|-------------------------|-----------|-----------|
|               |               |             | X                       | Y         | Z         |
| 1             | 6             | 0           | 5.550742                | -3.130631 | -2.379764 |
| 2             | 6             | 0           | 5.238097                | -3.222696 | -0.985279 |
| 3             | 6             | 0           | 3.819602                | -3.090684 | -0.836226 |
| 4             | 6             | 0           | 3.248562                | -2.927652 | -2.145973 |
| 5             | 6             | 0           | 4.321308                | -2.949619 | -3.097755 |
| 6             | 40            | 0           | 4.609378                | -0.782765 | -1.729913 |
| 7             | 6             | 0           | 6.829384                | 0.552775  | -1.575483 |
| 8             | 6             | 0           | 6.830700                | -0.102397 | -2.849684 |
| 9             | 6             | 0           | 5.770522                | 0.460125  | -3.640751 |
| 10            | 6             | 0           | 5.120760                | 1.471051  | -2.856331 |
| 11            | 6             | 0           | 5.772852                | 1.522522  | -1.578305 |
| 12            | 6             | 0           | 4.163154                | -0.146631 | 0.394913  |
| 13            | 6             | 0           | 2.883190                | 0.382266  | 0.332809  |
| 14            | 6             | 0           | 2.099535                | 0.460745  | -0.897211 |
| 15            | 6             | 0           | 2.550993                | 0.040574  | -2.136703 |
| 16            | 6             | 0           | 1.765723                | 0.186345  | -3.367958 |
| 17            | 6             | 0           | 0.535078                | 0.907795  | -3.441897 |
| 18            | 6             | 0           | -0.154708               | 1.049226  | -4.655536 |
| 19            | 6             | 0           | 0.350966                | 0.464484  | -5.835563 |

|    |    |   |           |           |           |
|----|----|---|-----------|-----------|-----------|
| 20 | 6  | 0 | 1.558200  | -0.260204 | -5.787500 |
| 21 | 6  | 0 | 2.254400  | -0.388397 | -4.574633 |
| 22 | 6  | 0 | 4.959450  | -0.174575 | 1.627048  |
| 23 | 6  | 0 | 6.159388  | -0.938221 | 1.660992  |
| 24 | 6  | 0 | 6.947813  | -1.022684 | 2.820042  |
| 25 | 6  | 0 | 6.564541  | -0.329414 | 3.984676  |
| 26 | 6  | 0 | 5.390906  | 0.454399  | 3.968533  |
| 27 | 6  | 0 | 4.601243  | 0.535341  | 2.812130  |
| 28 | 6  | 0 | 3.118623  | 3.763508  | -0.631981 |
| 29 | 6  | 0 | 3.406252  | 5.154207  | -0.424398 |
| 30 | 6  | 0 | 2.829280  | 5.896162  | -1.509791 |
| 31 | 6  | 0 | 2.187385  | 4.966380  | -2.389108 |
| 32 | 6  | 0 | 2.360224  | 3.651266  | -1.847242 |
| 33 | 40 | 0 | 0.862944  | 4.879035  | -0.137753 |
| 34 | 6  | 0 | -1.225192 | 6.401223  | -0.017445 |
| 35 | 6  | 0 | -0.084650 | 7.227846  | -0.282533 |
| 36 | 6  | 0 | 0.759094  | 7.208038  | 0.887461  |
| 37 | 6  | 0 | 0.138499  | 6.365788  | 1.864687  |
| 38 | 6  | 0 | -1.075789 | 5.854994  | 1.299068  |
| 39 | 6  | 0 | -0.679761 | 3.536961  | -1.077678 |
| 40 | 6  | 0 | -0.738374 | 2.478613  | -0.185202 |
| 41 | 6  | 0 | 0.035162  | 2.372959  | 1.052129  |
| 42 | 6  | 0 | 0.933213  | 3.326898  | 1.498058  |
| 43 | 6  | 0 | 1.666153  | 3.206484  | 2.761738  |
| 44 | 6  | 0 | 1.326595  | 2.263770  | 3.777528  |
| 45 | 6  | 0 | 2.067885  | 2.182724  | 4.965484  |
| 46 | 6  | 0 | 3.166263  | 3.041002  | 5.185070  |
| 47 | 6  | 0 | 3.514010  | 3.985692  | 4.199460  |
| 48 | 6  | 0 | 2.769484  | 4.069075  | 3.011577  |
| 49 | 6  | 0 | -1.524867 | 3.620860  | -2.274253 |
| 50 | 6  | 0 | -1.354608 | 4.711859  | -3.171338 |
| 51 | 6  | 0 | -2.146258 | 4.846755  | -4.323938 |
| 52 | 6  | 0 | -3.148464 | 3.897940  | -4.609287 |
| 53 | 6  | 0 | -3.346503 | 2.811814  | -3.730129 |
| 54 | 6  | 0 | -2.545056 | 2.672169  | -2.587201 |
| 55 | 6  | 0 | -3.819599 | 3.090691  | 0.836235  |
| 56 | 6  | 0 | -5.238083 | 3.222731  | 0.985390  |
| 57 | 6  | 0 | -5.550633 | 3.130652  | 2.379896  |
| 58 | 6  | 0 | -4.321155 | 2.949600  | 3.097798  |
| 59 | 6  | 0 | -3.248475 | 2.927620  | 2.145942  |
| 60 | 40 | 0 | -4.609362 | 0.782777  | 1.729922  |
| 61 | 6  | 0 | -6.829374 | -0.552752 | 1.575379  |
| 62 | 6  | 0 | -6.830752 | 0.102431  | 2.849574  |
| 63 | 6  | 0 | -5.770617 | -0.460092 | 3.640701  |
| 64 | 6  | 0 | -5.120823 | -1.471031 | 2.856323  |
| 65 | 6  | 0 | -5.772848 | -1.522505 | 1.578264  |
| 66 | 6  | 0 | -4.163127 | 0.146675  | -0.394913 |
| 67 | 6  | 0 | -2.883176 | -0.382252 | -0.332808 |
| 68 | 6  | 0 | -2.099533 | -0.460772 | 0.897215  |
| 69 | 6  | 0 | -2.550996 | -0.040616 | 2.136710  |
| 70 | 6  | 0 | -1.765735 | -0.186414 | 3.367969  |
| 71 | 6  | 0 | -0.535058 | -0.907810 | 3.441888  |
| 72 | 6  | 0 | 0.154724  | -1.049263 | 4.655525  |
| 73 | 6  | 0 | -0.350988 | -0.464600 | 5.835575  |
| 74 | 6  | 0 | -1.558258 | 0.260032  | 5.787534  |
| 75 | 6  | 0 | -2.254452 | 0.388249  | 4.574666  |
| 76 | 6  | 0 | -4.959418 | 0.174637  | -1.627050 |
| 77 | 6  | 0 | -6.159321 | 0.938336  | -1.661012 |
| 78 | 6  | 0 | -6.947746 | 1.022802  | -2.820061 |
| 79 | 6  | 0 | -6.564508 | 0.329484  | -3.984678 |
| 80 | 6  | 0 | -5.390903 | -0.454376 | -3.968519 |
| 81 | 6  | 0 | -4.601241 | -0.535321 | -2.812116 |
| 82 | 6  | 0 | -3.118626 | -3.763481 | 0.631990  |
| 83 | 6  | 0 | -3.406280 | -5.154171 | 0.424384  |
| 84 | 6  | 0 | -2.829327 | -5.896154 | 1.509768  |
| 85 | 6  | 0 | -2.187419 | -4.966397 | 2.389102  |
| 86 | 6  | 0 | -2.360232 | -3.651271 | 1.847257  |
| 87 | 40 | 0 | -0.862959 | -4.879034 | 0.137764  |
| 88 | 6  | 0 | 1.225194  | -6.401193 | 0.017440  |
| 89 | 6  | 0 | 0.084672  | -7.227827 | 0.282582  |
| 90 | 6  | 0 | -0.759103 | -7.208066 | -0.887390 |
| 91 | 6  | 0 | -0.138549 | -6.365834 | -1.864656 |
| 92 | 6  | 0 | 1.075745  | -5.855003 | -1.299084 |
| 93 | 6  | 0 | 0.679757  | -3.536957 | 1.077667  |
| 94 | 6  | 0 | 0.738377  | -2.478626 | 0.185171  |

|     |   |   |           |           |           |
|-----|---|---|-----------|-----------|-----------|
| 95  | 6 | 0 | -0.035156 | -2.372985 | -1.052163 |
| 96  | 6 | 0 | -0.933219 | -3.326922 | -1.498075 |
| 97  | 6 | 0 | -1.666167 | -3.206517 | -2.761751 |
| 98  | 6 | 0 | -1.326644 | -2.263784 | -3.777536 |
| 99  | 6 | 0 | -2.067947 | -2.182745 | -4.965484 |
| 100 | 6 | 0 | -3.166305 | -3.041049 | -5.185069 |
| 101 | 6 | 0 | -3.514018 | -3.985758 | -4.199466 |
| 102 | 6 | 0 | -2.769478 | -4.069135 | -3.011591 |
| 103 | 6 | 0 | 1.524869  | -3.620839 | 2.274239  |
| 104 | 6 | 0 | 1.354589  | -4.711802 | 3.171362  |
| 105 | 6 | 0 | 2.146247  | -4.846679 | 4.323960  |
| 106 | 6 | 0 | 3.148483  | -3.897883 | 4.609266  |
| 107 | 6 | 0 | 3.346544  | -2.811794 | 3.730068  |
| 108 | 6 | 0 | 2.545087  | -2.672167 | 2.587144  |
| 109 | 1 | 0 | -6.456513 | 1.472303  | -0.758381 |
| 110 | 1 | 0 | -7.857682 | 1.625280  | -2.816431 |
| 111 | 1 | 0 | -7.174808 | 0.389018  | -4.886793 |
| 112 | 1 | 0 | -5.088531 | -1.011744 | -4.855004 |
| 113 | 1 | 0 | -3.709578 | -1.159725 | -2.828364 |
| 114 | 1 | 0 | -2.384661 | -0.780008 | -1.225559 |
| 115 | 1 | 0 | -1.099704 | -0.888136 | 0.778905  |
| 116 | 1 | 0 | -0.122006 | -1.375884 | 2.550470  |
| 117 | 1 | 0 | 1.084255  | -1.617061 | 4.674806  |
| 118 | 1 | 0 | 0.184707  | -0.579964 | 6.778791  |
| 119 | 1 | 0 | -1.957950 | 0.717260  | 6.694259  |
| 120 | 1 | 0 | -3.196007 | 0.935584  | 4.540351  |
| 121 | 1 | 0 | -7.512866 | 0.885243  | 3.163736  |
| 122 | 1 | 0 | -5.513657 | -0.181305 | 4.657454  |
| 123 | 1 | 0 | -4.287099 | -2.087178 | 3.167920  |
| 124 | 1 | 0 | -5.507887 | -2.177098 | 0.758123  |
| 125 | 1 | 0 | -7.485903 | -0.336917 | 0.738698  |
| 126 | 1 | 0 | -5.946524 | 3.374311  | 0.178578  |
| 127 | 1 | 0 | -3.271201 | 3.131445  | -0.094985 |
| 128 | 1 | 0 | -2.195458 | 2.806311  | 2.366625  |
| 129 | 1 | 0 | -4.221422 | 2.864739  | 4.174835  |
| 130 | 1 | 0 | -6.540428 | 3.199553  | 2.818624  |
| 131 | 1 | 0 | 0.587095  | -5.452506 | 2.942581  |
| 132 | 1 | 0 | 1.987379  | -5.691976 | 4.995805  |
| 133 | 1 | 0 | 3.770427  | -4.005366 | 5.498858  |
| 134 | 1 | 0 | 4.120873  | -2.071029 | 3.929301  |
| 135 | 1 | 0 | 2.718232  | -1.820685 | 1.932634  |
| 136 | 1 | 0 | 1.407042  | -1.632381 | 0.364932  |
| 137 | 1 | 0 | 0.145133  | -1.453346 | -1.622088 |
| 138 | 1 | 0 | -0.475605 | -1.599640 | -3.641879 |
| 139 | 1 | 0 | -1.780649 | -1.449081 | -5.718670 |
| 140 | 1 | 0 | -3.735840 | -2.980012 | -6.113458 |
| 141 | 1 | 0 | -4.361012 | -4.655006 | -4.358660 |
| 142 | 1 | 0 | -3.031466 | -4.802622 | -2.249471 |
| 143 | 1 | 0 | -0.103695 | -7.787627 | 1.193112  |
| 144 | 1 | 0 | -1.694914 | -7.744761 | -1.005289 |
| 145 | 1 | 0 | -0.540662 | -6.111769 | -2.839196 |
| 146 | 1 | 0 | 1.754842  | -5.155143 | -1.771857 |
| 147 | 1 | 0 | 2.035020  | -6.187989 | 0.705398  |
| 148 | 1 | 0 | -3.410198 | -2.939521 | -0.006692 |
| 149 | 1 | 0 | -3.973798 | -5.574970 | -0.399235 |
| 150 | 1 | 0 | -2.873797 | -6.973063 | 1.637673  |
| 151 | 1 | 0 | -1.650579 | -5.206311 | 3.300275  |
| 152 | 1 | 0 | -1.988312 | -2.733053 | 2.279298  |
| 153 | 1 | 0 | -0.587136 | 5.452576  | -2.942522 |
| 154 | 1 | 0 | -1.987407 | 5.692080  | -4.995752 |
| 155 | 1 | 0 | -3.770402 | 4.005436  | -5.498882 |
| 156 | 1 | 0 | -4.120808 | 2.071035  | -3.929403 |
| 157 | 1 | 0 | -2.718183 | 1.820659  | -1.932725 |
| 158 | 1 | 0 | -1.407029 | 1.632364  | -0.364983 |
| 159 | 1 | 0 | -0.145119 | 1.453310  | 1.622041  |
| 160 | 1 | 0 | 0.475540  | 1.599648  | 3.641868  |
| 161 | 1 | 0 | 1.780562  | 1.449074  | 5.718675  |
| 162 | 1 | 0 | 3.735787  | 2.979961  | 6.113466  |
| 163 | 1 | 0 | 4.361021  | 4.654918  | 4.358655  |
| 164 | 1 | 0 | 3.031498  | 4.802545  | 2.249450  |
| 165 | 1 | 0 | 0.103750  | 7.787669  | -1.193042 |
| 166 | 1 | 0 | 1.694910  | 7.744714  | 1.005399  |
| 167 | 1 | 0 | 0.540581  | 6.111693  | 2.839232  |
| 168 | 1 | 0 | -1.754913 | 5.155135  | 1.771802  |
| 169 | 1 | 0 | -2.035002 | 6.188049  | -0.705432 |



|     |   |   |           |           |           |
|-----|---|---|-----------|-----------|-----------|
| 170 | 1 | 0 | 3.410215  | 2.939562  | 0.006710  |
| 171 | 1 | 0 | 3.973764  | 5.575030  | 0.399212  |
| 172 | 1 | 0 | 2.873731  | 6.973070  | -1.637713 |
| 173 | 1 | 0 | 1.650533  | 5.206270  | -3.300280 |
| 174 | 1 | 0 | 1.988316  | 2.733035  | -2.279265 |
| 175 | 1 | 0 | 6.456609  | -1.472148 | 0.758346  |
| 176 | 1 | 0 | 7.857775  | -1.625122 | 2.816398  |
| 177 | 1 | 0 | 7.174839  | -0.388950 | 4.886792  |
| 178 | 1 | 0 | 5.088508  | 1.011732  | 4.855030  |
| 179 | 1 | 0 | 3.709557  | 1.159711  | 2.828392  |
| 180 | 1 | 0 | 2.384671  | 0.780018  | 1.225559  |
| 181 | 1 | 0 | 1.099695  | 0.888085  | -0.778900 |
| 182 | 1 | 0 | 0.122055  | 1.375929  | -2.550498 |
| 183 | 1 | 0 | -1.084208 | 1.617072  | -4.674837 |
| 184 | 1 | 0 | -0.184732 | 0.579832  | -6.778780 |
| 185 | 1 | 0 | 1.957861  | -0.717494 | -6.694207 |
| 186 | 1 | 0 | 3.195932  | -0.935771 | -4.540304 |
| 187 | 1 | 0 | 7.512802  | -0.885203 | -3.163888 |
| 188 | 1 | 0 | 5.513506  | 0.181342  | -4.657491 |
| 189 | 1 | 0 | 4.287013  | 2.087193  | -3.167878 |
| 190 | 1 | 0 | 5.507929  | 2.177109  | -0.758147 |
| 191 | 1 | 0 | 7.485960  | 0.336940  | -0.738839 |
| 192 | 1 | 0 | 5.946484  | -3.374240 | -0.178412 |
| 193 | 1 | 0 | 3.271137  | -3.131434 | 0.094954  |
| 194 | 1 | 0 | 2.195557  | -2.806365 | -2.366727 |
| 195 | 1 | 0 | 4.221652  | -2.864783 | -4.174801 |
| 196 | 1 | 0 | 6.540569  | -3.199517 | -2.818422 |

-----  
Harmonic frequencies (cm<sup>-1</sup>), IR intensities (KM/Mole), Raman scattering activities (A<sup>4</sup>/AMU), depolarization ratios for plane and unpolarized incident light, reduced masses (AMU), force constants (mDyne/A), and normal coordinates:

|                | 1      | 2       | 3       |
|----------------|--------|---------|---------|
|                | A      | A       | A       |
| Frequencies -- | 2.8891 | 13.2848 | 16.1131 |
| Red. masses -- | 5.6773 | 4.9788  | 4.7489  |
| Frc consts --  | 0.0000 | 0.0005  | 0.0007  |
| IR Inten --    | 0.0439 | 0.0000  | 0.0000  |

Sum of electronic and zero-point Energies= -4197.510818  
Sum of electronic and thermal Energies= -4197.409820  
Sum of electronic and thermal Enthalpies= -4197.408876  
Sum of electronic and thermal Free Energies= -4197.658097

HF=-4199.0707572

#### IV. References for Gaussian

M. J. Frisch, G. W. Trucks, H. B. Schlegel, G. E. Scuseria, M. A. Robb, J. R. Cheeseman, J. A. Montgomery Jr., T. Vreven, K. N. Kudin, J.C. Burant, J. M. Millam, S. S. Iyengar, J. Tomasi, V. Barone, B. Mennucci, M. Cossi, G. Scalmani, N. Rega, G. A. Petersson, H. Nakatsuji, M. Hada, M. Ehara, K. Toyota, R. Fukuda, J. Hasegawa, M. Ishida, T. Nakajima, Y. Honda, O. Kitao, H. Nakai, M. Klene, X. Li, J. E. Knox, H. P. Hratchian, J. B. Cross, V. Bakken, C. Adamo, J. Jaramillo, R. Gomperts, R. E. Stratmann, O. Yazyev, A. J. Austin, R. Cammi, C. Pomelli, J. W. Ochterski, P. Y. Ayala, K. Morokuma, G. A. Voth, P. Salvador, J. J. Dannenberg, V. G. Zakrzewski, S. Dapprich, A. D. Daniels, M. C. Strain, O. Farkas, D. K. Malick, A. D. Rabuck, K. Raghavachari, J. B. Foresman, J. V. Ortiz, Q. Cui, A. G. Baboul, S. Clifford, J. Cioslowski, B. B. Stefanov, G. Liu, A. Liashenko, P. Piskorz, I. Komaromi, R. L. Martin, D. J. Fox, T. Keith, M. A. Al-Laham, C. Y. Peng, A. Nanayakkara, M. Challacombe, P. M. W. Gill, B. Johnson, W. Chen, M. W. Wong, C. Gonzalez, and J. A. Pople, *Gaussian 03, Revision C.02*, 2004.

M. J. Frisch, G. W. Trucks, H. B. Schlegel, G. E. Scuseria, M. A. Robb, J. R. Cheeseman, G. Scalmani, V. Barone, B. Mennucci, G. A. Petersson, H. Nakatsuji, M. Caricato, X. Li, H. P. Hratchian, A. F. Izmaylov, J. Bloino, G. Zheng, J. L. Sonnenberg, M. Hada, M. Ehara, K. Toyota, R. Fukuda, J. Hasegawa, M. Ishida, T. Nakajima, Y. Honda, O. Kitao, H. Nakai, T. Vreven, J. A. Montgomery, Jr., J. E. Peralta, F. Ogliaro, M. Bearpark, J. J. Heyd, E. Brothers, K. N. Kudin, V. N. Staroverov, R. Kobayashi, J. Normand, K. Raghavachari, A. Rendell, J. C. Burant, S. S. Iyengar, J. Tomasi, M. Cossi, N. Rega, N. J. Millam, M. Klene, J. E. Knox, J. B. Cross, V. Bakken, C. Adamo, J. Jaramillo, R. Gomperts, R. E. Stratmann, O. Yazyev, A. J. Austin, R. Cammi, C. Pomelli, J. W. Ochterski, R. L. Martin, K. Morokuma, V. G. Zakrzewski, G. A. Voth, P. Salvador, J. J. Dannenberg, S. Dapprich, A. D. Daniels, Ö. Farkas, J. B. Foresman, J. V. Ortiz, J. Cioslowski and D. J. Fox, *Gaussian 09, Revision B.01*, 2010.

V.  $^1\text{H}$ ,  $^{13}\text{C}$  and  $^{31}\text{P}$  NMR spectra for compounds **1b**, **3a-m**

(**1b**)

( $^1\text{H}$ )

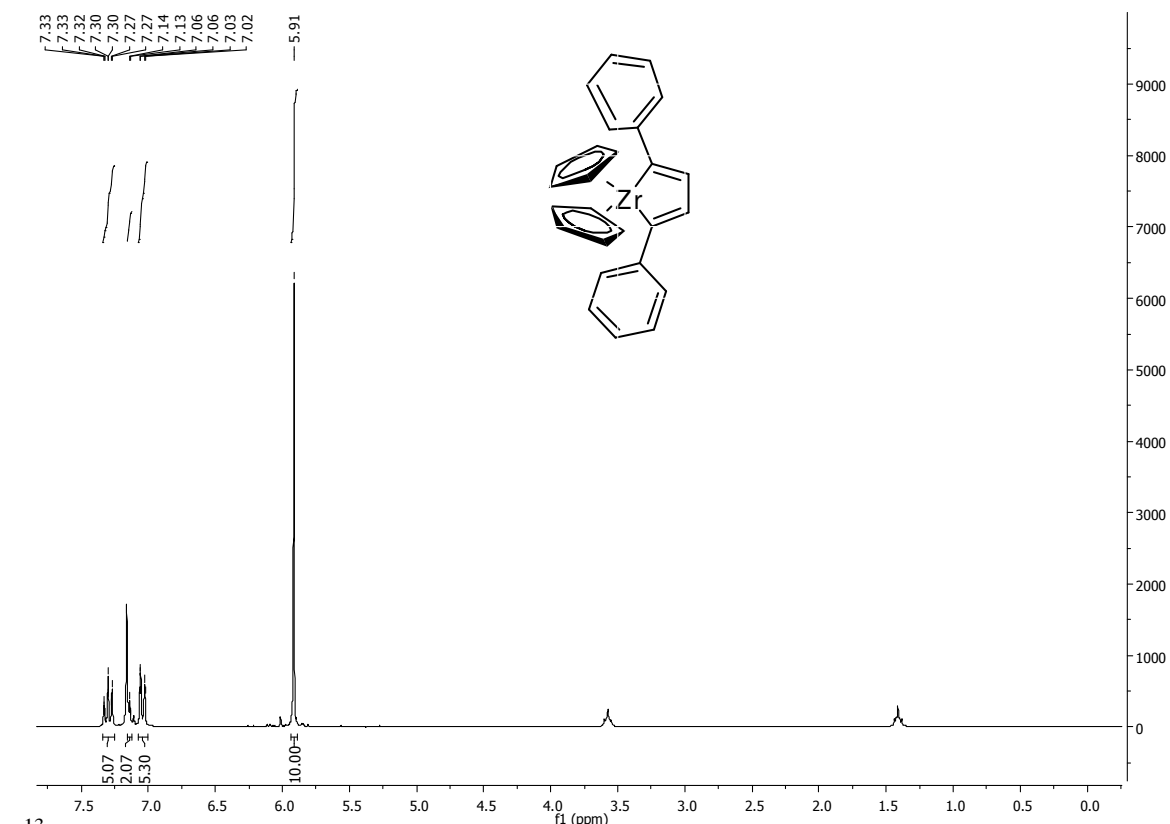

( $^{13}\text{C}$ )

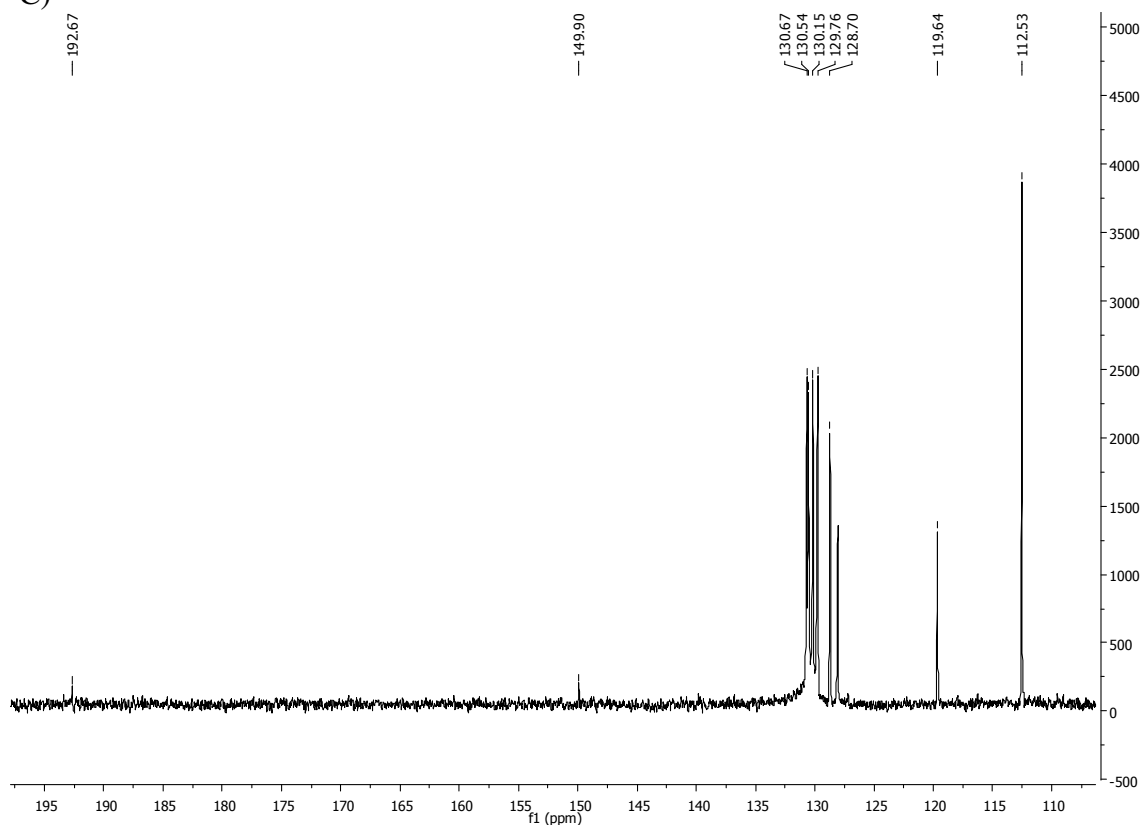

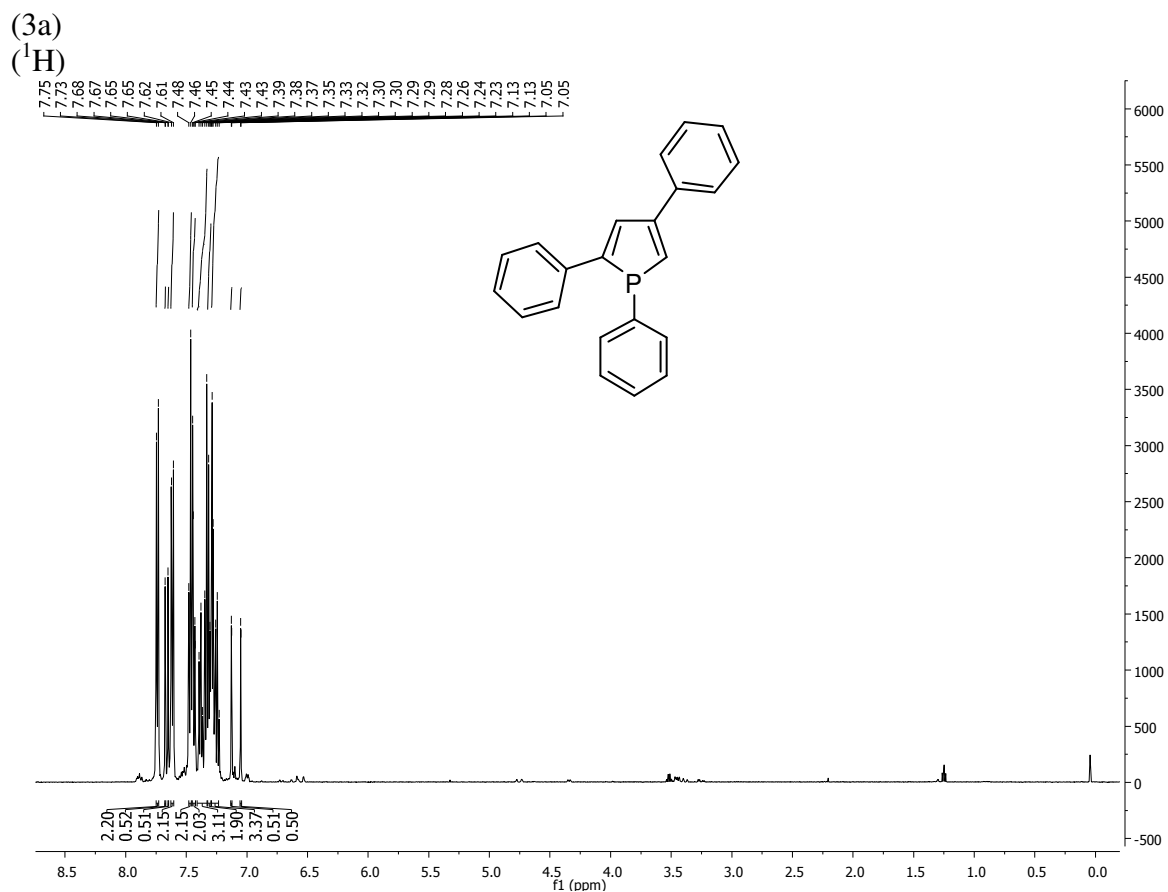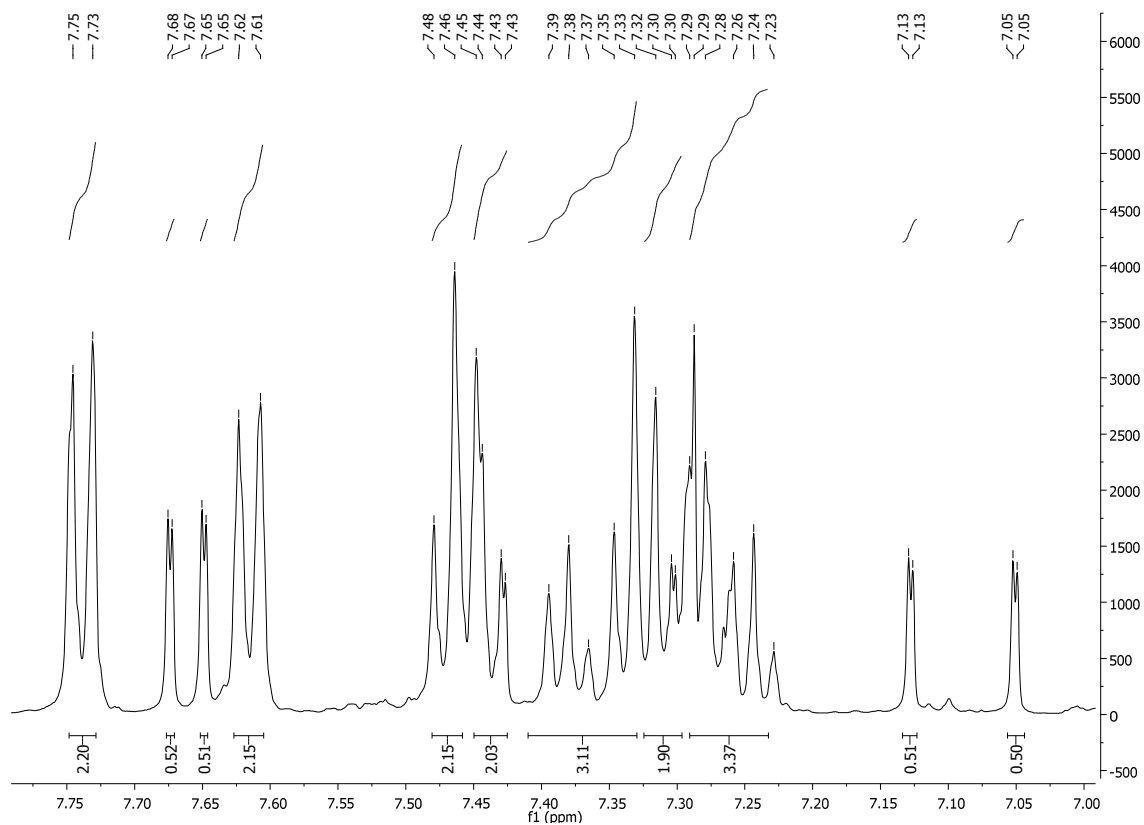

$^{13}\text{C}$

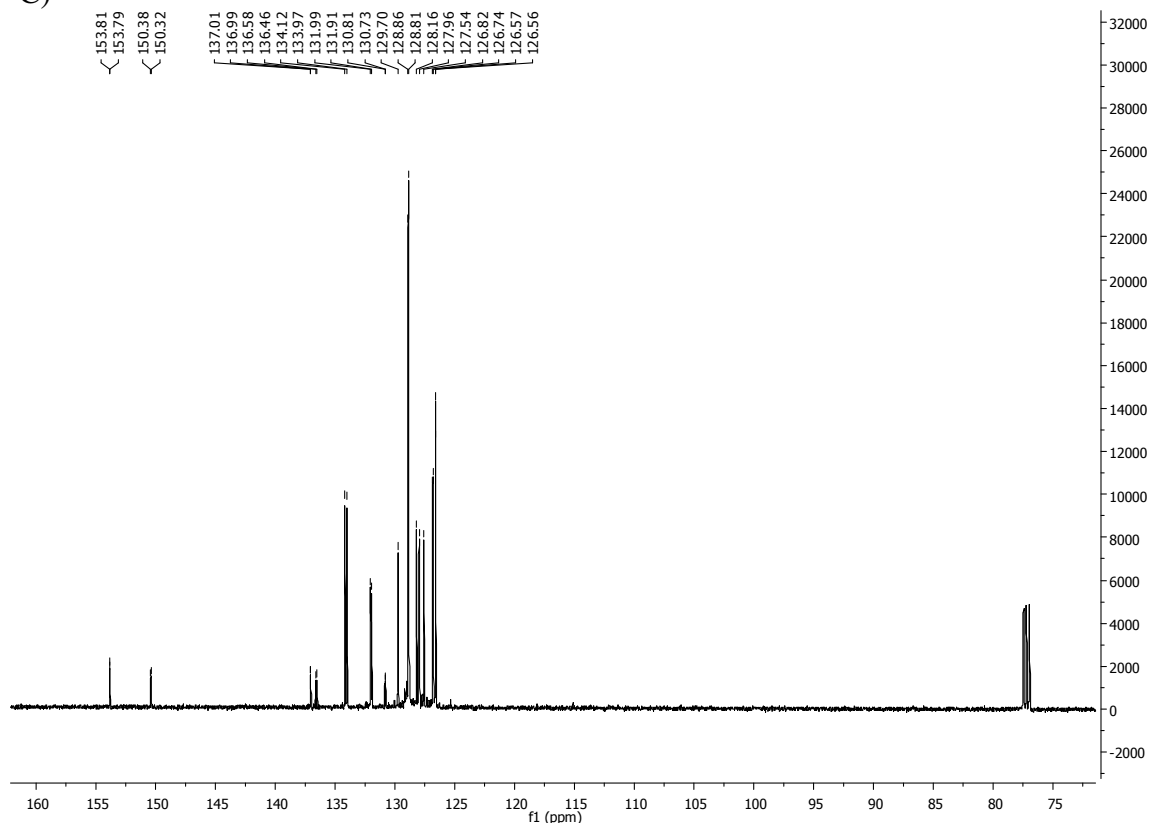

$^{31}\text{P}$

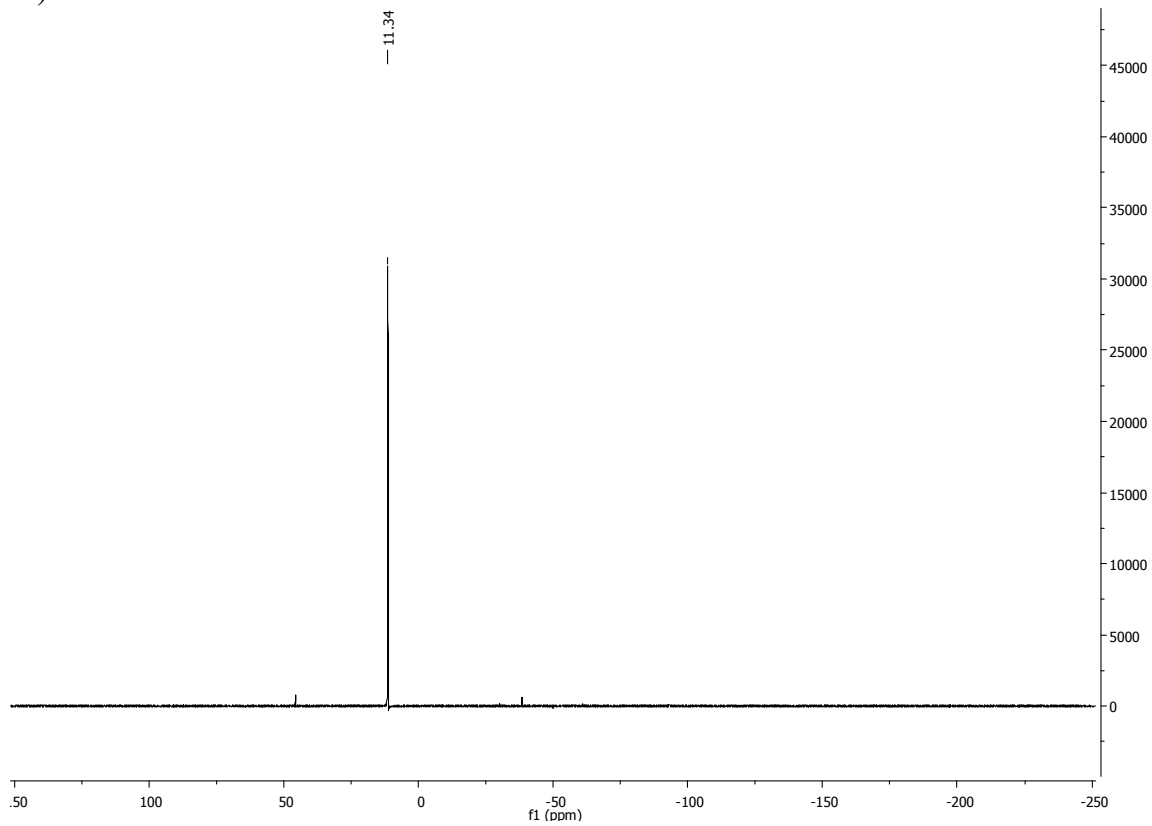

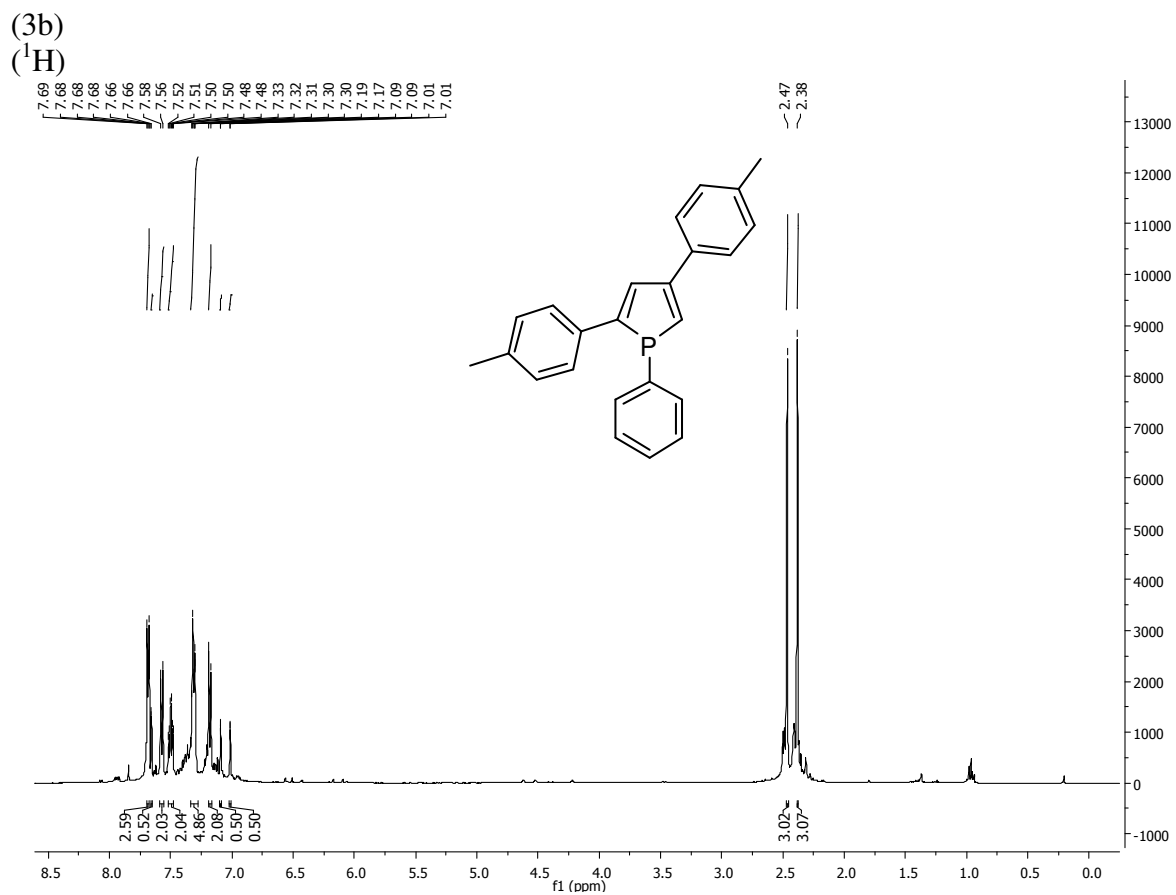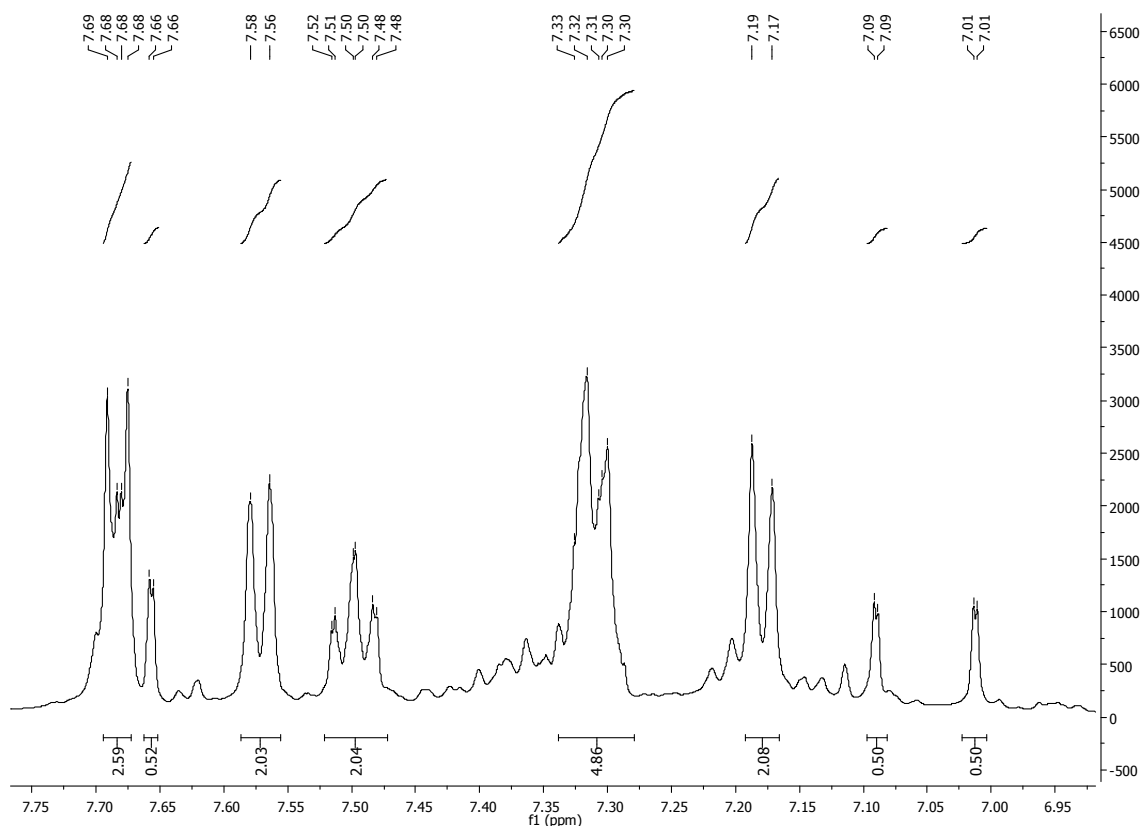

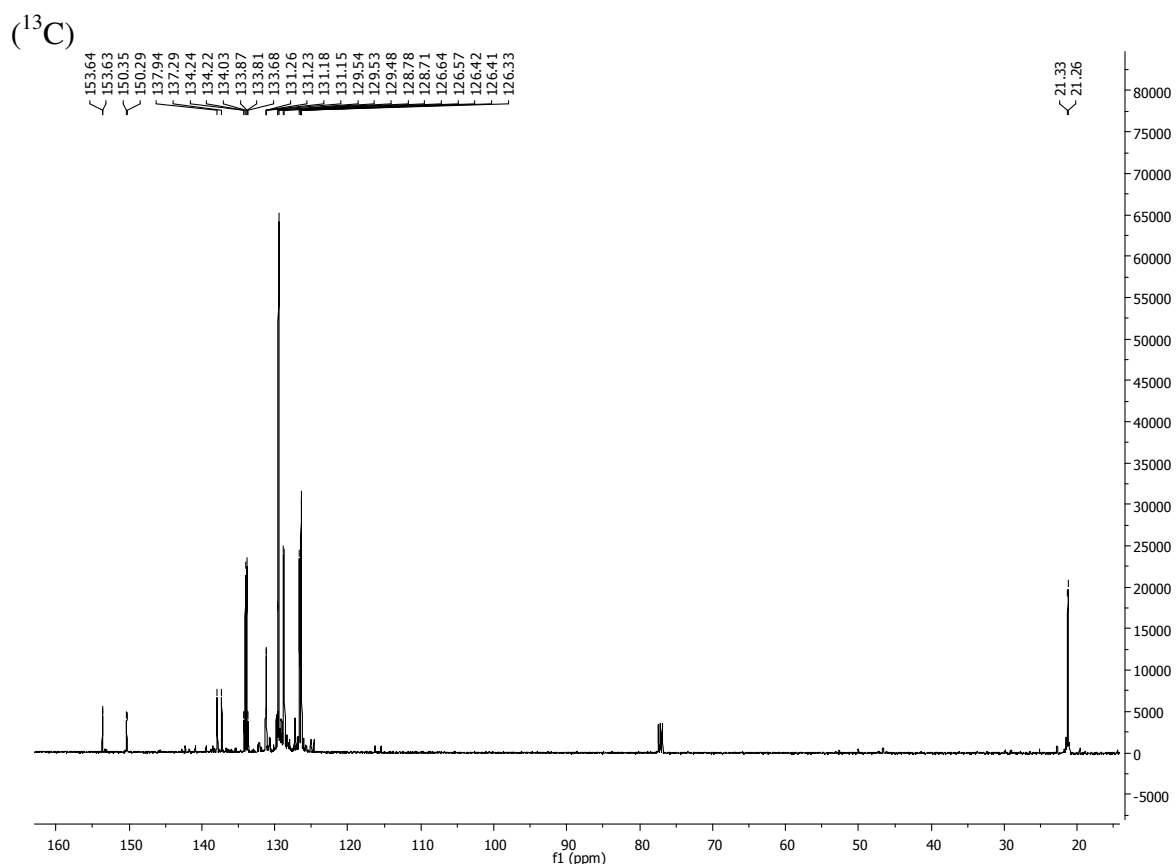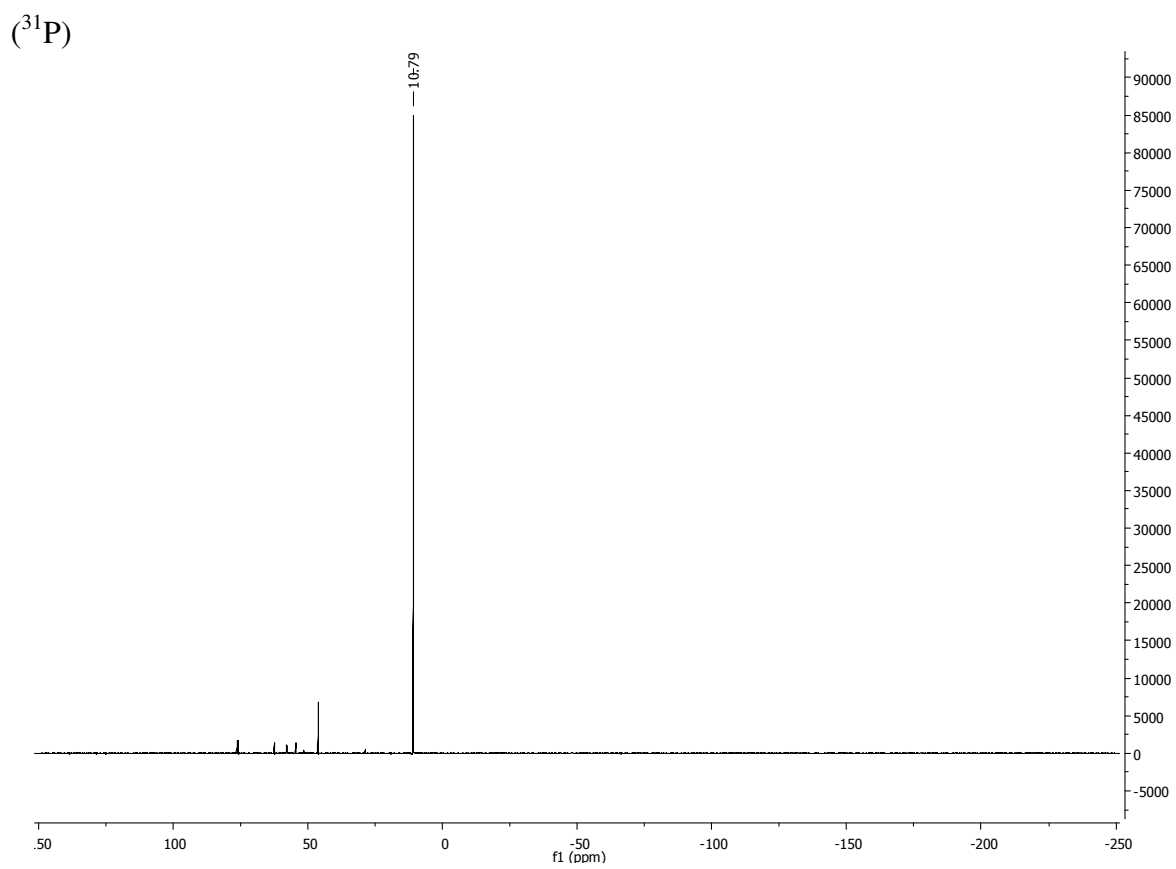

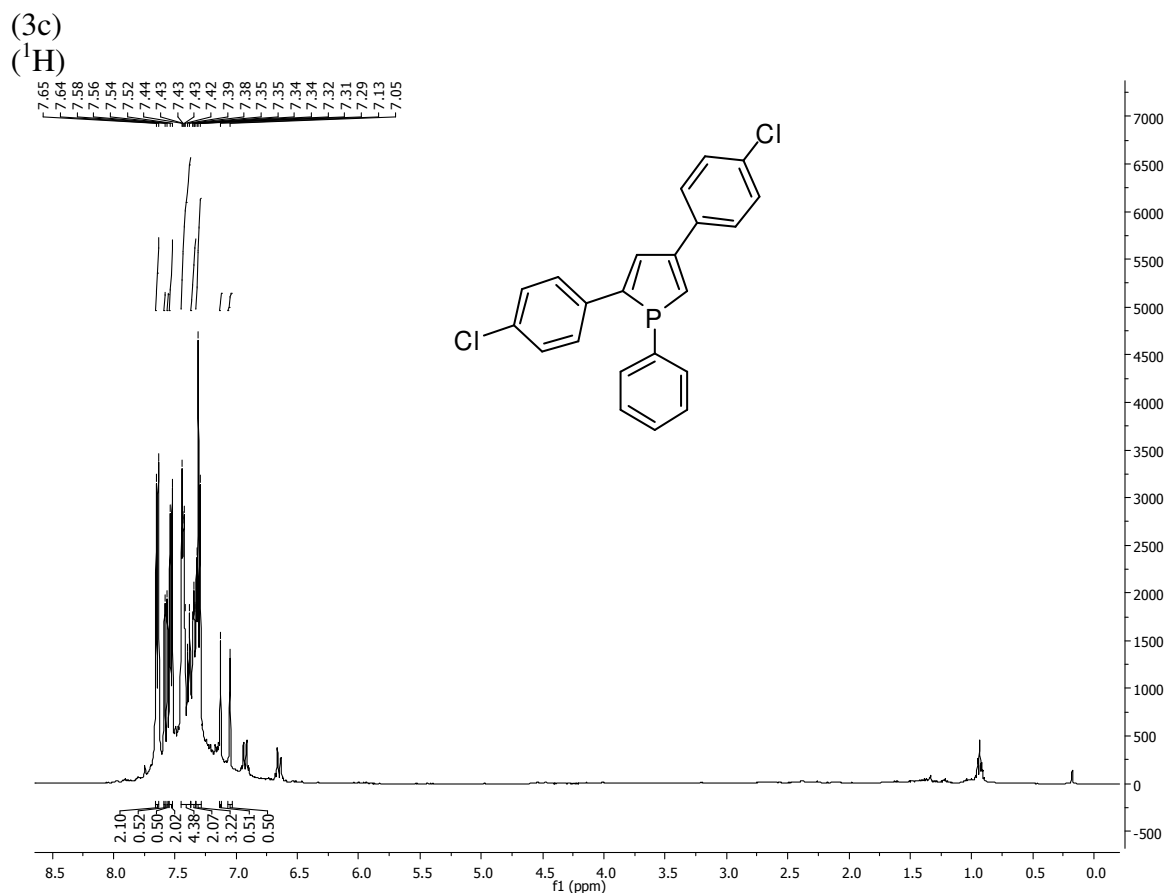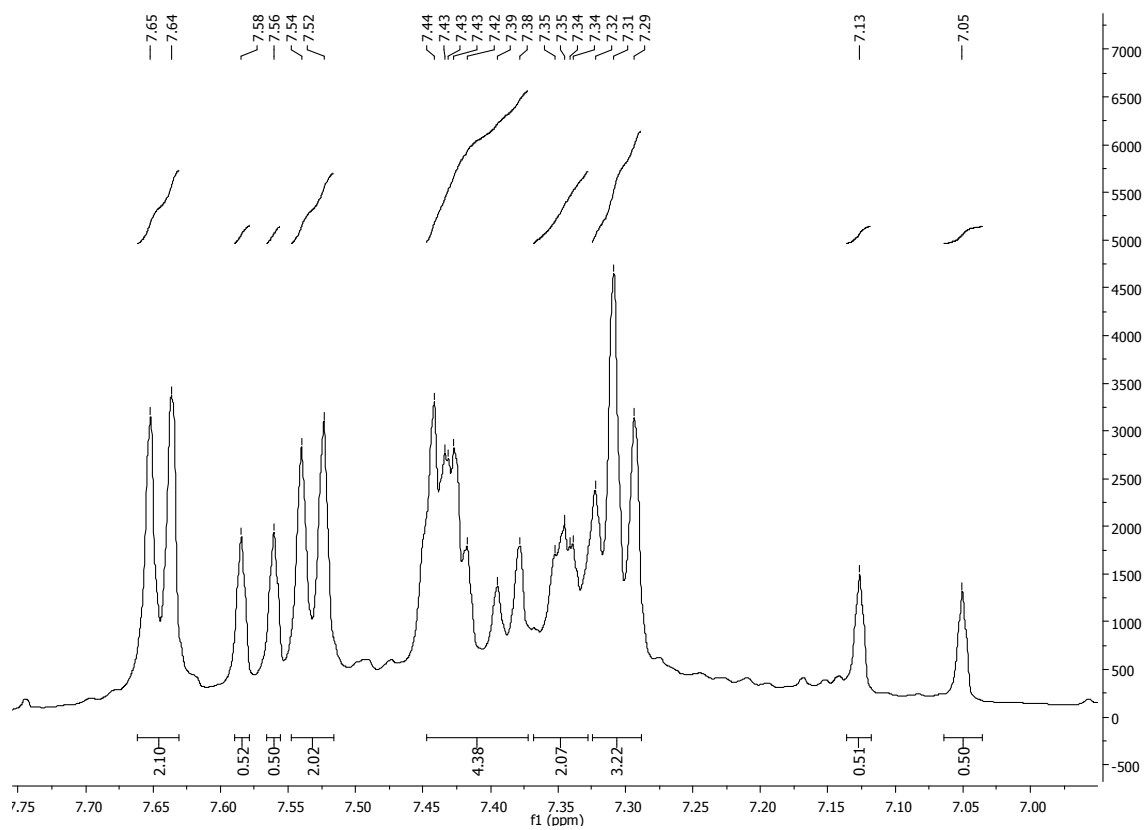



$^{13}\text{C}$

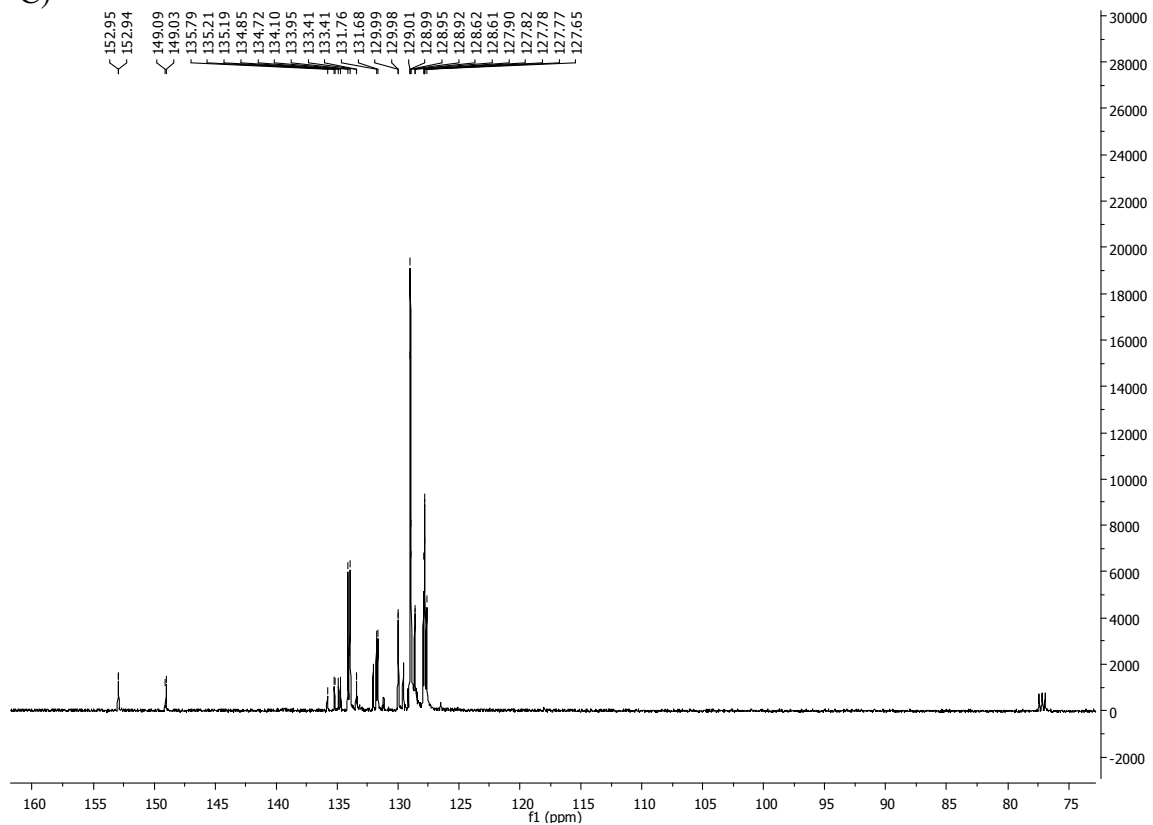

$^{31}\text{P}$

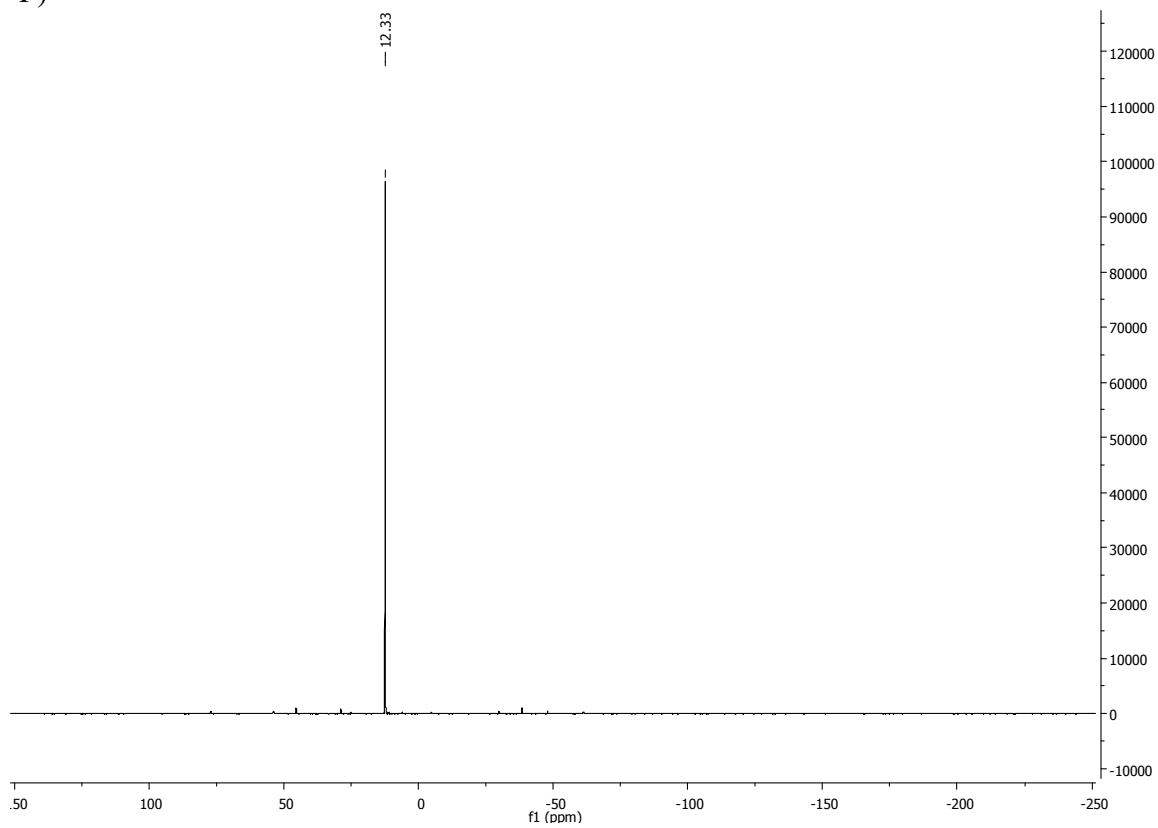

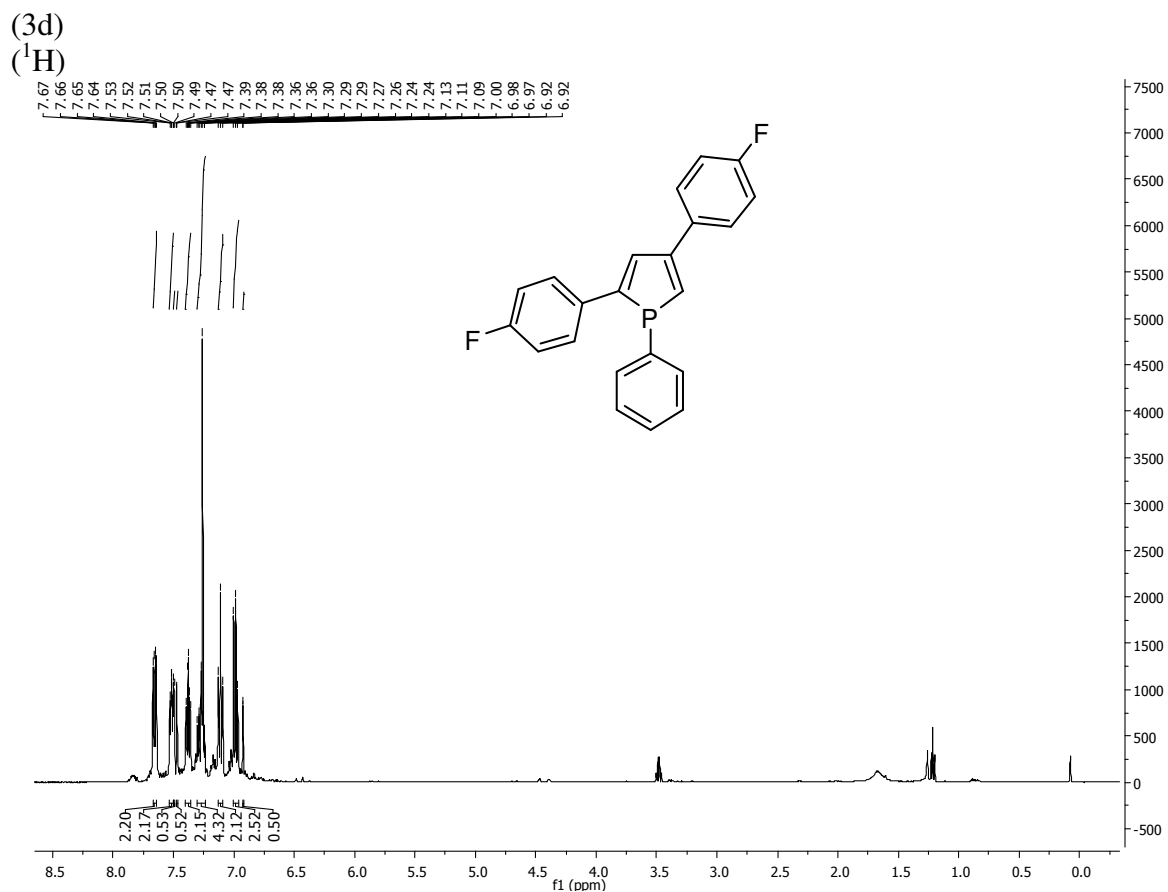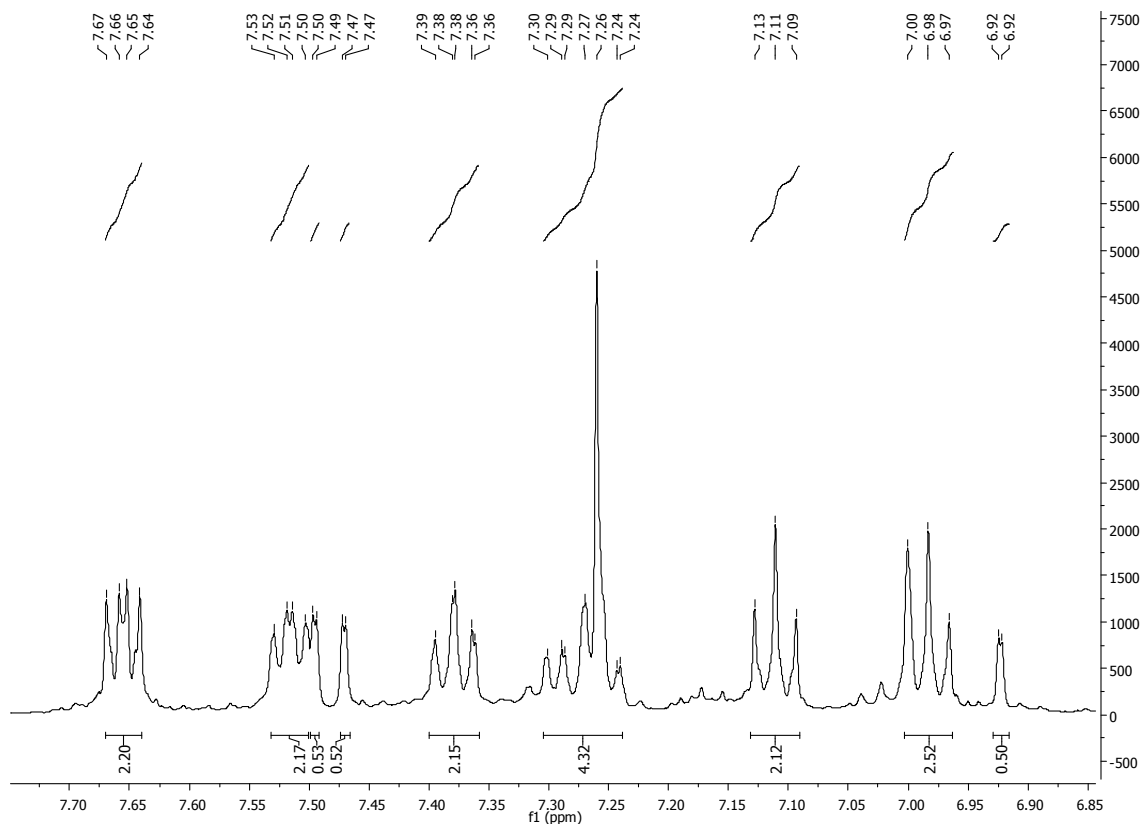

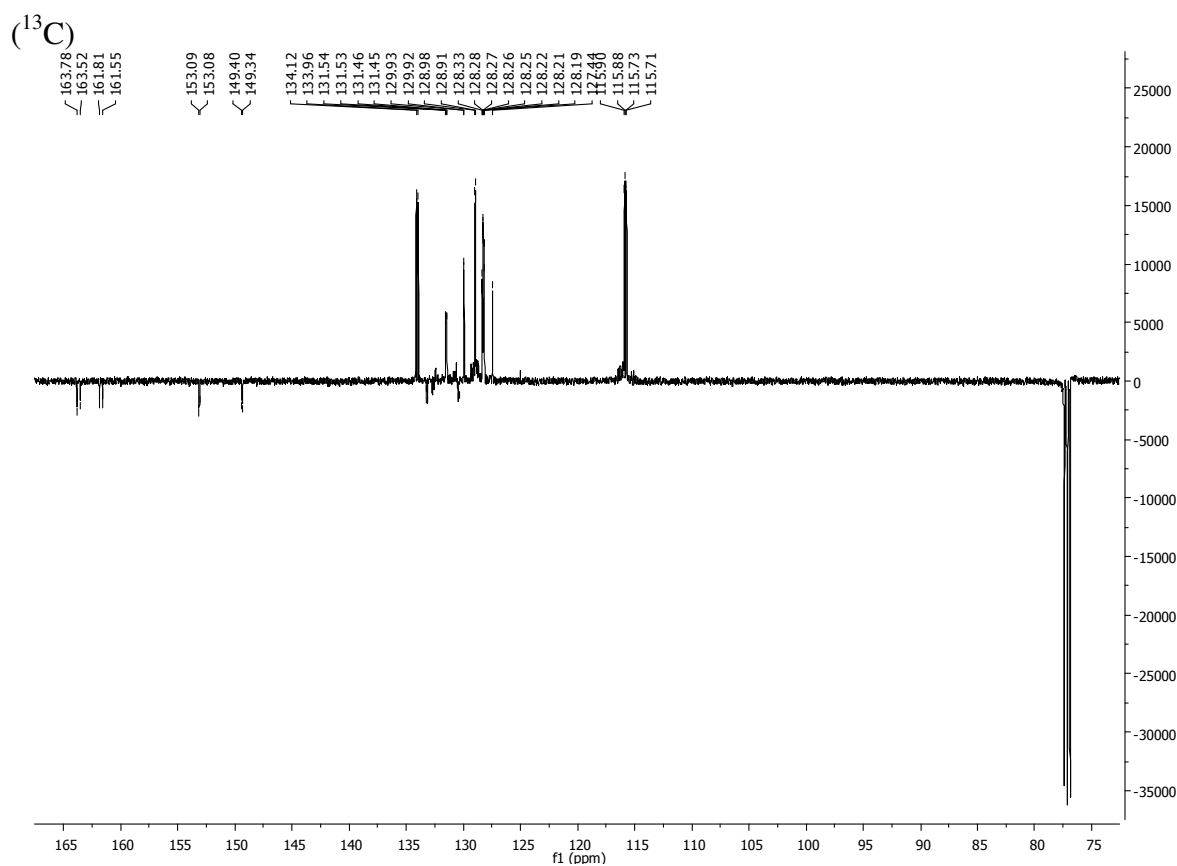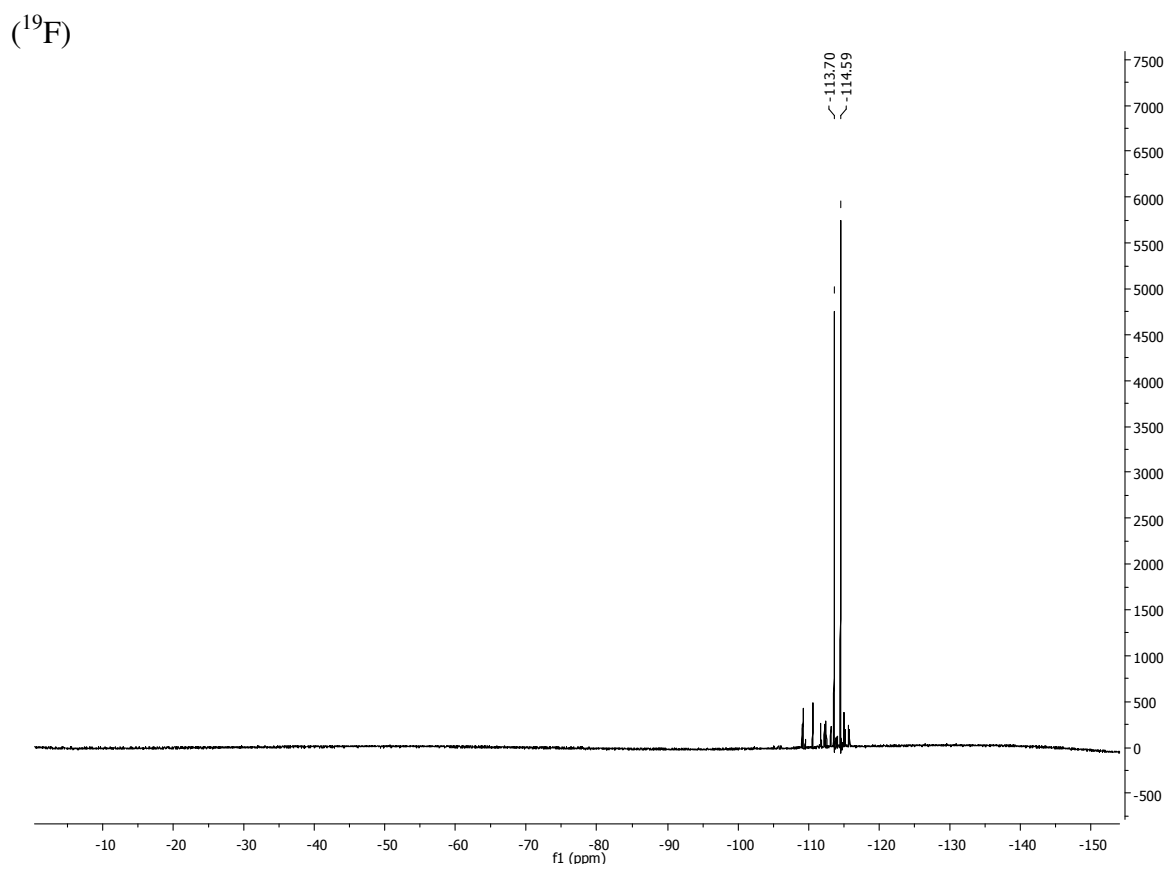

$(^{31}\text{P})$

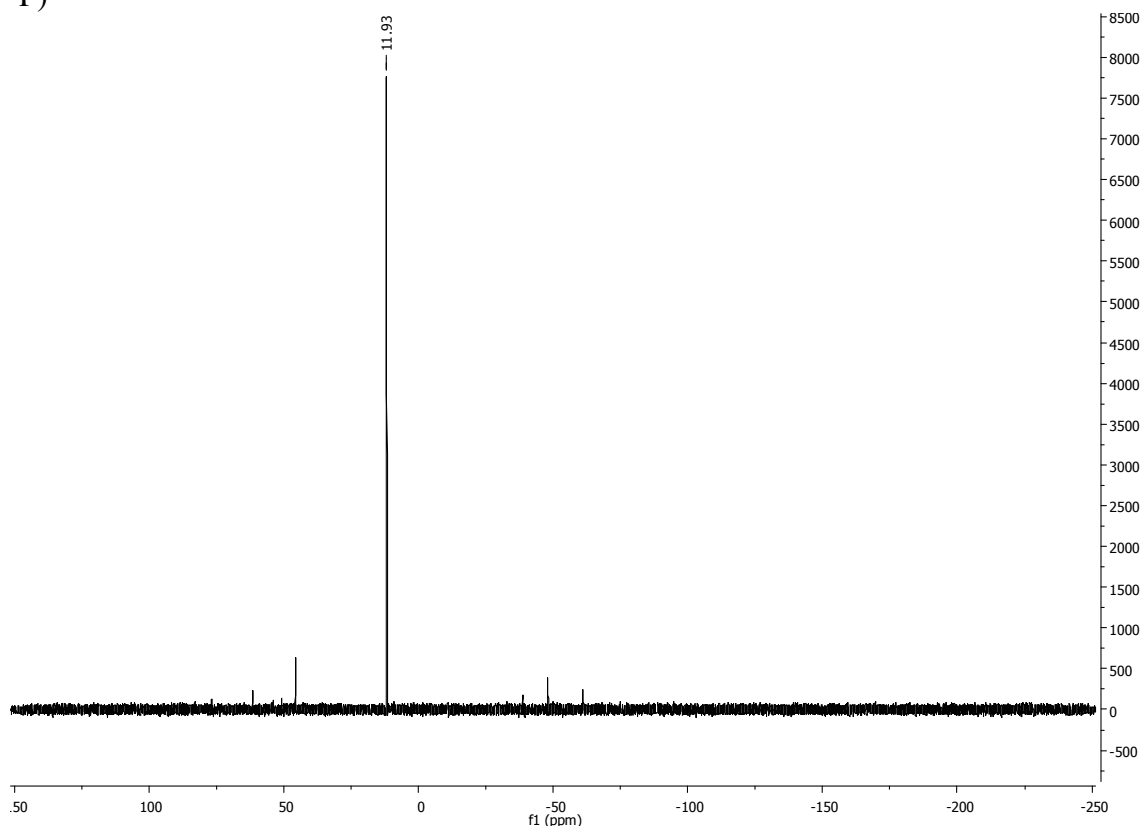

$(^1\text{H})$

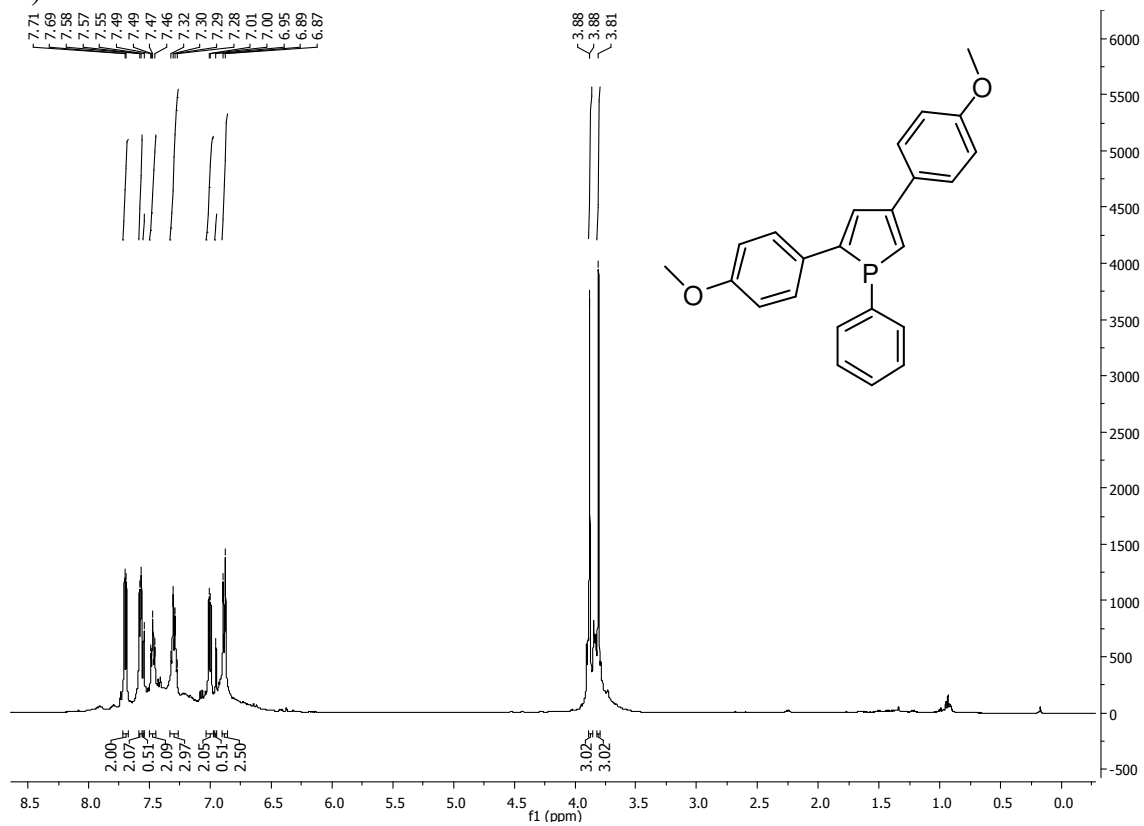

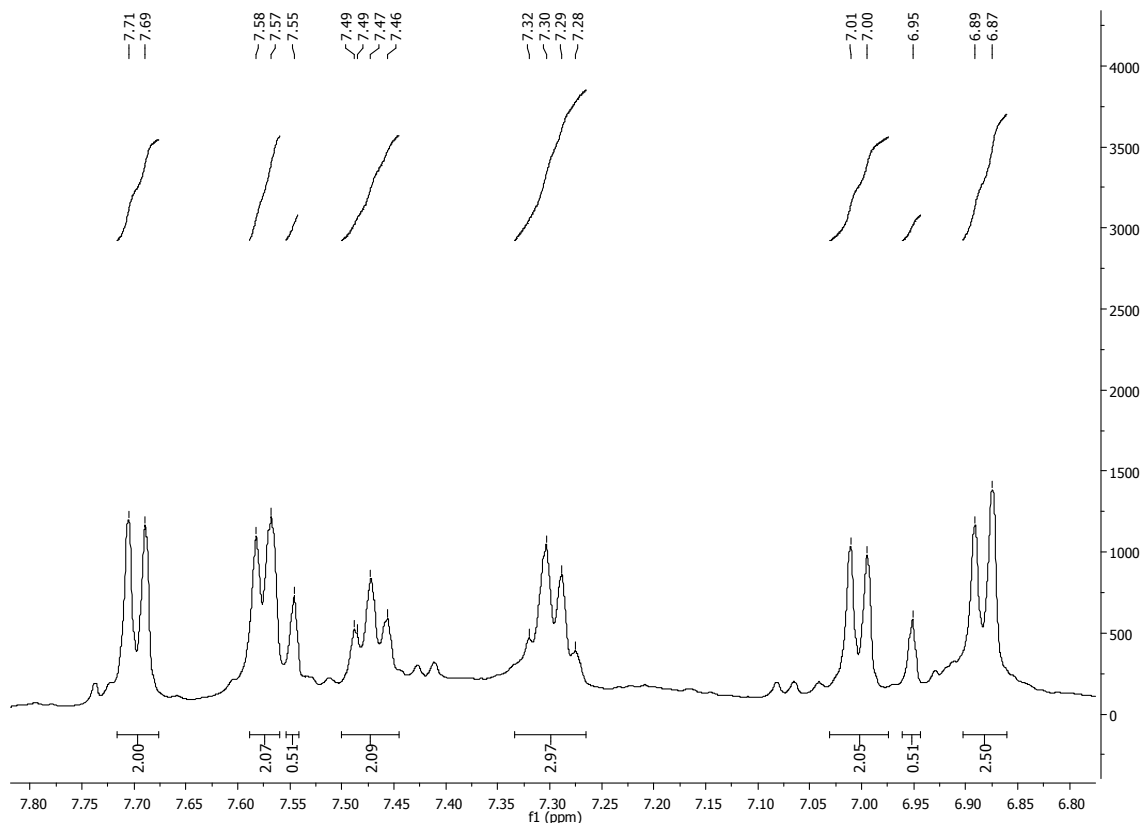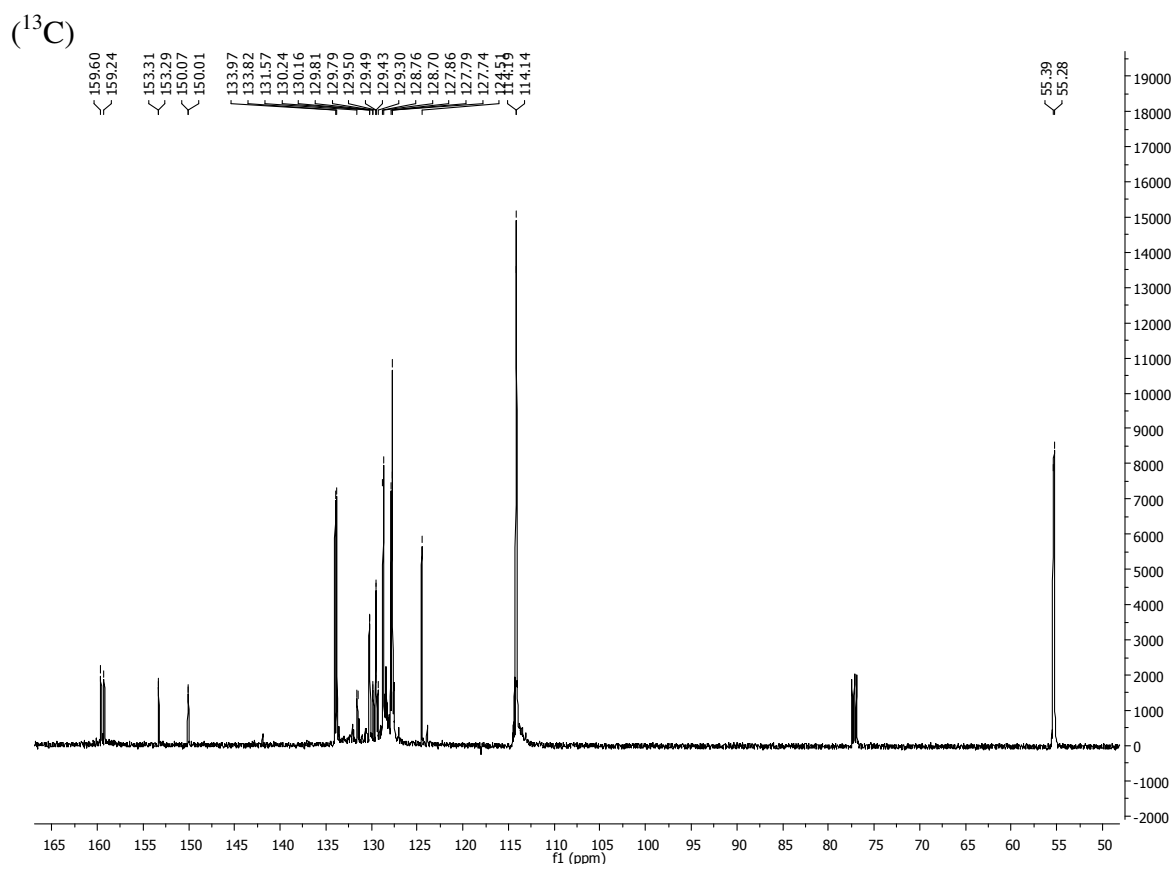

$^{31}\text{P}$

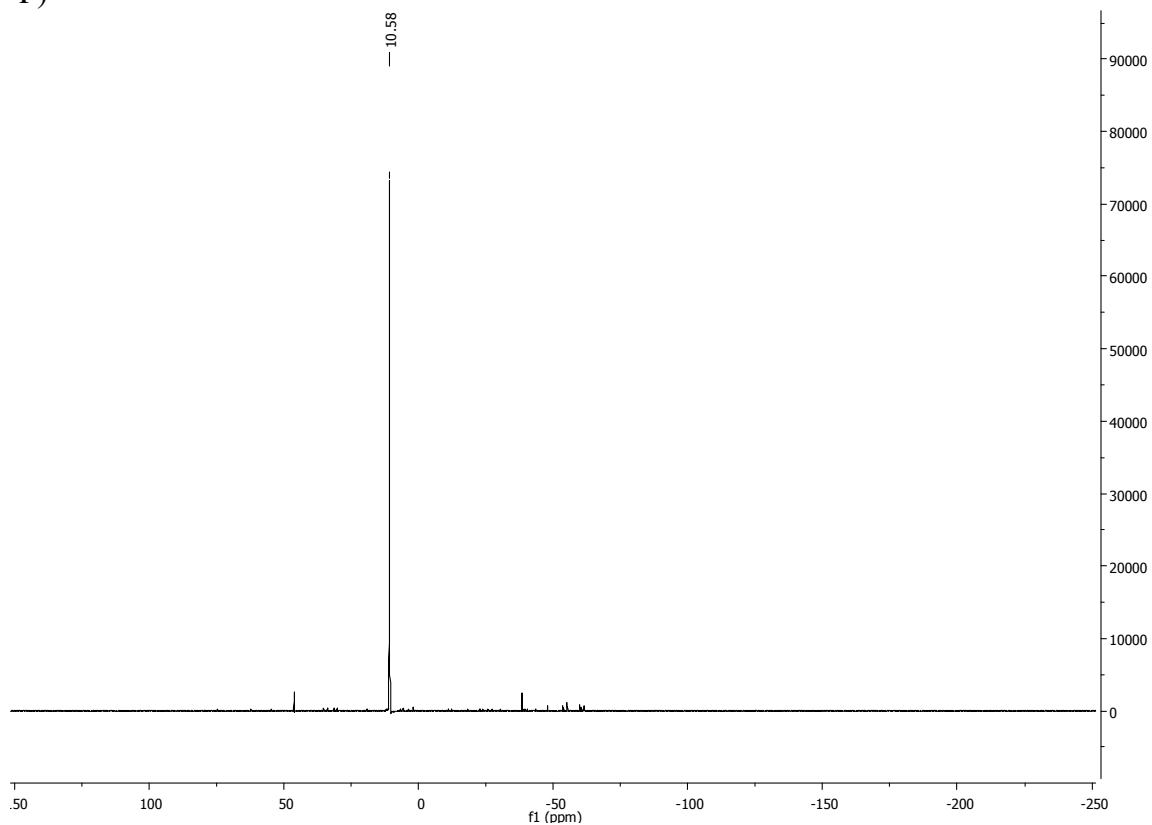

$^1\text{H}$

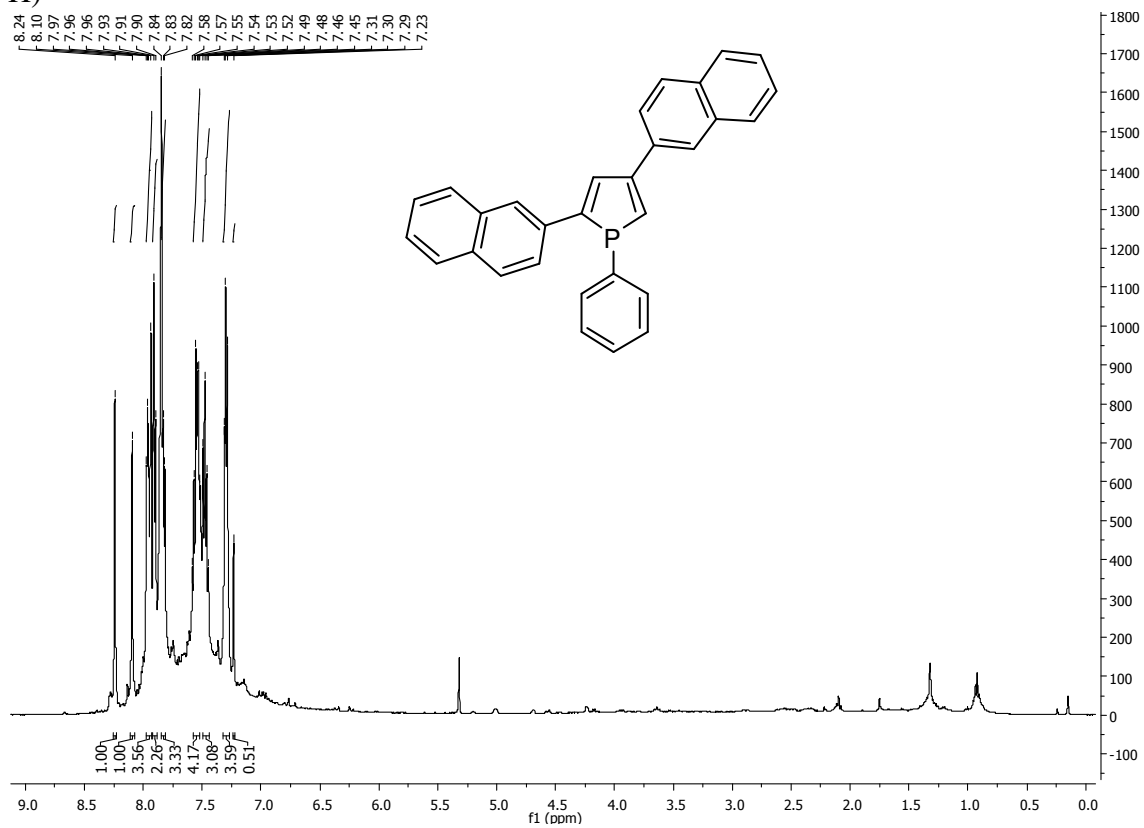

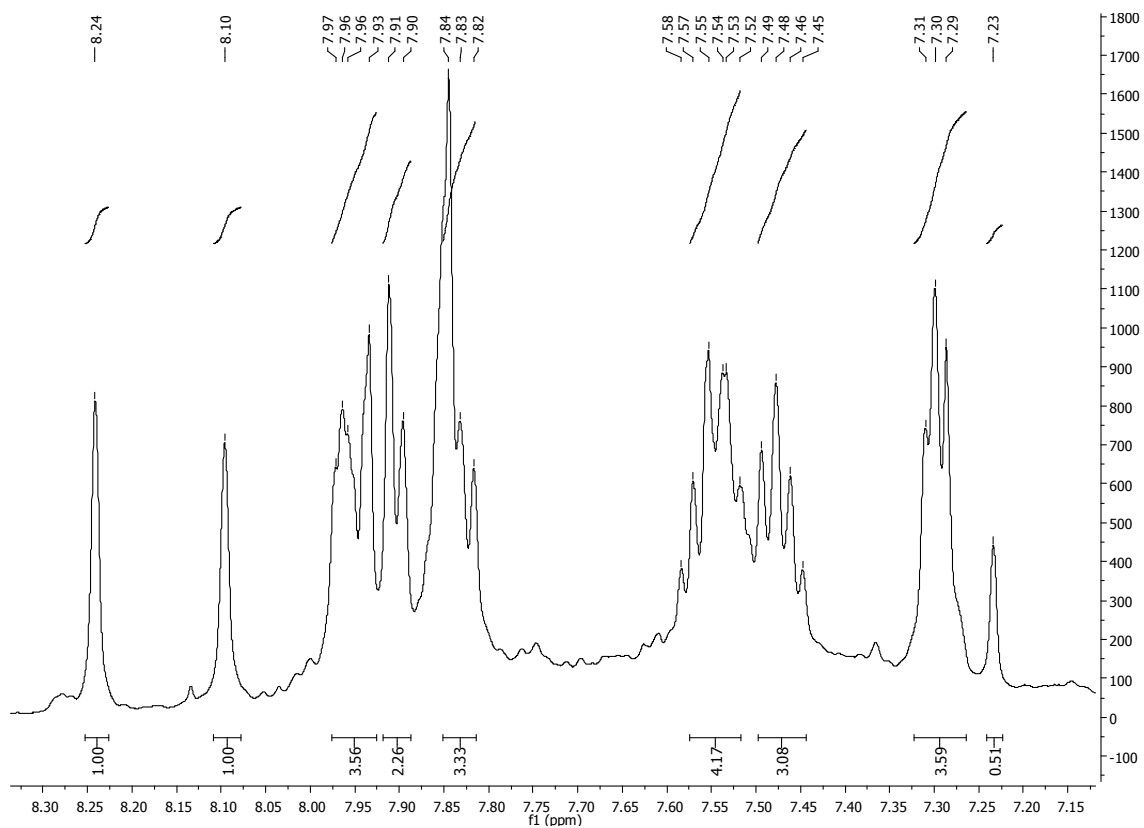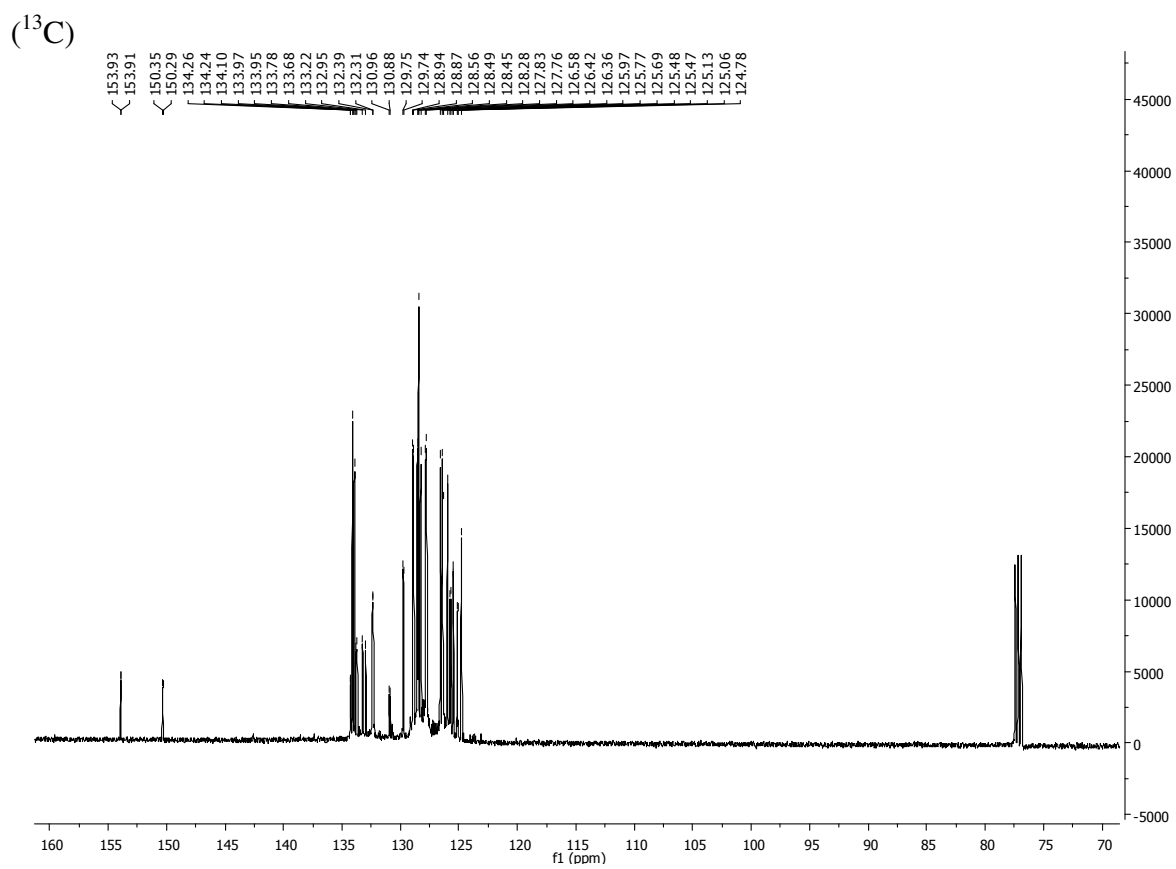

$^{31}\text{P}$

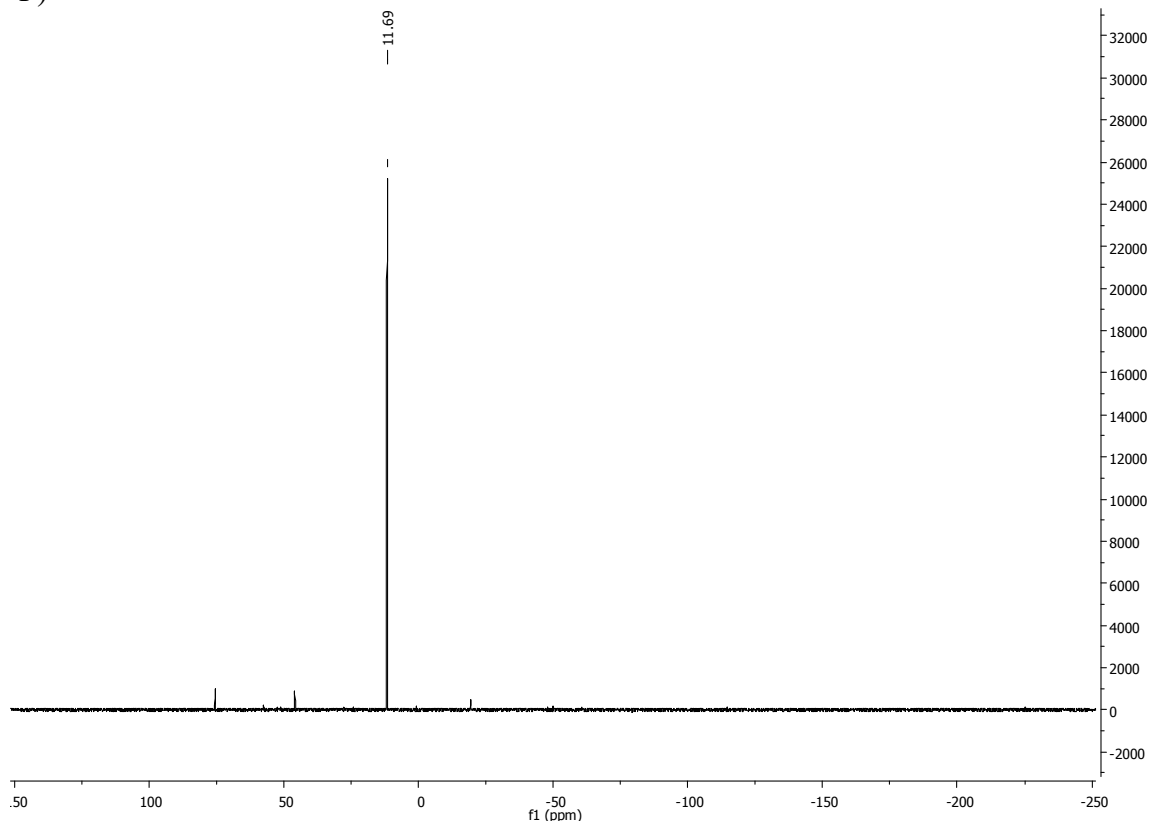

(3g)  
 $^1\text{H}$

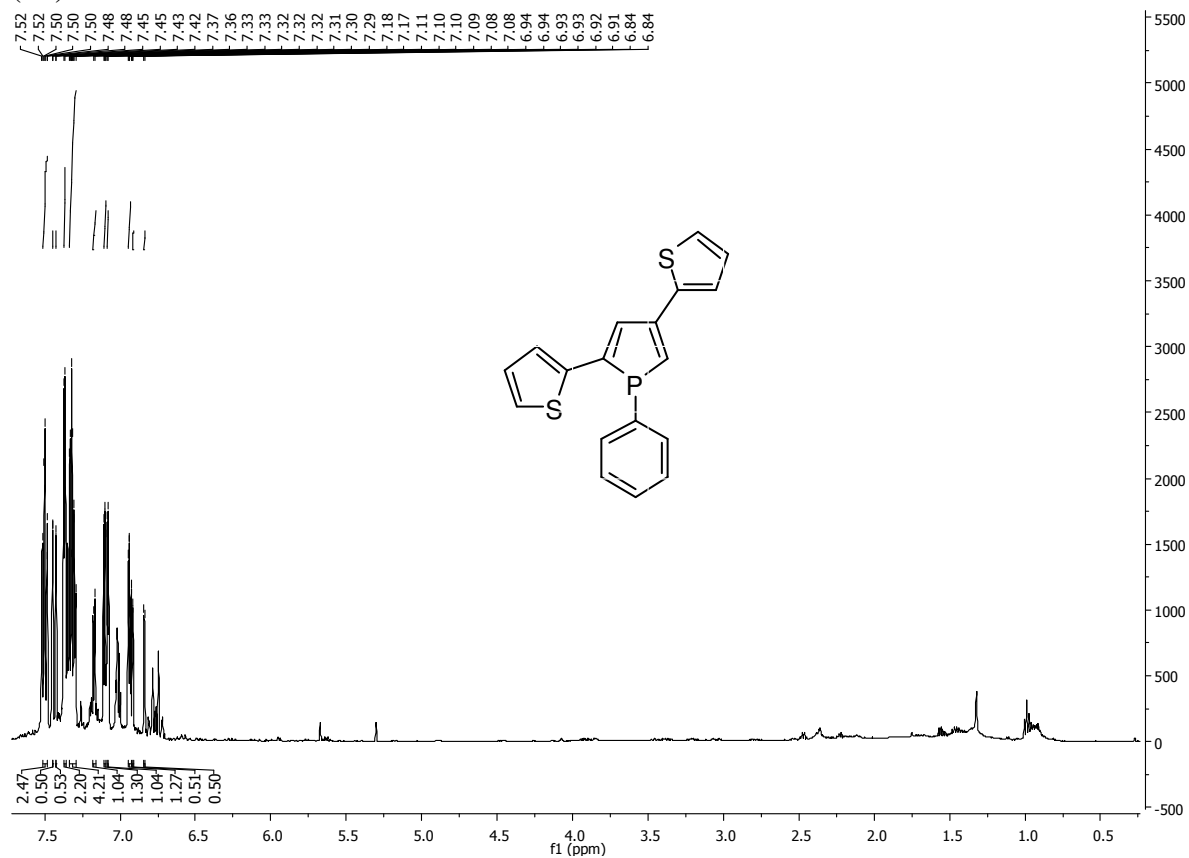



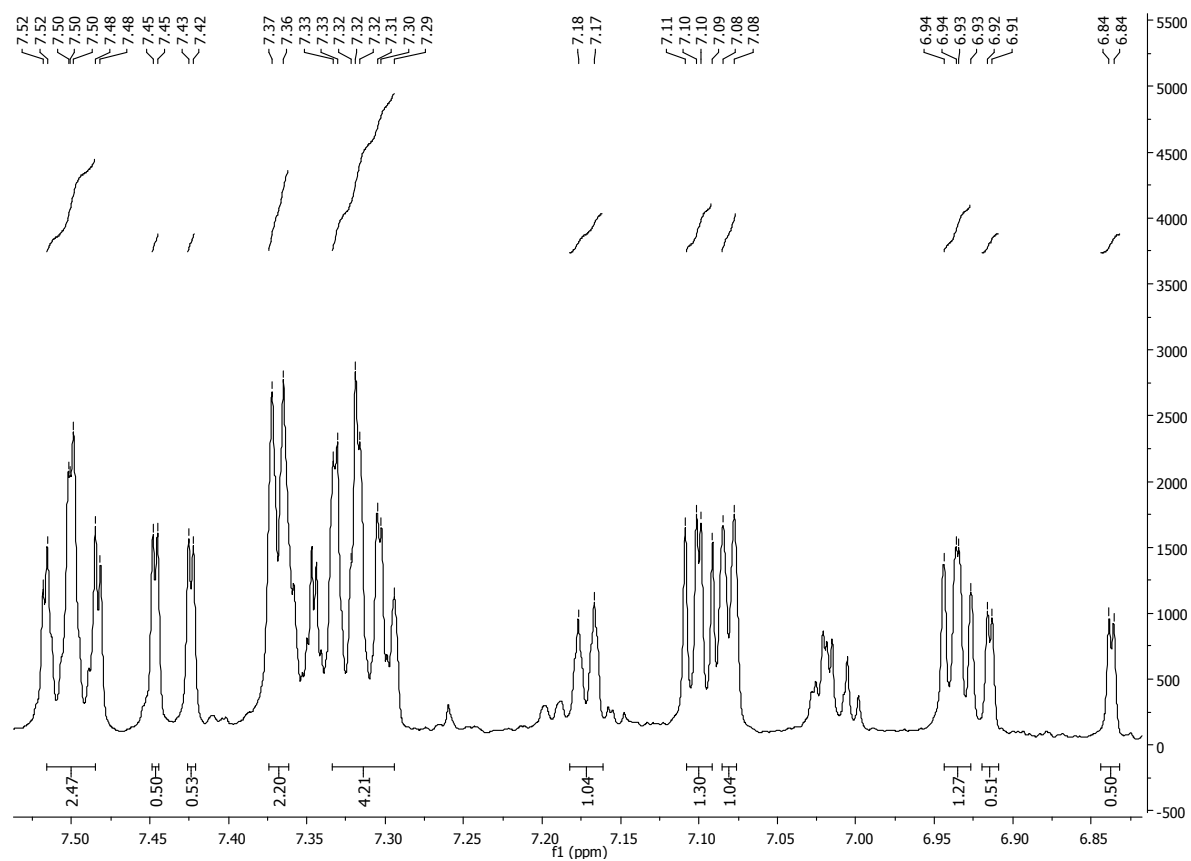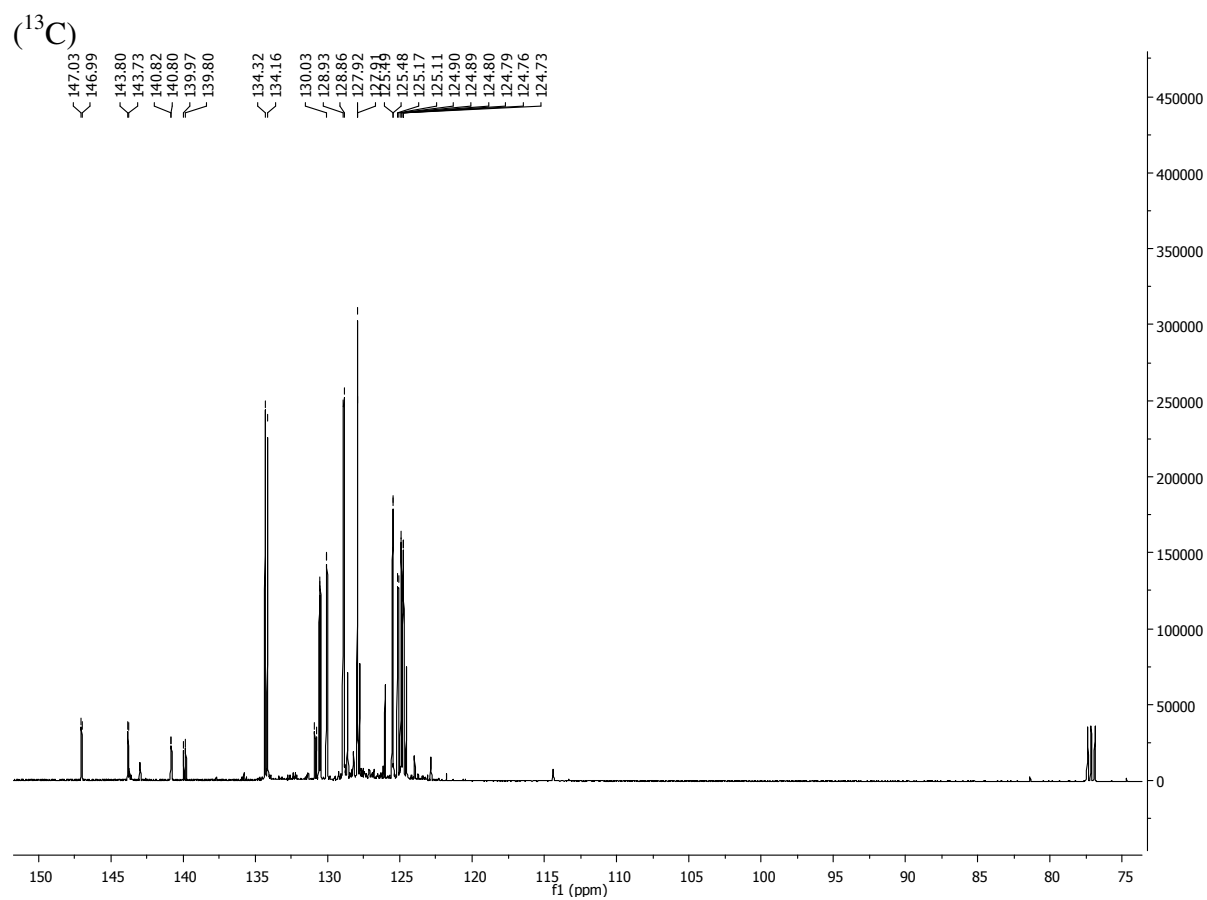

$^{31}\text{P}$

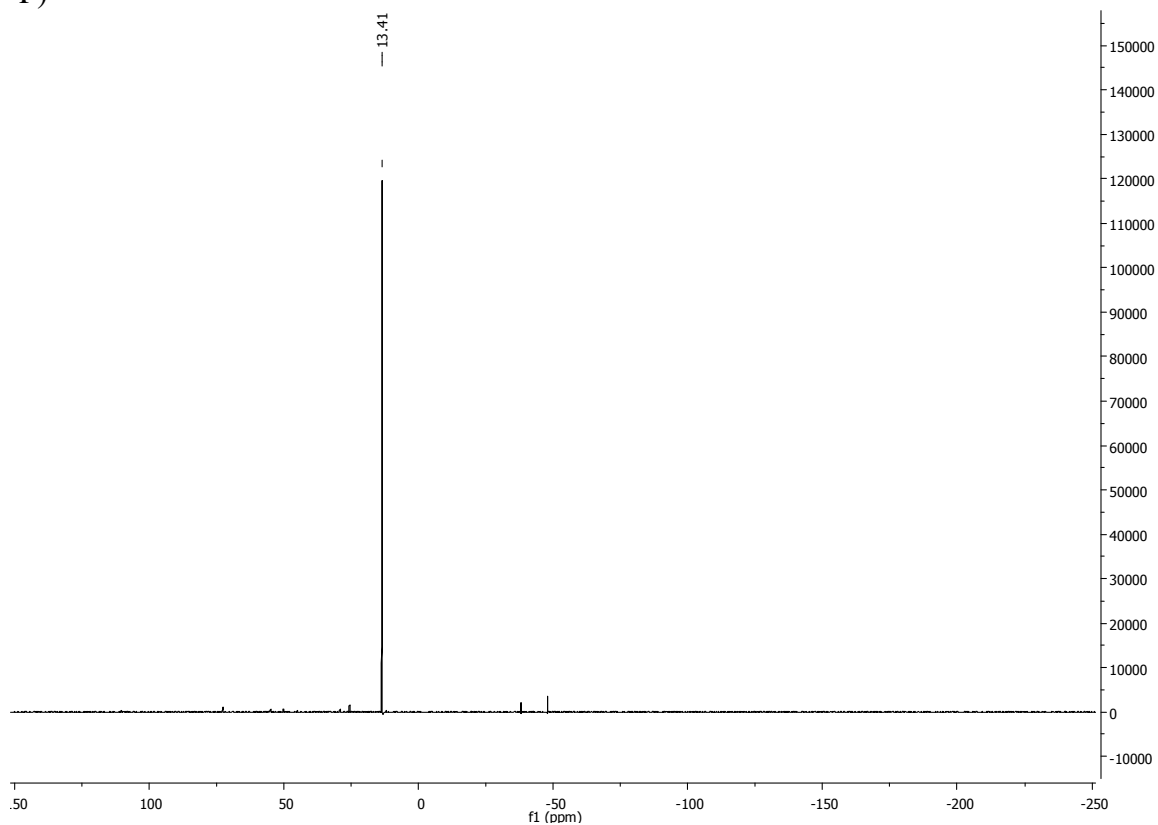

$^1\text{H}$

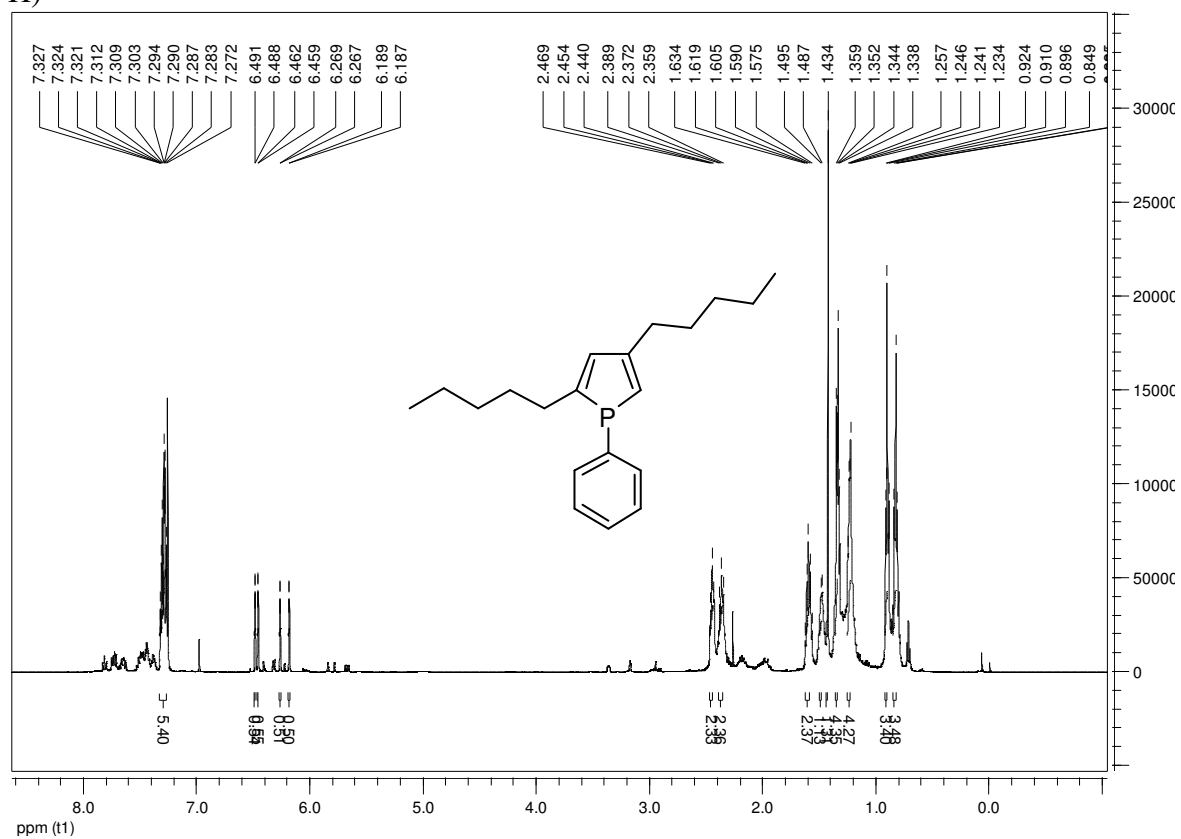

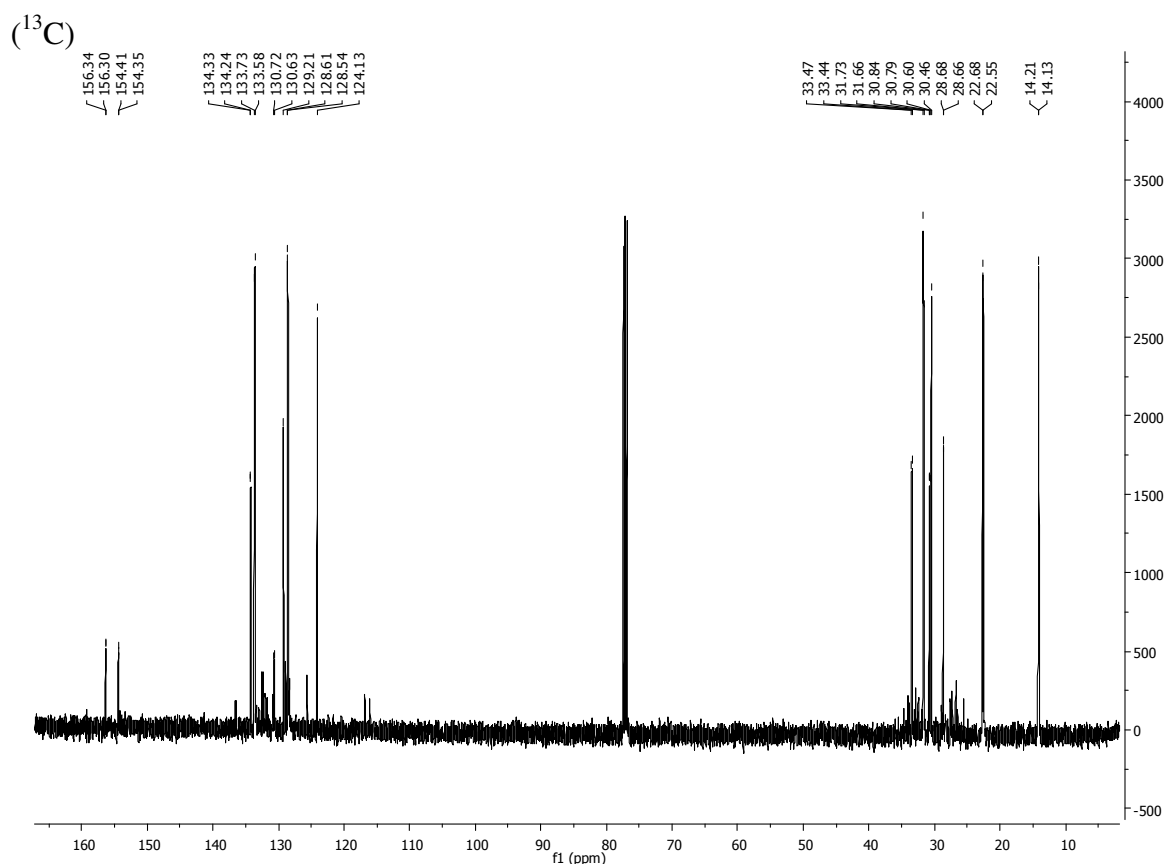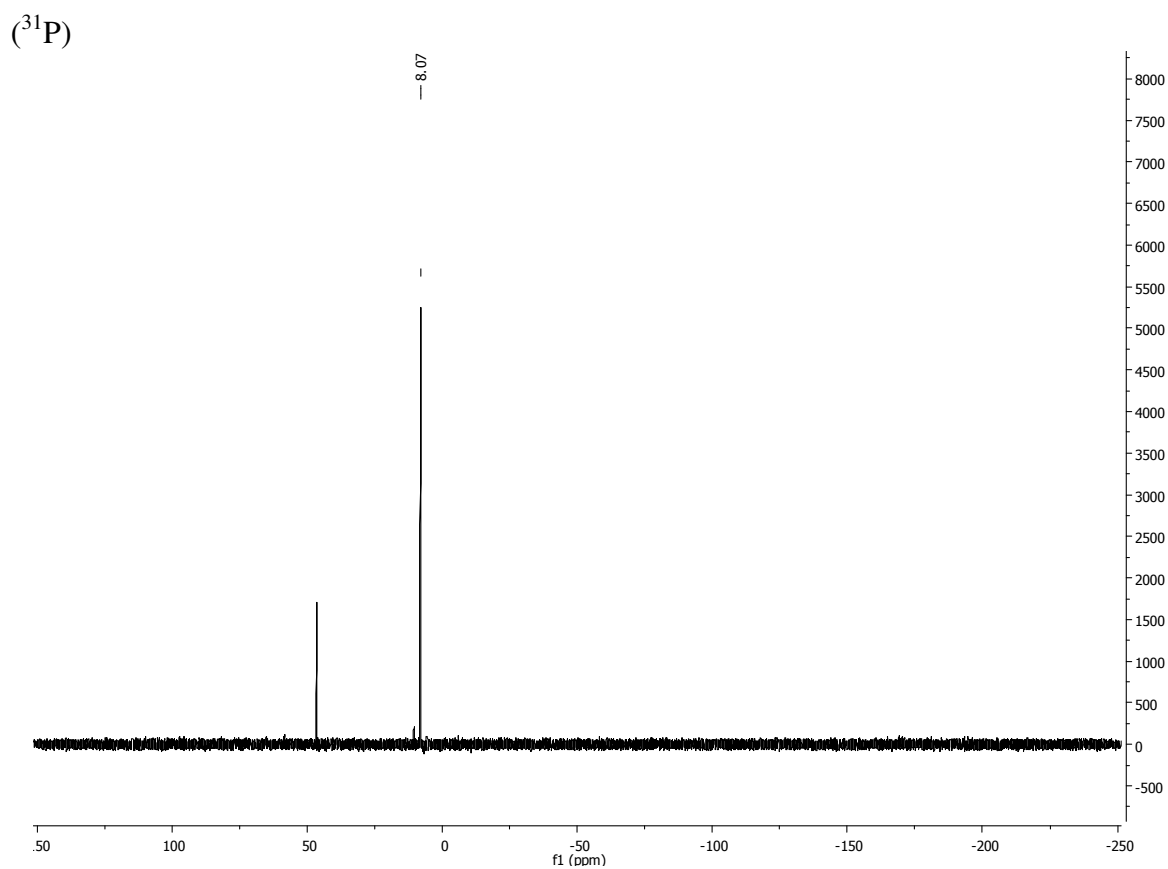

(3i)  
(<sup>1</sup>H)

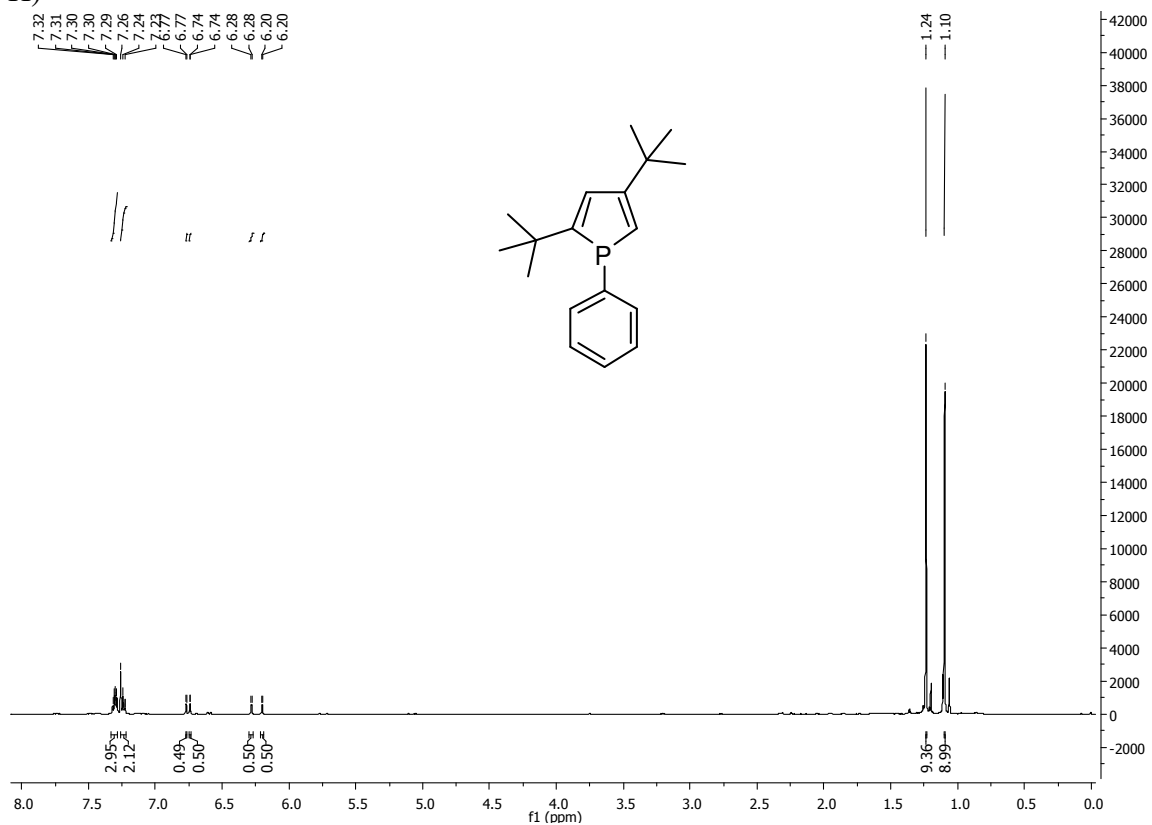

(<sup>13</sup>C)

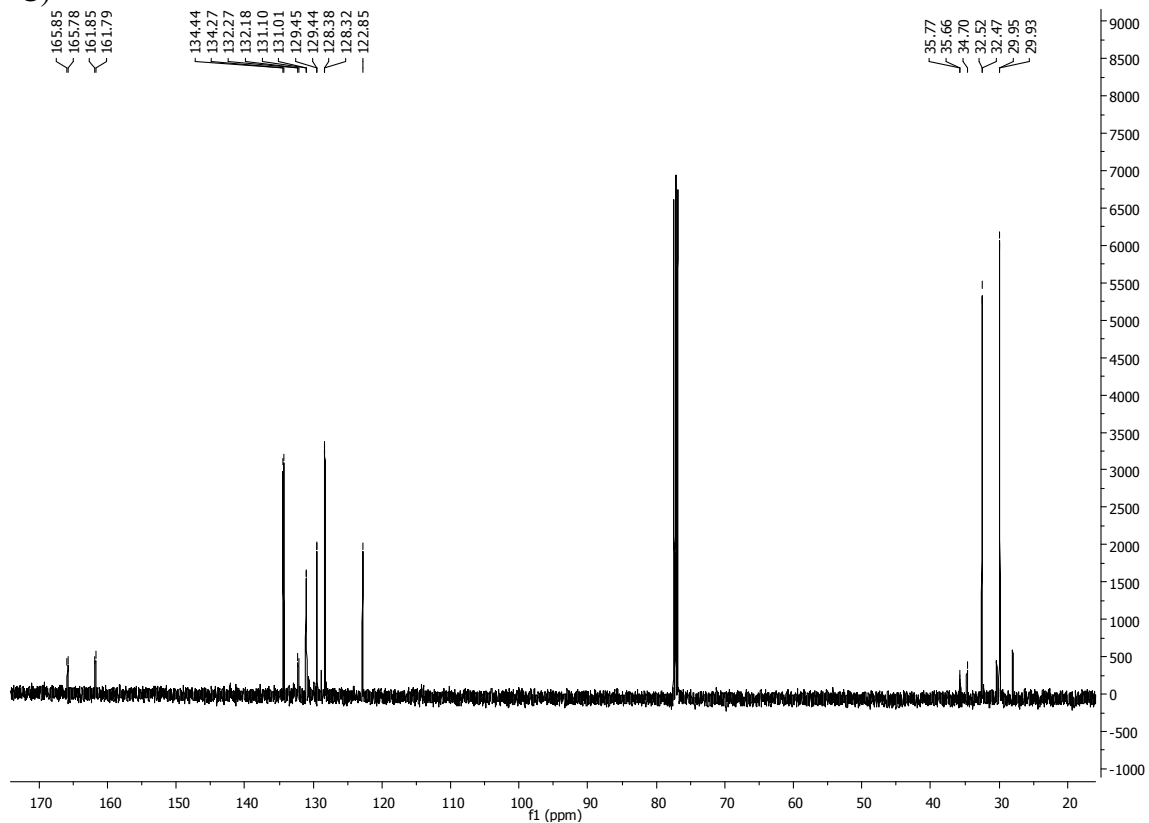

$^{31}\text{P}$

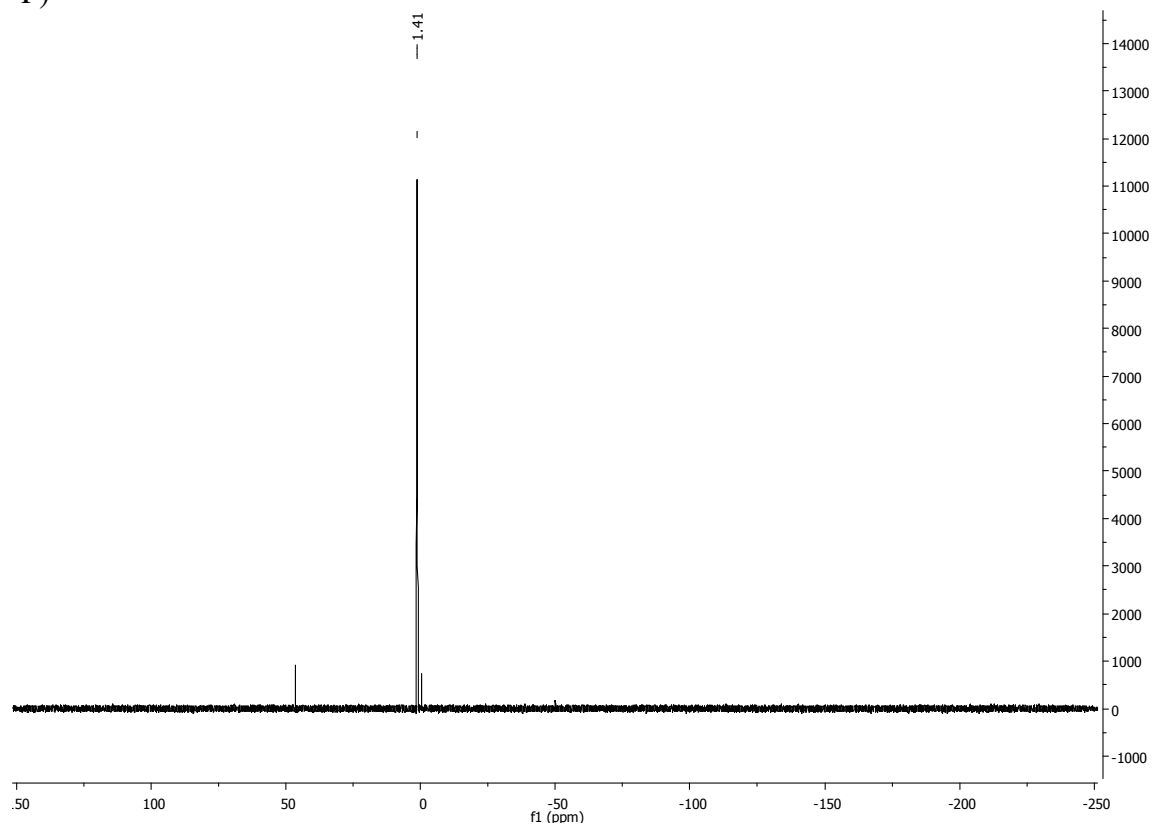

(3j)  
 $^1\text{H}$

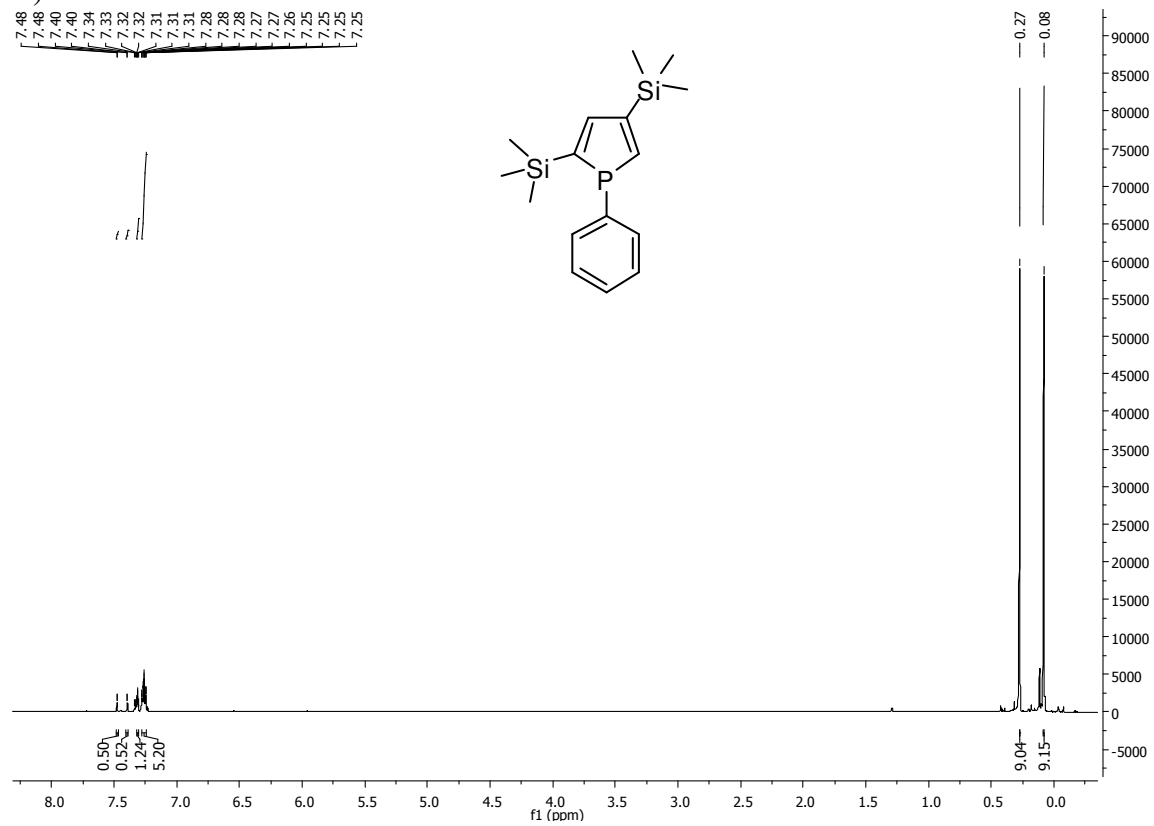

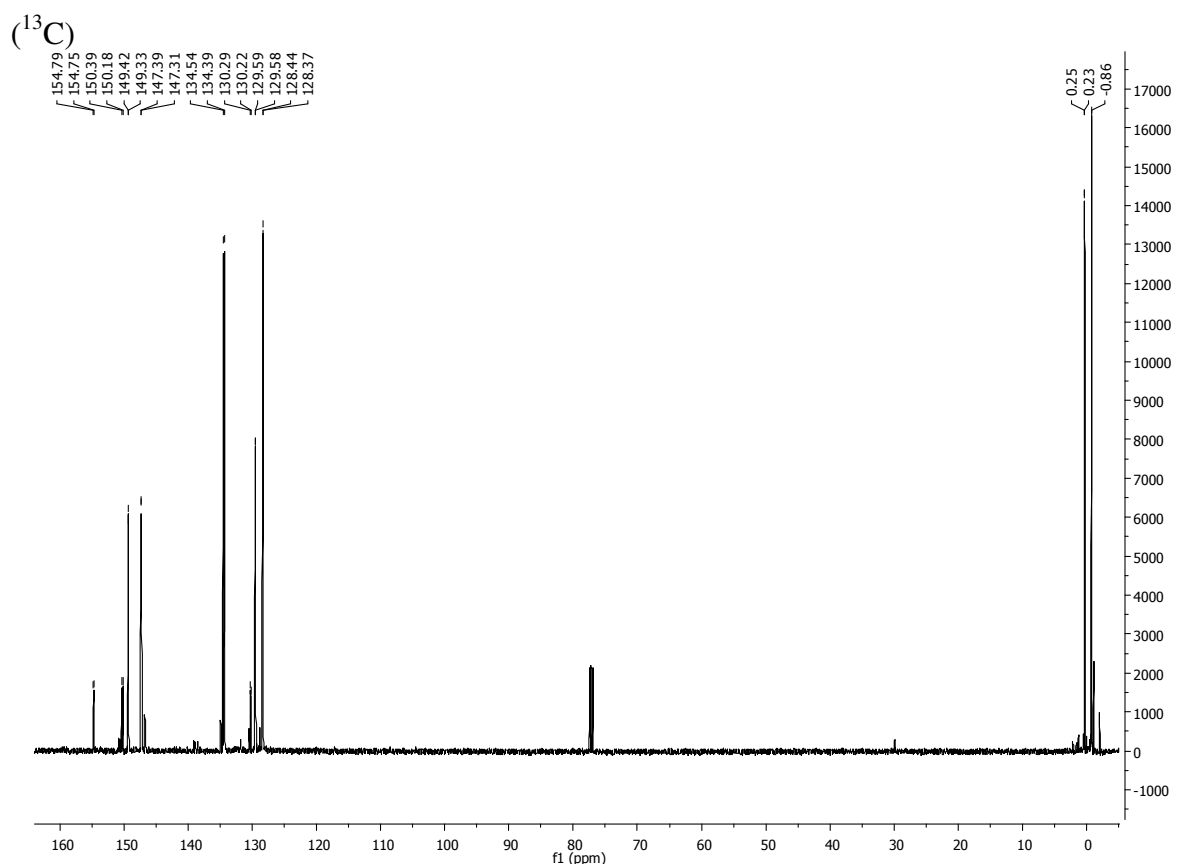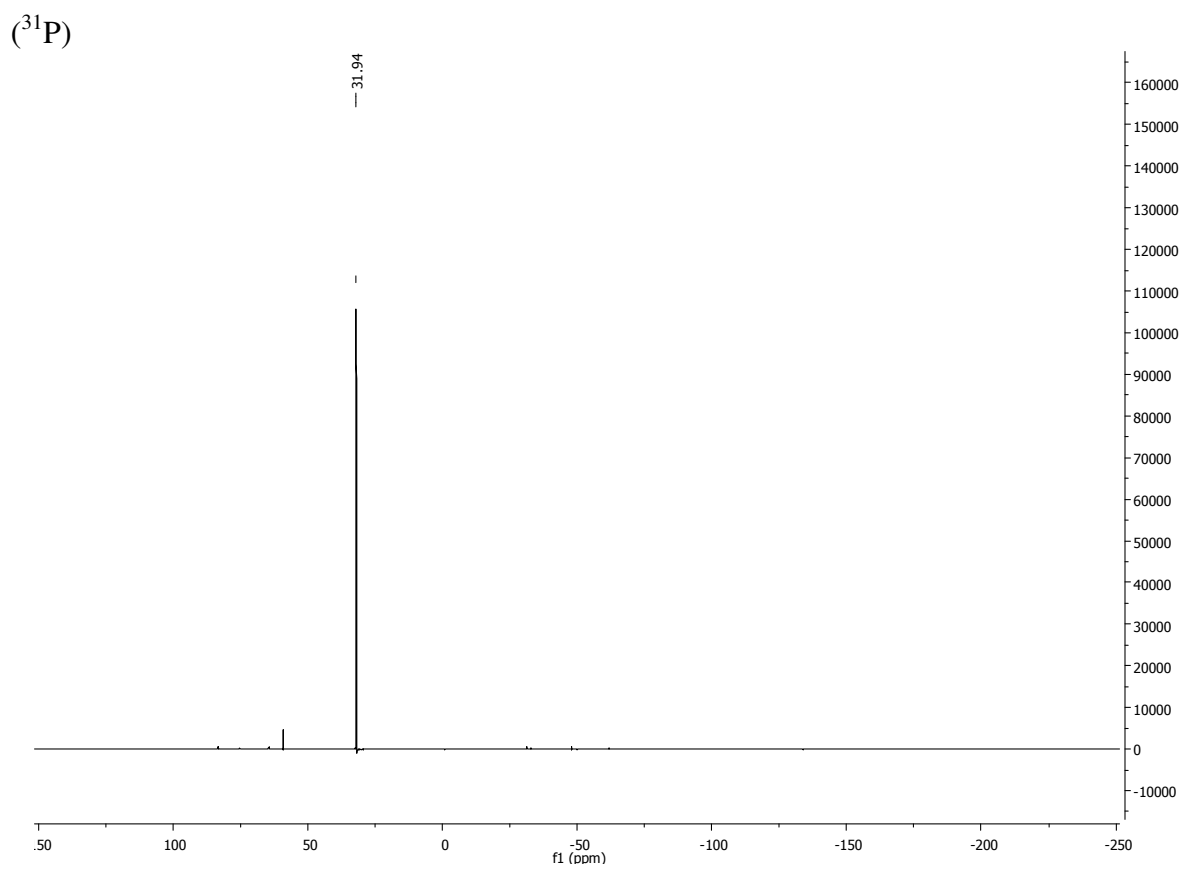

(3k)  
(<sup>1</sup>H)

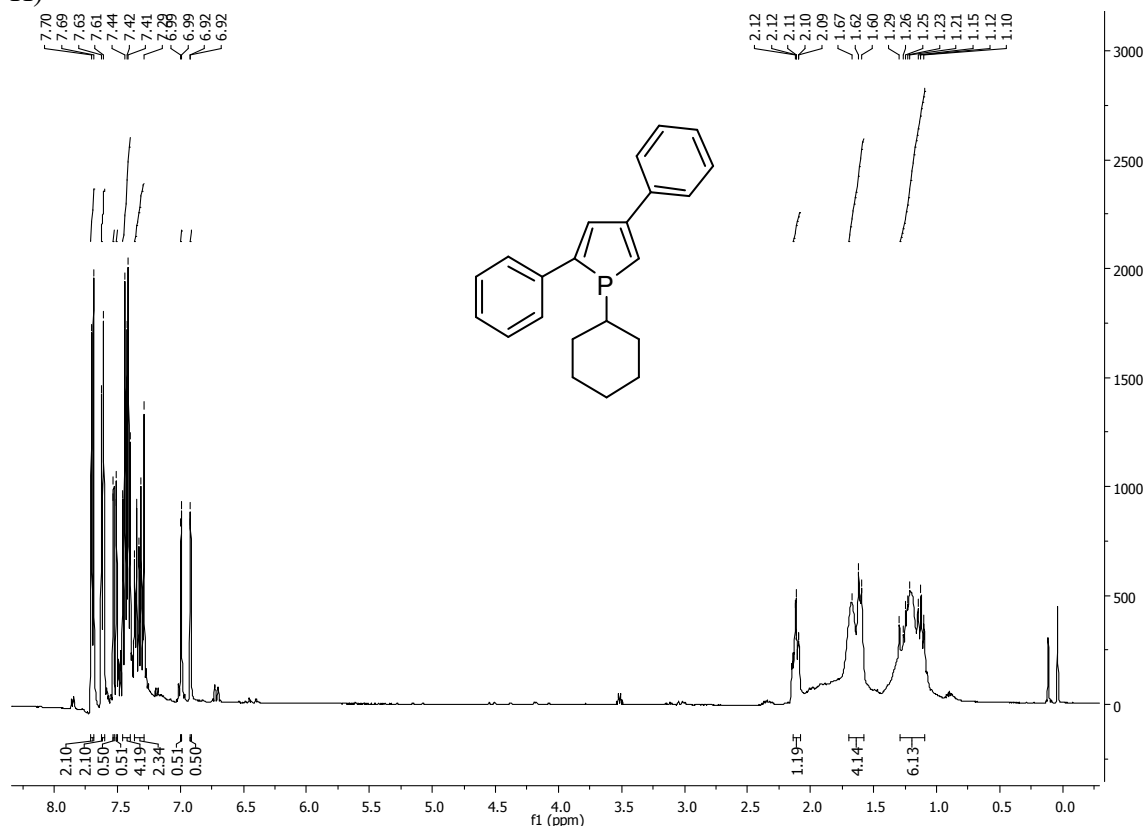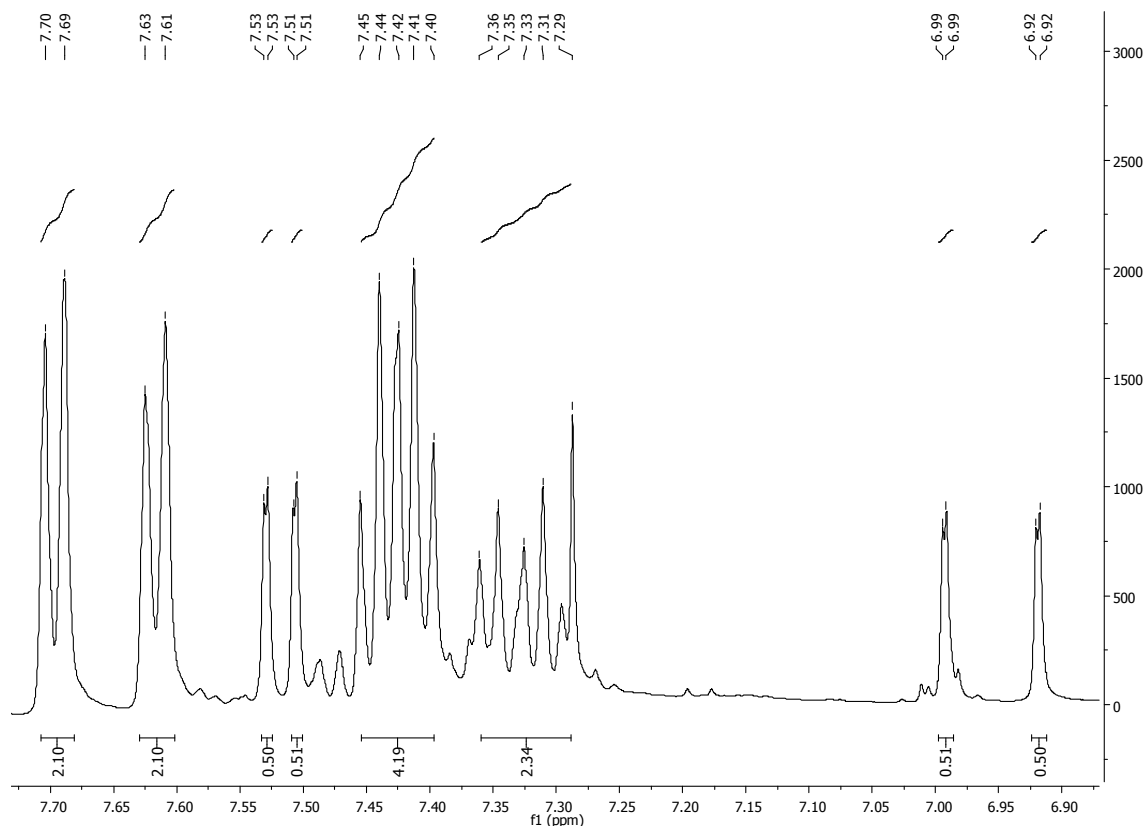

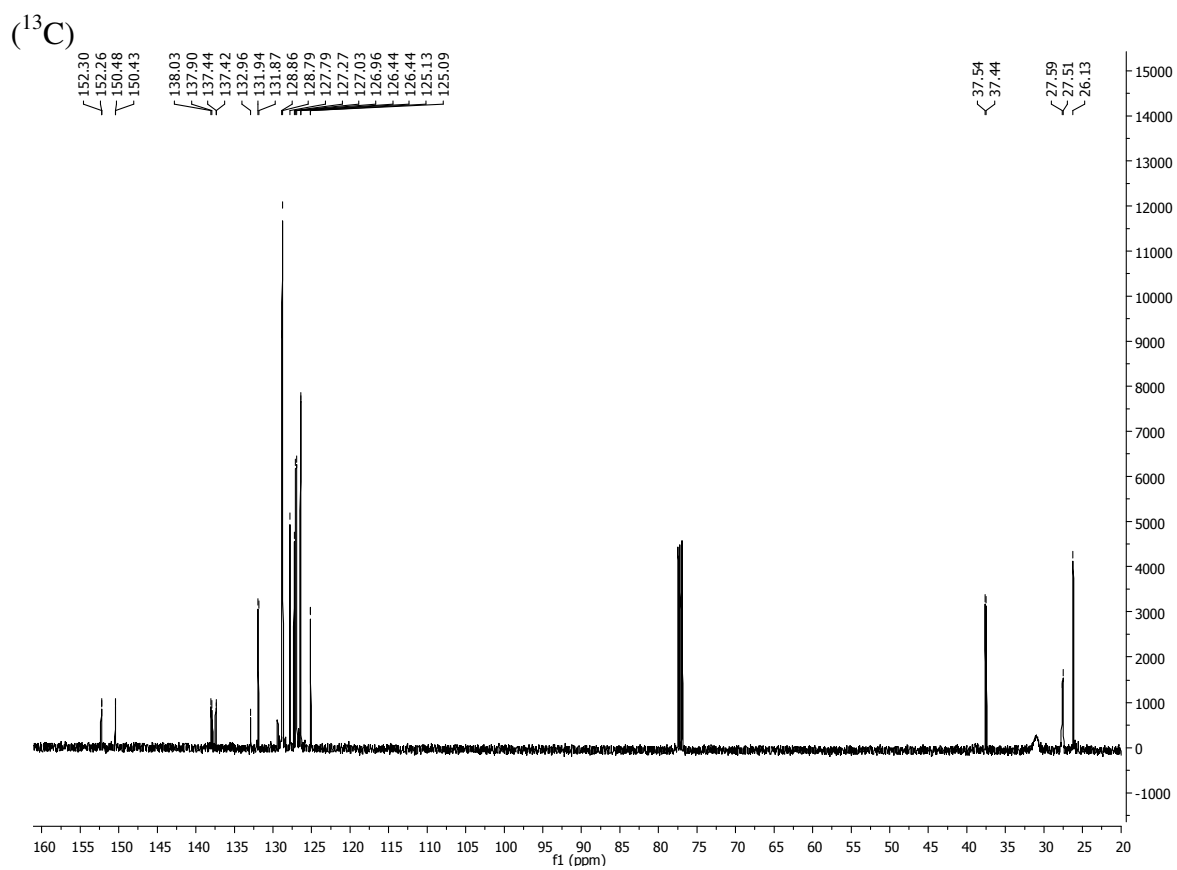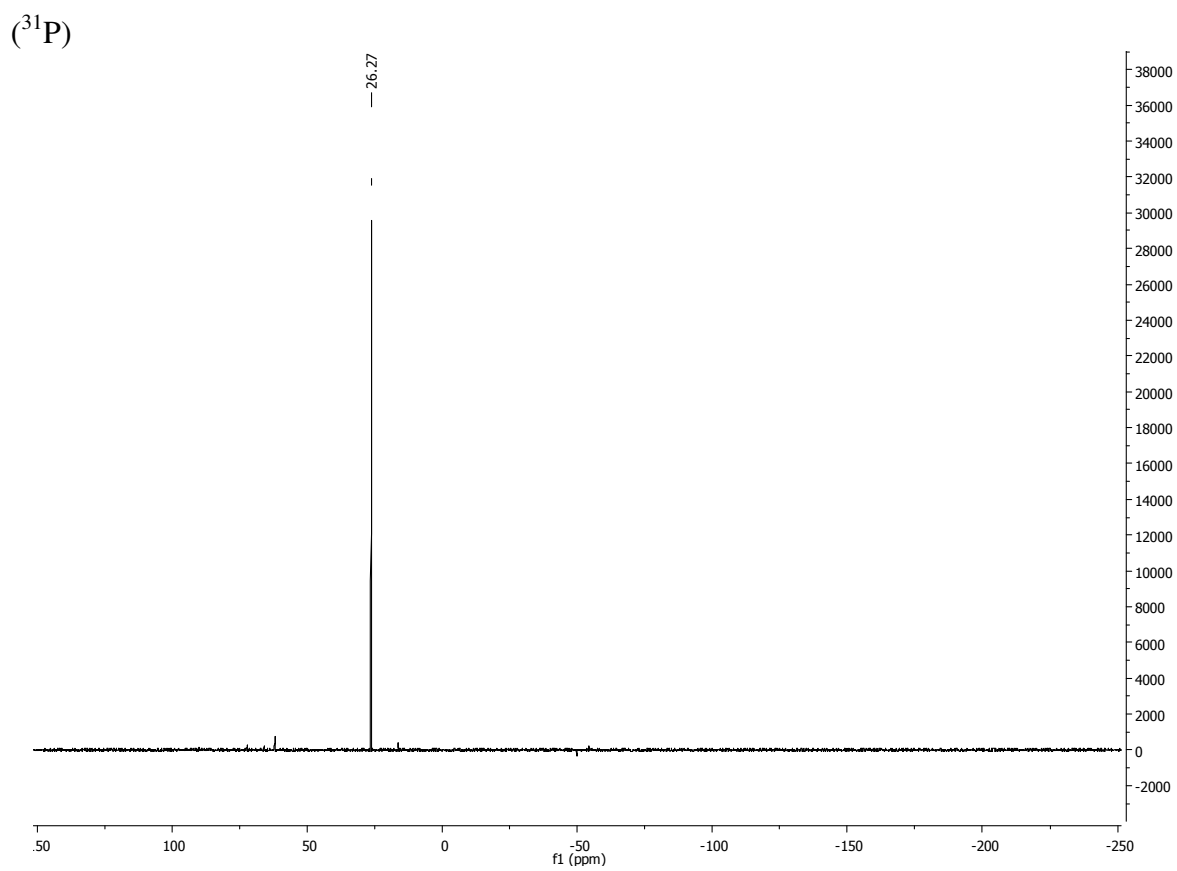



31  
(<sup>1</sup>H)

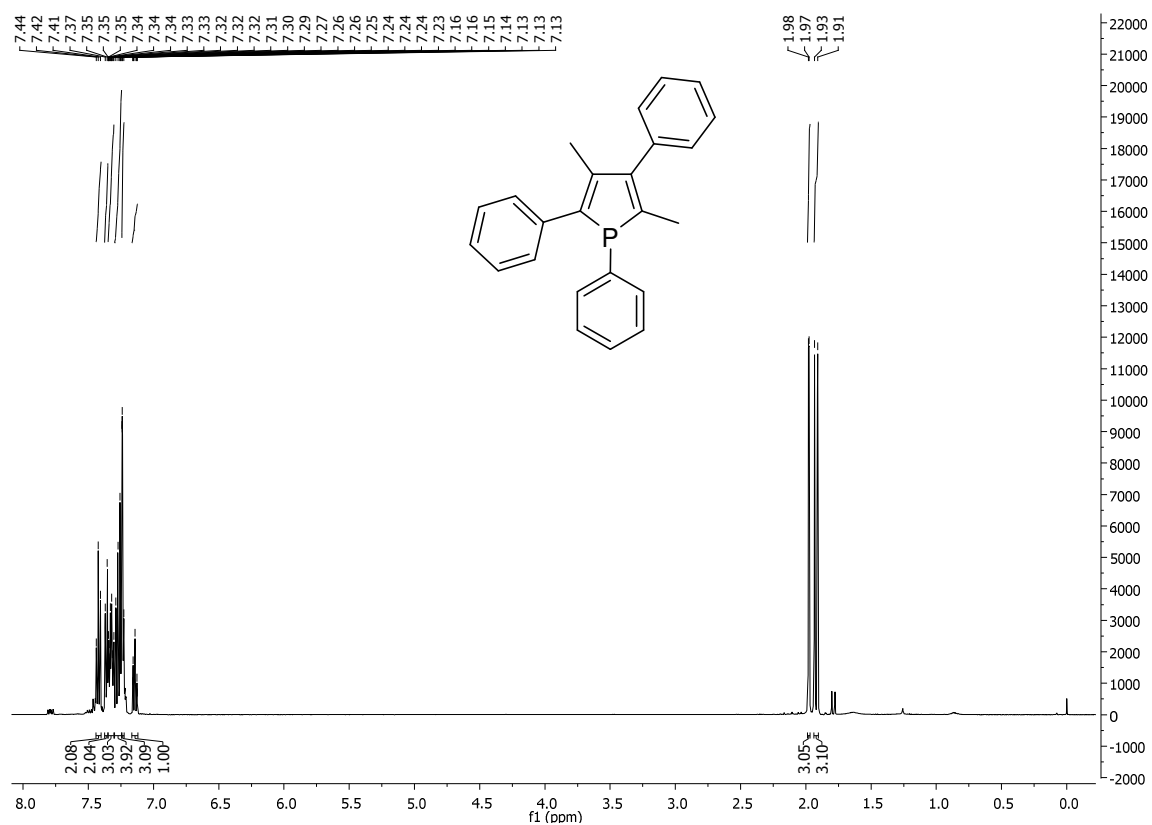

(<sup>13</sup>C)

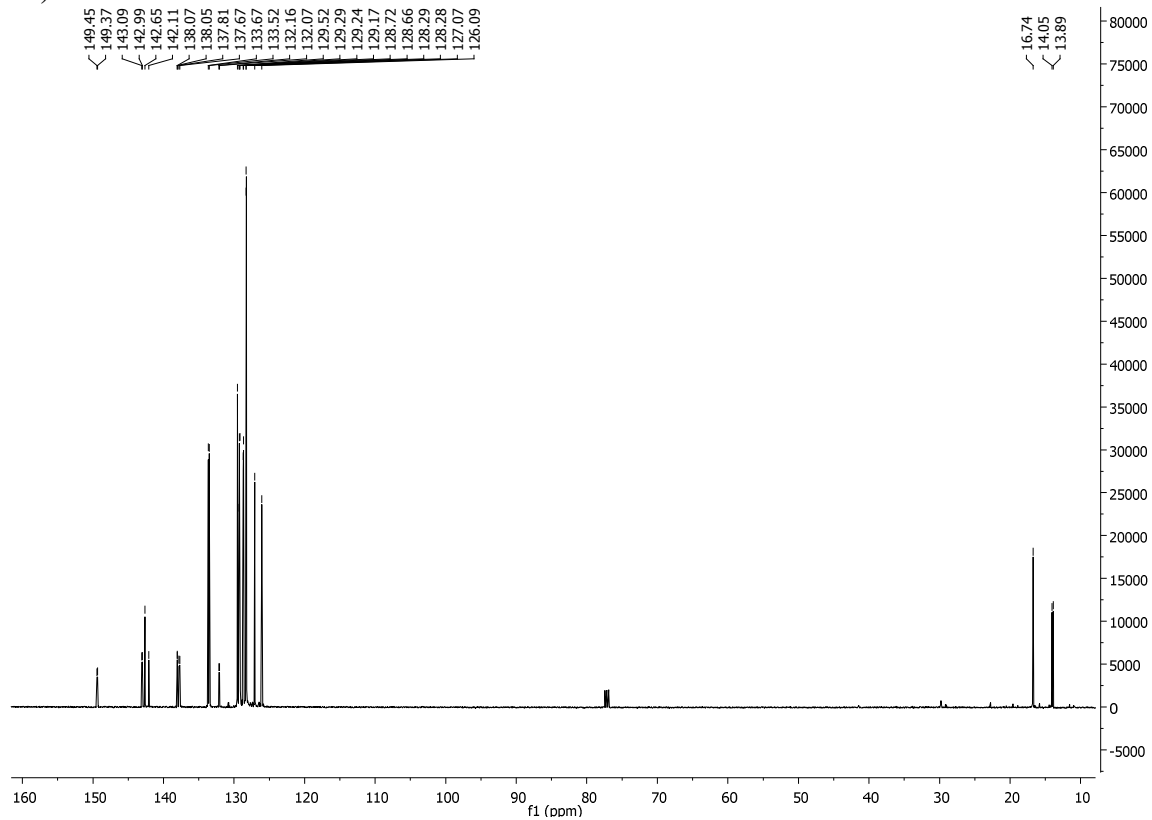

$^{31}\text{P}$

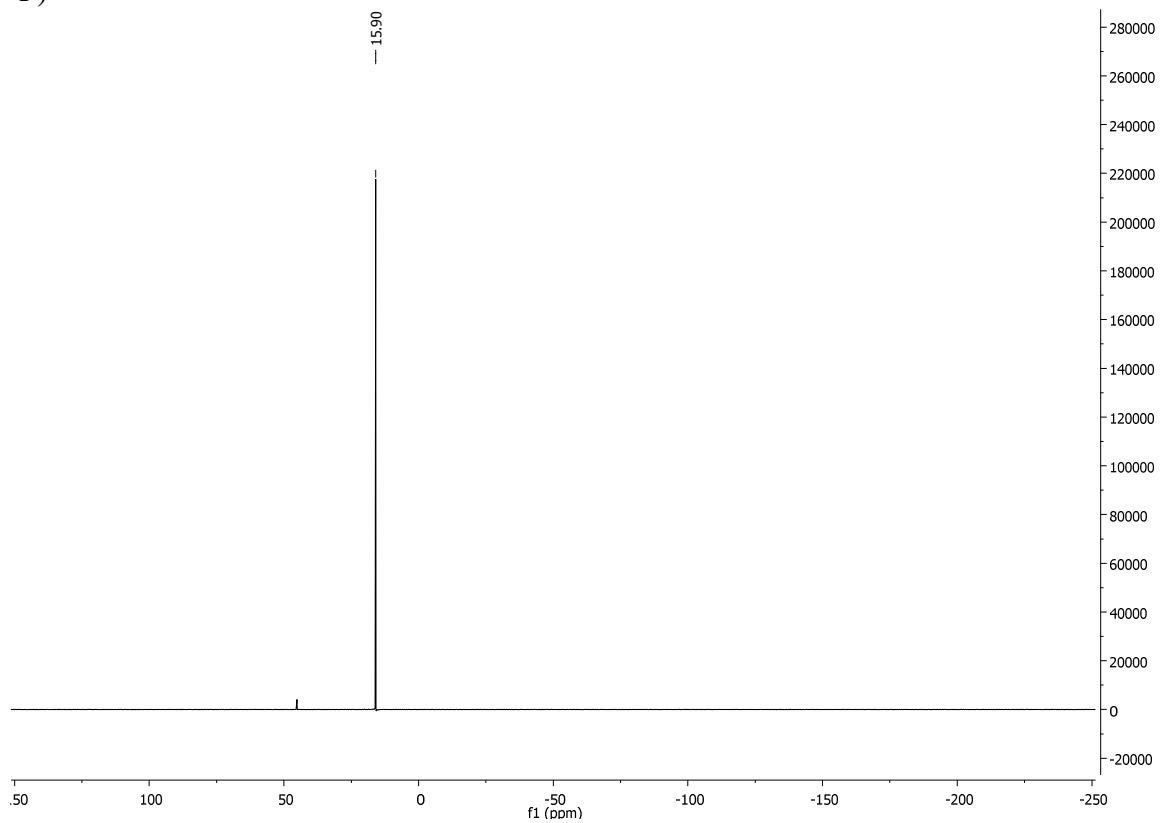

Supplement: c3dt51158h.pdf [file c3dt51158h.pdf]
